# Supplementary material for: Intramolecular rhodium-catalysed [2 + 2 + 2] cycloaddition of linear chiral N-bridged triynes: straightforward access to fused tetrahydroisoquinoline core
Source: Royal Society of Chemistry journal article supplement (doi:10.1039/d2ob00340f), 2022-01-01

*Supporting Information for*

Intramolecular rhodium-catalysed [2+2+2]  
cycloaddition of linear chiral *N*-bridged triynes:  
Straightforward access to fused  
tetrahydroisoquinoline core

Alberto Llobat, Jorge Escorihuela, Carmen Ramírez de Arellano, Santos Fustero  
and Mercedes Medio-Simón\*

Departamento de Química Orgánica, Universitat de València, 46100 Burjassot,  
València, Spain.

## Table of Contents.

|                                                                                        | Page |
|----------------------------------------------------------------------------------------|------|
| I. X-ray structure of compound ( <i>R,R</i> )- <b>9e</b> ..                            | S3   |
| II. Cartesian coordinates of optimized structures.                                     | S4   |
| III. <sup>1</sup> H, <sup>13</sup> C and <sup>19</sup> F NMR spectra of new compounds. | S15  |

## I. X-ray structure of compound (*R,R*)-9e.

### Single crystal X-ray diffraction discussion

Crystals of (*R,R*)-9e suitable for single crystal X-ray diffraction were grown from  $\text{Cl}_2\text{CH}_2$  / *n*-hexane solution and its absolute structure unambiguously determined (Figure 1).

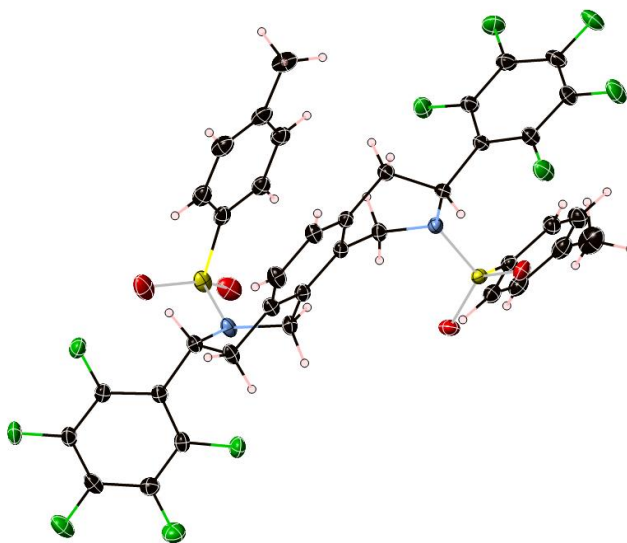

Figure 1. X-ray thermal ellipsoid plot for (*R,R*)-9e (40% probability level).

### Single crystal X-ray diffraction experimental data for compound $[(R,R)\text{-}9\text{e}]_4 \cdot \text{CH}_2\text{Cl}_2$

$[\text{C}_{38}\text{H}_{26}\text{F}_{10}\text{N}_2\text{O}_4\text{S}_2]_4 \cdot [\text{CH}_2\text{Cl}_2]$ , (CCDC 2100190)  $M = 3399.83$ , orthorhombic,  $a = 7.7647(5)$ ,  $b = 12.5408(11)$ ,  $c = 38.014(3)$  Å,  $V = 3701.6(5)$  Å<sup>3</sup>, space group  $P_{2(1)2(1)2(1)}$ ,  $Z = 1$ ,  $T = 120(2)$  K,  $\lambda = 0.71073$  Å,  $D_{\text{calc}} = 1.525$  g·cm<sup>-3</sup>,  $\mu = 0.275$  cm<sup>-1</sup>, 127114 reflections measured, 10449 unique ( $R_{\text{int}} = 0.0451$ ), colorless crystals obtained by  $\text{CH}_2\text{Cl}_2$ /*n*-hexane diffusion, crystal structure solved by dual methods and all non hydrogen atoms refined anisotropically on  $F^2$  using the programs SHELXT-2018 and SHELXL-2018<sup>[5]</sup>, methyl group hydrogen atoms were included as *riding* and others using a *riding* model, the dichloromethane molecule is disordered over two sites and was refined with restrained bond lengths and angles, absolute structure was determined with Flack  $x = 0.033(19)$ , GOF = 1.144,  $R$  ( $F_o, I > 2\sigma(I)$ ) = 0.0523,  $R_w$  ( $F_o^2$ , all data) = 0.1371.

## II. Cartesian coordinates of optimized structures.

6

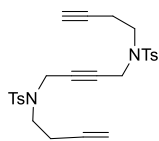

Zero-point correction= 0.484475 (Hartree/Particle)  
 Thermal correction to Energy= 0.521304  
 Thermal correction to Enthalpy= 0.522248  
 Thermal correction to Gibbs Free Energy= 0.411342  
 Sum of electronic and zero-point Energies= -2213.377168  
 Sum of electronic and thermal Energies= -2213.340339  
 Sum of electronic and thermal Enthalpies= -2213.339395  
 Sum of electronic and thermal Free Energies= -2213.450301

|    |              |              |              |   |              |              |              |
|----|--------------|--------------|--------------|---|--------------|--------------|--------------|
| 6  | -0.786795000 | -1.782218000 | 1.020685000  | 6 | -2.761272000 | -4.505542000 | 2.371121000  |
| 1  | 0.144773000  | -1.709331000 | 1.585307000  | 6 | -2.134480000 | -5.386897000 | 1.501147000  |
| 6  | 0.968402000  | 3.458180000  | 0.754806000  | 6 | -2.994384000 | -4.786121000 | 3.709733000  |
| 1  | 1.910192000  | 3.088831000  | 1.163658000  | 6 | -1.709204000 | -6.613137000 | 2.014961000  |
| 1  | 0.916486000  | 4.534416000  | 0.935835000  | 1 | -2.021062000 | -5.134972000 | 0.456953000  |
| 6  | -1.693082000 | -1.262590000 | 3.377019000  | 6 | -2.559790000 | -6.018965000 | 4.200464000  |
| 1  | -2.671830000 | -1.208776000 | 3.854967000  | 1 | -3.528529000 | -4.082431000 | 4.331571000  |
| 6  | 0.126102000  | 2.388127000  | 2.899549000  | 6 | -1.906523000 | -6.942787000 | 3.367071000  |
| 1  | -0.257282000 | 3.176767000  | 3.554702000  | 1 | -1.228148000 | -7.323848000 | 1.356222000  |
| 1  | 1.206535000  | 2.333037000  | 3.043992000  | 1 | -2.739764000 | -6.268376000 | 5.237621000  |
| 7  | -0.106691000 | 2.703457000  | 1.455260000  | 6 | -1.414367000 | -8.261386000 | 3.914021000  |
| 7  | -1.906396000 | -1.688663000 | 1.975566000  | 1 | -1.987759000 | -8.571753000 | 4.787620000  |
| 6  | -0.496214000 | 1.106391000  | 3.217498000  | 1 | -1.481983000 | -9.053280000 | 3.167306000  |
| 1  | -1.082781000 | -1.990913000 | 3.928065000  | 1 | -0.366354000 | -8.187587000 | 4.218116000  |
| 6  | -1.049794000 | 0.046212000  | 3.360227000  | 6 | -5.358212000 | -0.657583000 | -1.225432000 |
| 16 | -3.280943000 | -2.823837000 | 1.711291000  | 1 | -5.503580000 | -0.495178000 | -2.293513000 |
| 16 | -1.791370000 | 3.645870000  | 1.310857000  | 1 | -4.885287000 | -1.631283000 | -1.081324000 |
| 8  | -2.318815000 | 3.953630000  | 2.834214000  | 1 | -6.340029000 | -0.700290000 | -0.750119000 |
| 8  | -1.559426000 | 4.859323000  | 0.231965000  | 1 | -0.789034000 | -2.748789000 | 0.515430000  |
| 8  | -3.400121000 | -2.967578000 | 0.084049000  | 6 | -0.875723000 | -0.650060000 | -0.024292000 |
| 8  | -4.492180000 | -2.273854000 | 2.670878000  | 1 | -1.814467000 | -0.766505000 | -0.567545000 |
| 6  | -2.897806000 | 2.356745000  | 0.540219000  | 1 | -0.927049000 | 0.306537000  | 0.498432000  |
| 6  | -3.585928000 | 1.492229000  | 1.378656000  | 6 | 0.929956000  | 3.172809000  | -0.759351000 |
| 6  | -2.971859000 | 2.306923000  | -0.842737000 | 1 | 0.842971000  | 2.093733000  | -0.905632000 |
| 6  | -4.393621000 | 0.520563000  | 0.789062000  | 1 | 0.037074000  | 3.637721000  | -1.179303000 |
| 1  | -3.495978000 | 1.579483000  | 2.450606000  | 6 | 0.261975000  | -0.649296000 | -0.940049000 |
| 6  | -3.787053000 | 1.325759000  | -1.411123000 | 6 | 1.216516000  | -0.645489000 | -1.678775000 |
| 1  | -2.435612000 | 3.021143000  | -1.449684000 | 6 | 2.121545000  | 3.680217000  | -1.437379000 |
| 6  | -4.504140000 | 0.421442000  | -0.609951000 | 6 | 3.114707000  | 4.102378000  | -1.976319000 |
| 1  | -4.925074000 | -0.177042000 | 1.421025000  | 1 | 2.050062000  | -0.630488000 | -2.334944000 |
| 1  | -3.867392000 | 1.265665000  | -2.488166000 | 1 | 3.981989000  | 4.478083000  | -2.457929000 |

RhCl(Ph<sub>3</sub>)<sub>3</sub>

Zero-point correction= 0.834166 (Hartree/Particle)  
 Thermal correction to Energy= 0.887153  
 Thermal correction to Enthalpy= 0.888097  
 Thermal correction to Gibbs Free Energy= 0.743447  
 Sum of electronic and zero-point Energies= -3679.087566  
 Sum of electronic and thermal Energies= -3679.034579  
 Sum of electronic and thermal Enthalpies= -3679.033635  
 Sum of electronic and thermal Free Energies= -3679.178286

|    |              |              |              |   |              |              |              |
|----|--------------|--------------|--------------|---|--------------|--------------|--------------|
| 45 | 0.033896000  | 0.489790000  | -0.466310000 | 6 | 0.412712000  | -4.555651000 | 3.062640000  |
| 15 | -2.287062000 | 0.956293000  | -0.105264000 | 1 | 0.933962000  | -4.516468000 | 0.978093000  |
| 15 | 0.017996000  | -1.814803000 | -0.094107000 | 6 | -0.694622000 | -2.581451000 | 3.913588000  |
| 15 | 2.330084000  | 0.916582000  | -0.025749000 | 1 | -1.011860000 | -1.003427000 | 2.487669000  |
| 17 | 0.093148000  | 2.505605000  | -1.876864000 | 6 | -0.173431000 | -3.861441000 | 4.125079000  |
| 6  | -2.427158000 | 2.720557000  | 0.564343000  | 1 | 0.814974000  | -5.548133000 | 3.217830000  |
| 6  | -3.638410000 | 3.420044000  | 0.522552000  | 1 | -1.164830000 | -2.040105000 | 4.723103000  |
| 6  | -1.303401000 | 3.313223000  | 1.151238000  | 1 | -0.226358000 | -4.315137000 | 5.105981000  |
| 6  | -3.723100000 | 4.704850000  | 1.066013000  | 6 | 1.474353000  | -2.644217000 | -0.987440000 |
| 1  | -4.508072000 | 2.977814000  | 0.057163000  | 6 | 2.679175000  | -2.908665000 | -0.323702000 |
| 6  | -1.390806000 | 4.595762000  | 1.698150000  | 6 | 1.385654000  | -2.893232000 | -2.364817000 |
| 1  | -0.357744000 | 2.791375000  | 1.150036000  | 6 | 3.781660000  | -3.397853000 | -1.029370000 |
| 6  | -2.600800000 | 5.293382000  | 1.657098000  | 1 | 2.767366000  | -2.733178000 | 0.736128000  |
| 1  | -4.660241000 | 5.244378000  | 1.021755000  | 6 | 2.487962000  | -3.385331000 | -3.066893000 |
| 1  | -0.508127000 | 5.044722000  | 2.132653000  | 1 | 0.462598000  | -2.704748000 | -2.892879000 |
| 1  | -2.667578000 | 6.290809000  | 2.071837000  | 6 | 3.692076000  | -3.633918000 | -2.402337000 |
| 6  | -3.543326000 | 0.928975000  | -1.520188000 | 1 | 4.707063000  | -3.583840000 | -0.501176000 |
| 6  | -4.899105000 | 0.636761000  | -1.326244000 | 1 | 2.404433000  | -3.570322000 | -4.129749000 |
| 6  | -3.075631000 | 1.210644000  | -2.811674000 | 1 | 4.548952000  | -4.004718000 | -2.948543000 |
| 6  | -5.775593000 | 0.603067000  | -2.415571000 | 6 | 3.192932000  | -0.141608000 | 1.278492000  |
| 1  | -5.274137000 | 0.424113000  | -0.335681000 | 6 | 4.526566000  | -0.554798000 | 1.182870000  |
| 6  | -3.954994000 | 1.180760000  | -3.896405000 | 6 | 2.417535000  | -0.569798000 | 2.363296000  |
| 1  | -2.034606000 | 1.459753000  | -2.960956000 | 6 | 5.067551000  | -1.403405000 | 2.153379000  |
| 6  | -5.305177000 | 0.870737000  | -3.703259000 | 1 | 5.131799000  | -0.249672000 | 0.342454000  |
| 1  | -6.820180000 | 0.370096000  | -2.254887000 | 6 | 2.955032000  | -1.420937000 | 3.330777000  |
| 1  | -3.584150000 | 1.402758000  | -4.888357000 | 1 | 1.381845000  | -0.270783000 | 2.423717000  |
| 1  | -5.983546000 | 0.844003000  | -4.545983000 | 6 | 4.283321000  | -1.843362000 | 3.224704000  |
| 6  | -3.168138000 | -0.004487000 | 1.265874000  | 1 | 6.096371000  | -1.727543000 | 2.065777000  |
| 6  | -3.190381000 | 0.495717000  | 2.576116000  | 1 | 2.329683000  | -1.768388000 | 4.141736000  |
| 6  | -3.709354000 | -1.272506000 | 1.010453000  | 1 | 4.701257000  | -2.512780000 | 3.964758000  |
| 6  | -3.732360000 | -0.267701000 | 3.614266000  | 6 | 3.548042000  | 0.957091000  | -1.451847000 |
| 1  | -2.787262000 | 1.476019000  | 2.785811000  | 6 | 4.753592000  | 1.669296000  | -1.395192000 |
| 6  | -4.247561000 | -2.033886000 | 2.049771000  | 6 | 3.223701000  | 0.229587000  | -2.601100000 |
| 1  | -3.714391000 | -1.667285000 | 0.007227000  | 6 | 5.633994000  | 1.640264000  | -2.479600000 |
| 6  | -4.257602000 | -1.536639000 | 3.355373000  | 1 | 4.995652000  | 2.253607000  | -0.517864000 |
| 1  | -3.745597000 | 0.132097000  | 4.619900000  | 6 | 4.108521000  | 0.195864000  | -3.681290000 |
| 1  | -4.651525000 | -3.014141000 | 1.835110000  | 1 | 2.281715000  | -0.296116000 | -2.648305000 |
| 1  | -4.670379000 | -2.129776000 | 4.160470000  | 6 | 5.314102000  | 0.899526000  | -3.622242000 |
| 6  | -1.443958000 | -2.626679000 | -0.992544000 | 1 | 6.561562000  | 2.195712000  | -2.433786000 |
| 6  | -2.040145000 | -3.815332000 | -0.555466000 | 1 | 3.851060000  | -0.372036000 | -4.565125000 |
| 6  | -1.957869000 | -1.973426000 | -2.119952000 | 1 | 5.996191000  | 0.879404000  | -4.462067000 |
| 6  | -3.156418000 | -4.325895000 | -1.224412000 | 6 | 2.486478000  | 2.646279000  | 0.739081000  |
| 1  | -1.665100000 | -4.323781000 | 0.320062000  | 6 | 2.541426000  | 3.772033000  | -0.094558000 |
| 6  | -3.077592000 | -2.479367000 | -2.784269000 | 6 | 2.446847000  | 2.822233000  | 2.128328000  |
| 1  | -1.507687000 | -1.047895000 | -2.449313000 | 6 | 2.559106000  | 5.054120000  | 0.458216000  |
| 6  | -3.682552000 | -3.655750000 | -2.333814000 | 1 | 2.542324000  | 3.649511000  | -1.165493000 |
| 1  | -3.619595000 | -5.238232000 | -0.871845000 | 6 | 2.459454000  | 4.107896000  | 2.678119000  |
| 1  | -3.483940000 | -1.938929000 | -3.628034000 | 1 | 2.413546000  | 1.968289000  | 2.788157000  |
| 1  | -4.558160000 | -4.043287000 | -2.837295000 | 6 | 2.515312000  | 5.227443000  | 1.844413000  |
| 6  | -0.026264000 | -2.683184000 | 1.584030000  | 1 | 2.593003000  | 5.913940000  | -0.197119000 |
| 6  | 0.480805000  | -3.971968000 | 1.794090000  | 1 | 2.429135000  | 4.228943000  | 3.753122000  |
| 6  | -0.617301000 | -1.995101000 | 2.649102000  | 1 | 2.523802000  | 6.222745000  | 2.269116000  |

A

Zero-point correction= 0.764965 (Hartree/Particle)  
Thermal correction to Energy= 0.821339  
Thermal correction to Enthalpy= 0.822283  
Thermal correction to Gibbs Free Energy= 0.668626  
Sum of electronic and zero-point Energies= -3820.350512  
Sum of electronic and thermal Energies= -3820.294138  
Sum of electronic and thermal Enthalpies= -3820.293194

Sum of electronic and thermal Free Energies= -3820.446851

---

|    |               |              |              |    |              |              |              |
|----|---------------|--------------|--------------|----|--------------|--------------|--------------|
| 6  | -1.653666000  | -0.880579000 | 1.003358000  | 1  | -1.523437000 | -1.923942000 | 0.715252000  |
| 1  | -0.9144465000 | -0.685282000 | 1.776470000  | 6  | -1.420490000 | 0.043615000  | -0.208239000 |
| 6  | 0.271980000   | 3.778249000  | 0.580551000  | 1  | -2.235235000 | -0.114067000 | -0.918896000 |
| 1  | 0.974838000   | 3.262979000  | 1.232901000  | 1  | -1.476798000 | 1.077685000  | 0.132650000  |
| 1  | 0.465457000   | 4.852484000  | 0.644209000  | 6  | 0.444196000  | 3.279286000  | -0.875837000 |
| 6  | -3.118425000  | -0.196115000 | 2.988870000  | 1  | -0.492061000 | 2.817286000  | -1.193353000 |
| 1  | -4.181472000  | -0.129797000 | 3.221870000  | 1  | 0.604306000  | 4.128316000  | -1.542769000 |
| 6  | -1.215565000  | 3.400972000  | 2.609405000  | 6  | -0.143869000 | -0.231938000 | -0.879024000 |
| 1  | -1.781736000  | 4.271459000  | 2.953958000  | 6  | 0.760124000  | -0.677325000 | -1.590024000 |
| 1  | -0.225061000  | 3.451516000  | 3.061375000  | 6  | 1.522034000  | 2.290384000  | -1.054287000 |
| 7  | -1.058088000  | 3.417619000  | 1.123311000  | 6  | 2.494392000  | 1.716665000  | -1.592695000 |
| 7  | -2.996131000  | -0.628705000 | 1.572285000  | 1  | 1.302934000  | -1.175534000 | -2.358437000 |
| 6  | -1.893638000  | 2.158654000  | 2.967424000  | 1  | 3.318420000  | 1.604168000  | -2.264375000 |
| 1  | -2.656619000  | -0.919579000 | 3.673076000  | 45 | 1.868395000  | 0.432004000  | -0.009270000 |
| 6  | -2.477160000  | 1.110420000  | 3.080973000  | 17 | 1.682309000  | -1.469157000 | 1.496543000  |
| 16 | -4.269840000  | -1.817419000 | 1.046851000  | 15 | 3.513206000  | 1.376152000  | 1.461931000  |
| 16 | -2.428731000  | 4.498910000  | 0.332994000  | 6  | 2.744551000  | 2.155503000  | 3.002167000  |
| 8  | -3.313393000  | 5.142256000  | 1.556369000  | 6  | 3.150993000  | 3.397406000  | 3.507252000  |
| 8  | -1.702278000  | 5.455265000  | -0.787982000 | 6  | 1.746348000  | 1.427113000  | 3.667247000  |
| 8  | -3.998790000  | -2.047353000 | -0.552290000 | 6  | 2.551296000  | 3.914608000  | 4.660893000  |
| 8  | -5.681850000  | -1.233096000 | 1.645156000  | 6  | 1.161671000  | 1.942295000  | 4.826216000  |
| 6  | -3.439063000  | 3.195770000  | -0.542329000 | 6  | 1.557673000  | 3.188560000  | 5.322879000  |
| 6  | -4.302136000  | 2.417069000  | 0.214661000  | 1  | 3.926785000  | 3.961414000  | 3.010632000  |
| 6  | -3.247407000  | 3.028977000  | -1.904491000 | 1  | 1.430354000  | 0.469399000  | 3.279976000  |
| 6  | -5.009378000  | 1.409085000  | -0.438132000 | 1  | 2.866273000  | 4.877220000  | 5.040955000  |
| 1  | -4.413454000  | 2.584053000  | 1.275034000  | 1  | 0.386995000  | 1.377751000  | 5.326153000  |
| 6  | -3.966398000  | 2.011541000  | -2.537311000 | 1  | 1.095673000  | 3.589766000  | 6.214833000  |
| 1  | -2.578201000  | 3.680209000  | -2.447674000 | 6  | 4.771526000  | 0.179903000  | 2.176442000  |
| 6  | -4.849103000  | 1.188524000  | -1.818547000 | 6  | 5.438017000  | 0.470836000  | 3.372565000  |
| 1  | -5.671802000  | 0.774912000  | 0.134562000  | 6  | 5.073807000  | -0.990716000 | 1.473315000  |
| 1  | -3.839567000  | 1.858590000  | -3.600712000 | 6  | 6.408346000  | -0.406990000 | 3.861263000  |
| 6  | -3.907310000  | -3.446037000 | 1.908738000  | 6  | 6.049991000  | -1.863221000 | 1.961738000  |
| 6  | -3.055812000  | -4.345808000 | 1.281895000  | 6  | 6.717973000  | -1.572935000 | 3.154221000  |
| 6  | -4.465000000  | -3.663786000 | 3.160514000  | 1  | 5.195887000  | 1.368238000  | 3.925242000  |
| 6  | -2.739735000  | -5.521869000 | 1.963346000  | 1  | 4.527899000  | -1.233482000 | 0.573541000  |
| 1  | -2.681773000  | -4.144633000 | 0.289092000  | 1  | 6.916420000  | -0.182531000 | 4.789646000  |
| 6  | -4.135666000  | -4.848868000 | 3.821212000  | 1  | 6.273564000  | -2.772282000 | 1.420150000  |
| 1  | -5.155762000  | -2.948747000 | 3.583361000  | 1  | 7.467454000  | -2.253866000 | 3.535118000  |
| 6  | -3.264499000  | -5.785798000 | 3.240130000  | 6  | 4.611267000  | 2.733644000  | 0.749385000  |
| 1  | -2.080735000  | -6.241472000 | 1.496413000  | 6  | 5.976546000  | 2.511437000  | 0.530043000  |
| 1  | -4.565046000  | -5.049207000 | 4.793776000  | 6  | 4.045280000  | 3.955852000  | 0.356345000  |
| 6  | -2.883042000  | -7.046901000 | 3.977642000  | 6  | 6.764348000  | 3.500745000  | -0.067612000 |
| 1  | -3.629826000  | -7.316267000 | 4.724699000  | 6  | 4.834654000  | 4.945036000  | -0.231752000 |
| 1  | -2.769268000  | -7.889459000 | 3.294433000  | 6  | 6.197591000  | 4.718937000  | -0.447370000 |
| 1  | -1.929248000  | -6.916638000 | 4.496630000  | 1  | 6.427765000  | 1.575686000  | 0.825658000  |
| 6  | -5.594334000  | 0.065507000  | -2.493231000 | 1  | 2.992976000  | 4.140271000  | 0.505979000  |
| 1  | -5.504040000  | 0.116728000  | -3.578454000 | 1  | 7.817927000  | 3.316880000  | -0.230132000 |
| 1  | -5.199317000  | -0.893838000 | -2.152748000 | 1  | 4.384872000  | 5.883998000  | -0.525194000 |
| 1  | -6.655500000  | 0.088649000  | -2.237525000 | 1  | 6.808582000  | 5.483598000  | -0.907709000 |

---

**B**

Zero-point correction= 0.764561 (Hartree/Particle)  
Thermal correction to Energy= 0.821367  
Thermal correction to Enthalpy= 0.822311  
Thermal correction to Gibbs Free Energy= 0.664522  
Sum of electronic and zero-point Energies= -3820.351448  
Sum of electronic and thermal Energies= -3820.294641  
Sum of electronic and thermal Enthalpies= -3820.293697  
Sum of electronic and thermal Free Energies= -3820.451486

---

|    |              |              |              |    |              |              |              |
|----|--------------|--------------|--------------|----|--------------|--------------|--------------|
| 6  | 1.779610000  | -0.051356000 | 2.207382000  | 6  | 0.490028000  | 0.083067000  | 8.756214000  |
| 1  | 2.521614000  | -0.849093000 | 2.130702000  | 1  | 1.197201000  | -0.710726000 | 8.999208000  |
| 1  | 1.167847000  | -0.278216000 | 3.085499000  | 1  | 0.577506000  | 0.848472000  | 9.532725000  |
| 6  | 0.906088000  | -0.103017000 | 1.009294000  | 1  | -0.516344000 | -0.331813000 | 8.816050000  |
| 6  | 0.071507000  | -0.658652000 | 0.273229000  | 6  | -4.528417000 | 4.449011000  | 3.742609000  |
| 6  | -1.078771000 | -1.495858000 | -0.115533000 | 1  | -5.570127000 | 4.722126000  | 3.572642000  |
| 1  | -1.061114000 | -2.404985000 | 0.489402000  | 1  | -4.345949000 | 4.500013000  | 4.819883000  |
| 1  | -1.032381000 | -1.796177000 | -1.163208000 | 1  | 5.823693000  | 2.008859000  | 1.892719000  |
| 7  | -2.343025000 | -0.780058000 | 0.116591000  | 6  | -0.659698000 | 2.327402000  | -0.179747000 |
| 7  | 2.565118000  | 1.156838000  | 2.489705000  | 6  | 5.573891000  | -0.274943000 | 4.148165000  |
| 6  | 3.747511000  | 1.519869000  | 1.681255000  | 1  | -1.642617000 | 0.166265000  | -2.527341000 |
| 1  | 3.919000000  | 0.680445000  | 1.012103000  | 1  | 5.811735000  | -1.104846000 | 4.764487000  |
| 1  | 3.556032000  | 2.380611000  | 1.046720000  | 1  | -0.557987000 | 3.066790000  | 0.583691000  |
| 6  | 4.984332000  | 1.787449000  | 2.559708000  | 1  | -3.897966000 | 5.204439000  | 3.271587000  |
| 1  | 4.804784000  | 2.686318000  | 3.151593000  | 1  | -2.773656000 | 1.493373000  | -2.365709000 |
| 6  | 5.321801000  | 0.662131000  | 3.430469000  | 15 | 1.569648000  | 2.745145000  | -2.426983000 |
| 6  | -3.094752000 | -0.087948000 | -0.929938000 | 6  | 2.864977000  | 3.818810000  | -1.586116000 |
| 1  | -3.828025000 | 0.554277000  | -0.440001000 | 6  | 2.601017000  | 4.261573000  | -0.279942000 |
| 1  | -3.639967000 | -0.784667000 | -1.575229000 | 6  | 4.087390000  | 4.132458000  | -2.189309000 |
| 6  | -2.155569000 | 0.792971000  | -1.795730000 | 6  | 3.544086000  | 5.026419000  | 0.410510000  |
| 6  | -1.164885000 | 1.534386000  | -0.994741000 | 6  | 5.032052000  | 4.894441000  | -1.493783000 |
| 45 | 0.940929000  | 1.020151000  | -0.849795000 | 6  | 4.761774000  | 5.344962000  | -0.198838000 |
| 17 | 3.031111000  | -0.143223000 | -1.263984000 | 1  | 1.680059000  | 3.986801000  | 0.215772000  |
| 16 | 1.635502000  | 2.534080000  | 3.228329000  | 1  | 4.312556000  | 3.774533000  | -3.183193000 |
| 16 | -3.239189000 | -1.180799000 | 1.627395000  | 1  | 3.335077000  | 5.318318000  | 1.429390000  |
| 8  | 0.159555000  | 2.859332000  | 2.574566000  | 1  | 5.978878000  | 5.126198000  | -1.963212000 |
| 8  | 2.695446000  | 3.786879000  | 3.306826000  | 1  | 5.498870000  | 5.926977000  | 0.338003000  |
| 8  | -2.120956000 | -1.924233000 | 2.571558000  | 6  | 0.184805000  | 3.946336000  | -2.879123000 |
| 8  | -4.677497000 | -1.901775000 | 1.311333000  | 6  | -0.816184000 | 3.475238000  | -3.740553000 |
| 6  | -3.634686000 | 0.537133000  | 2.269839000  | 6  | 0.091649000  | 5.238293000  | -2.356572000 |
| 6  | -4.961450000 | 0.849201000  | 2.523388000  | 6  | -1.899246000 | 4.288308000  | -4.074006000 |
| 6  | -2.584614000 | 1.420505000  | 2.465396000  | 6  | -0.997619000 | 6.052416000  | -2.689882000 |
| 6  | -5.245143000 | 2.131918000  | 3.000507000  | 6  | -1.994448000 | 5.580622000  | -3.545236000 |
| 1  | -5.734033000 | 0.115783000  | 2.343666000  | 1  | -0.744174000 | 2.478480000  | -4.156214000 |
| 6  | -2.892608000 | 2.698302000  | 2.933894000  | 1  | 0.859247000  | 5.617235000  | -1.698017000 |
| 1  | -1.565050000 | 1.156028000  | 2.231294000  | 1  | -2.663424000 | 3.917664000  | -4.744575000 |
| 6  | -4.220262000 | 3.068926000  | 3.211563000  | 1  | -1.059846000 | 7.052600000  | -2.282115000 |
| 1  | -6.272198000 | 2.405595000  | 3.203183000  | 1  | -2.834843000 | 6.211586000  | -3.801677000 |
| 1  | -2.083691000 | 3.403748000  | 3.064989000  | 6  | 2.248516000  | 2.360318000  | -4.137197000 |
| 6  | 1.281085000  | 1.781553000  | 4.912226000  | 6  | 2.594002000  | 1.050142000  | -4.485093000 |
| 6  | 2.353823000  | 1.299496000  | 5.649411000  | 6  | 2.387267000  | 3.393007000  | -5.078030000 |
| 6  | -0.032635000 | 1.738763000  | 5.351480000  | 6  | 3.079534000  | 0.777150000  | -5.768793000 |
| 6  | 2.080410000  | 0.740975000  | 6.897852000  | 6  | 2.875095000  | 3.115277000  | -6.355669000 |
| 1  | 3.358054000  | 1.319178000  | 5.253198000  | 6  | 3.222642000  | 1.805095000  | -6.702756000 |
| 6  | -0.281028000 | 1.171663000  | 6.603399000  | 1  | 2.503384000  | 0.257912000  | -3.758350000 |
| 1  | -0.829395000 | 2.114543000  | 4.729256000  | 1  | 2.102945000  | 4.403632000  | -4.818228000 |
| 6  | 0.766098000  | 0.671193000  | 7.393198000  | 1  | 3.346994000  | -0.237624000 | -6.030588000 |
| 1  | 2.896900000  | 0.346924000  | 7.488215000  | 1  | 2.979829000  | 3.915608000  | -7.076098000 |
| 1  | -1.300139000 | 1.109147000  | 6.960458000  | 1  | 3.599283000  | 1.589871000  | -7.693933000 |

C

Zero-point correction= 0.485617 (Hartree/Particle)  
Thermal correction to Energy= 0.525070  
Thermal correction to Enthalpy= 0.526014  
Thermal correction to Gibbs Free Energy= 0.407581  
Sum of electronic and zero-point Energies= -2784.245166  
Sum of electronic and thermal Energies= -2784.205714  
Sum of electronic and thermal Enthalpies= -2784.204769  
Sum of electronic and thermal Free Energies= -2784.323202

|   |              |              |              |   |              |              |              |
|---|--------------|--------------|--------------|---|--------------|--------------|--------------|
| 6 | 0.962964000  | 0.596539000  | 2.378148000  | 1 | -0.424840000 | -2.726886000 | 0.117887000  |
| 1 | 1.020373000  | -0.173733000 | 3.153362000  | 1 | -0.152918000 | -2.065052000 | -1.497528000 |
| 1 | 0.110837000  | 1.237646000  | 2.635486000  | 7 | -1.895298000 | -1.339055000 | -0.459549000 |
| 6 | 0.716762000  | -0.011772000 | 1.058358000  | 7 | 2.192436000  | 1.395497000  | 2.416185000  |
| 6 | 0.327586000  | -0.747913000 | 0.126617000  | 6 | 2.229049000  | 2.838423000  | 2.169205000  |
| 6 | -0.482428000 | -1.817938000 | -0.486034000 | 1 | 1.197780000  | 3.188123000  | 2.096982000  |

|    |              |              |              |   |              |              |              |
|----|--------------|--------------|--------------|---|--------------|--------------|--------------|
| 1  | 2.694741000  | 3.338555000  | 3.019323000  | 1 | -3.972983000 | 0.059392000  | 4.197072000  |
| 6  | 3.024641000  | 3.232729000  | 0.898048000  | 6 | 4.599275000  | -0.244936000 | 2.374811000  |
| 1  | 3.944594000  | 2.646156000  | 0.875491000  | 6 | 5.666081000  | 0.401029000  | 1.772995000  |
| 6  | 2.339185000  | 3.070186000  | -0.388209000 | 6 | 4.246285000  | -1.558533000 | 2.115181000  |
| 6  | -2.482299000 | -0.682756000 | -1.650503000 | 6 | 6.414311000  | -0.319858000 | 0.843609000  |
| 1  | -3.417408000 | -0.224559000 | -1.326948000 | 1 | 5.909992000  | 1.420089000  | 2.035243000  |
| 1  | -2.716696000 | -1.404780000 | -2.439213000 | 6 | 5.010306000  | -2.258092000 | 1.182915000  |
| 6  | -1.560494000 | 0.405542000  | -2.249072000 | 1 | 3.414297000  | -2.018214000 | 2.627112000  |
| 6  | -0.963597000 | 1.336401000  | -1.272148000 | 6 | 6.087284000  | -1.646773000 | 0.522771000  |
| 45 | 1.120073000  | 1.075392000  | -0.727151000 | 1 | 7.249230000  | 0.159597000  | 0.350538000  |
| 17 | 3.251905000  | 0.054100000  | -0.971735000 | 1 | 4.751172000  | -3.281922000 | 0.949666000  |
| 16 | 3.508152000  | 0.743192000  | 3.522739000  | 6 | 6.846966000  | -2.386470000 | -0.550368000 |
| 16 | -3.092440000 | -2.655696000 | 0.161779000  | 1 | 6.363945000  | -2.235770000 | -1.519931000 |
| 8  | 2.777583000  | -0.306217000 | 4.552377000  | 1 | 7.874718000  | -2.031465000 | -0.634615000 |
| 8  | 4.344474000  | 2.059283000  | 4.031705000  | 1 | 6.872893000  | -3.459784000 | -0.358351000 |
| 8  | -2.182847000 | -3.667053000 | 1.076149000  | 6 | -6.561591000 | 0.838829000  | 3.835547000  |
| 8  | -4.043927000 | -3.206994000 | -1.057665000 | 1 | -7.408341000 | 1.276691000  | 3.307066000  |
| 6  | -4.154401000 | -1.594558000 | 1.273891000  | 1 | -6.960897000 | 0.235586000  | 4.655567000  |
| 6  | -5.452391000 | -1.318387000 | 0.878276000  | 1 | 3.314453000  | 4.285960000  | 0.989205000  |
| 6  | -3.591580000 | -1.121337000 | 2.450555000  | 6 | -0.752212000 | 2.210087000  | -0.414490000 |
| 6  | -6.228325000 | -0.512116000 | 1.716621000  | 6 | 1.922873000  | 3.074036000  | -1.544776000 |
| 1  | -5.839233000 | -1.731234000 | -0.042181000 | 1 | -0.766067000 | -0.072158000 | -2.825654000 |
| 6  | -4.384190000 | -0.320937000 | 3.271312000  | 1 | 1.700455000  | 3.335131000  | -2.552689000 |
| 1  | -2.577113000 | -1.377670000 | 2.718239000  | 1 | -0.918243000 | 3.058187000  | 0.210337000  |
| 6  | -5.709300000 | -0.004913000 | 2.917739000  | 1 | -5.984603000 | 1.650712000  | 4.280885000  |
| 1  | -7.246545000 | -0.281095000 | 1.433582000  | 1 | -2.160501000 | 0.970728000  | -2.969679000 |

## TS1

Frequency -330.1960

Zero-point correction= 0.486237 (Hartree/Particle)  
 Thermal correction to Energy= 0.524299  
 Thermal correction to Enthalpy= 0.525243  
 Thermal correction to Gibbs Free Energy= 0.412223  
 Sum of electronic and zero-point Energies= -2784.230055  
 Sum of electronic and thermal Energies= -2784.191993  
 Sum of electronic and thermal Enthalpies= -2784.191049  
 Sum of electronic and thermal Free Energies= -2784.304069

|    |              |              |              |    |              |              |              |
|----|--------------|--------------|--------------|----|--------------|--------------|--------------|
| 6  | 1.489810000  | 2.337028000  | 1.923402000  | 16 | -1.461794000 | -2.557175000 | 0.186948000  |
| 1  | 1.028726000  | 1.703536000  | 2.687319000  | 8  | 2.402630000  | 1.243503000  | 4.711748000  |
| 1  | 1.034662000  | 3.327849000  | 2.029065000  | 8  | 5.054519000  | 1.730002000  | 3.778615000  |
| 6  | 1.208958000  | 1.805088000  | 0.573149000  | 8  | -0.235351000 | -3.088771000 | 1.141230000  |
| 6  | 0.749614000  | 0.850929000  | -0.163358000 | 8  | -1.970246000 | -3.415898000 | -1.118393000 |
| 6  | 0.490542000  | -0.600017000 | -0.252677000 | 6  | -2.950145000 | -2.217009000 | 1.262074000  |
| 1  | 0.859744000  | -1.089868000 | 0.646316000  | 6  | -4.207162000 | -2.500112000 | 0.754587000  |
| 1  | 1.021282000  | -1.036534000 | -1.103824000 | 6  | -2.731708000 | -1.685834000 | 2.525420000  |
| 7  | -0.988145000 | -0.793186000 | -0.308199000 | 6  | -5.311032000 | -2.226656000 | 1.567687000  |
| 7  | 2.940652000  | 2.431157000  | 2.154001000  | 1  | -4.312813000 | -2.932455000 | -0.229817000 |
| 6  | 3.640521000  | 3.715086000  | 2.061452000  | 6  | -3.847257000 | -1.421891000 | 3.318013000  |
| 1  | 3.001754000  | 4.531174000  | 2.416769000  | 1  | -1.728606000 | -1.498837000 | 2.879320000  |
| 1  | 4.518647000  | 3.661715000  | 2.705922000  | 6  | -5.148805000 | -1.686005000 | 2.852525000  |
| 6  | 4.137046000  | 3.999350000  | 0.622456000  | 1  | -6.305071000 | -2.440340000 | 1.198414000  |
| 1  | 4.726948000  | 3.151972000  | 0.276257000  | 1  | -3.707208000 | -1.008499000 | 4.308017000  |
| 6  | 3.072089000  | 4.281815000  | -0.344728000 | 6  | 3.354740000  | -0.337223000 | 2.574768000  |
| 6  | -1.694297000 | -0.404299000 | -1.563778000 | 6  | 4.001620000  | -0.464354000 | 1.357745000  |
| 1  | -2.610930000 | 0.107522000  | -1.272619000 | 6  | 2.570601000  | -1.334421000 | 3.143306000  |
| 1  | -1.960758000 | -1.290017000 | -2.146911000 | 6  | 3.841012000  | -1.666101000 | 0.664099000  |
| 6  | -0.843341000 | 0.514749000  | -2.464387000 | 1  | 4.559399000  | 0.349909000  | 0.924228000  |
| 6  | -0.278443000 | 1.714465000  | -1.794805000 | 6  | 2.428919000  | -2.525743000 | 2.432711000  |
| 45 | 1.659379000  | 2.541561000  | -1.208048000 | 1  | 2.080946000  | -1.167923000 | 4.091384000  |
| 17 | 3.786184000  | 1.350689000  | -1.582682000 | 6  | 3.059890000  | -2.708338000 | 1.187317000  |
| 16 | 3.506018000  | 1.287474000  | 3.493650000  | 1  | 4.305997000  | -1.768350000 | -0.306121000 |



|   |              |              |              |   |              |              |              |
|---|--------------|--------------|--------------|---|--------------|--------------|--------------|
| 1 | 1.790597000  | -3.305620000 | 2.821588000  | 1 | 4.798924000  | 4.872210000  | 0.656505000  |
| 6 | 2.848022000  | -3.990379000 | 0.423082000  | 6 | -0.276400000 | 3.000052000  | -1.649948000 |
| 1 | 3.331422000  | -3.960798000 | -0.553187000 | 6 | 2.232880000  | 4.739939000  | -1.119262000 |
| 1 | 3.252059000  | -4.845015000 | 0.971534000  | 1 | -0.034621000 | -0.059620000 | -2.920351000 |
| 1 | 1.780154000  | -4.164579000 | 0.282476000  | 1 | 1.653459000  | 5.428363000  | -1.688417000 |
| 6 | -6.341824000 | -1.416474000 | 3.738245000  | 1 | -0.889885000 | 3.865406000  | -1.827078000 |
| 1 | -7.268864000 | -1.389413000 | 3.165915000  | 1 | -6.240684000 | -0.464805000 | 4.262454000  |
| 1 | -6.444832000 | -2.196589000 | 4.497455000  | 1 | -1.482998000 | 0.853678000  | -3.284541000 |

#### D

Zero-point correction= 0.490473 (Hartree/Particle)  
Thermal correction to Energy= 0.528040  
Thermal correction to Enthalpy= 0.528984  
Thermal correction to Gibbs Free Energy= 0.417933  
Sum of electronic and zero-point Energies= -2784.308498  
Sum of electronic and thermal Energies= -2784.270932  
Sum of electronic and thermal Enthalpies= -2784.269987  
Sum of electronic and thermal Free Energies= -2784.381039

|    |              |              |              |   |              |              |              |
|----|--------------|--------------|--------------|---|--------------|--------------|--------------|
| 6  | 2.317549000  | 3.065470000  | 2.225929000  | 6 | -5.192154000 | -2.954639000 | 0.510769000  |
| 1  | 2.155584000  | 2.671902000  | 3.234158000  | 1 | -3.326338000 | -3.305193000 | -0.551586000 |
| 1  | 2.396761000  | 4.152167000  | 2.317621000  | 6 | -4.969315000 | -1.862097000 | 2.658365000  |
| 6  | 1.179990000  | 2.721281000  | 1.325189000  | 1 | -2.946784000 | -1.365558000 | 3.253390000  |
| 6  | 0.491360000  | 1.445441000  | 0.941226000  | 6 | -5.789814000 | -2.439323000 | 1.671780000  |
| 6  | 0.434611000  | -0.015387000 | 1.223315000  | 1 | -5.809853000 | -3.404387000 | -0.254977000 |
| 1  | 0.609742000  | -0.242679000 | 2.270812000  | 1 | -5.416979000 | -1.464359000 | 3.559537000  |
| 1  | 1.156654000  | -0.566762000 | 0.619174000  | 6 | 3.752196000  | -0.361038000 | 2.111911000  |
| 7  | -0.980471000 | -0.400144000 | 0.893572000  | 6 | 3.941086000  | -0.601783000 | 0.759044000  |
| 7  | 3.580964000  | 2.519091000  | 1.679702000  | 6 | 3.143842000  | -1.261559000 | 2.975872000  |
| 6  | 4.558645000  | 3.428487000  | 1.056701000  | 6 | 3.481745000  | -1.814772000 | 0.247399000  |
| 1  | 4.348968000  | 4.458999000  | 1.356665000  | 1 | 4.380138000  | 0.135650000  | 0.107060000  |
| 1  | 5.555074000  | 3.169941000  | 1.420672000  | 6 | 2.693182000  | -2.469346000 | 2.439716000  |
| 6  | 4.575624000  | 3.311046000  | -0.484406000 | 1 | 3.010843000  | -1.014790000 | 4.018800000  |
| 1  | 4.777829000  | 2.276431000  | -0.763861000 | 6 | 2.856560000  | -2.765055000 | 1.075611000  |
| 6  | 3.343991000  | 3.755169000  | -1.143807000 | 1 | 3.577447000  | -2.000550000 | -0.812742000 |
| 6  | -1.461447000 | 0.055539000  | -0.448261000 | 1 | 2.172047000  | -3.168738000 | 3.075596000  |
| 1  | -2.389861000 | -0.463502000 | -0.677443000 | 6 | 2.318924000  | -4.046233000 | 0.492053000  |
| 1  | -0.727751000 | -0.165886000 | -1.227381000 | 1 | 1.353627000  | -3.868268000 | 0.011443000  |
| 6  | -1.725036000 | 1.579649000  | -0.354577000 | 1 | 2.997738000  | -4.453517000 | -0.259024000 |
| 6  | -0.516168000 | 2.193432000  | 0.256058000  | 1 | 2.164479000  | -4.800311000 | 1.263221000  |
| 45 | 1.437703000  | 2.412684000  | -0.710134000 | 6 | -7.283024000 | -2.529148000 | 1.878742000  |
| 17 | 2.298301000  | 0.696811000  | -2.146555000 | 1 | -7.812785000 | -2.645817000 | 0.933336000  |
| 16 | 4.370535000  | 1.249700000  | 2.833999000  | 1 | -7.535185000 | -3.388936000 | 2.505715000  |
| 16 | -1.194862000 | -2.238971000 | 1.099683000  | 1 | 5.407312000  | 3.915060000  | -0.864564000 |
| 8  | 3.699248000  | 1.403677000  | 4.326589000  | 6 | 0.145926000  | 3.472579000  | 0.599702000  |
| 8  | 5.986507000  | 1.411811000  | 2.612832000  | 6 | 2.417200000  | 4.256872000  | -1.768627000 |
| 8  | -0.430895000 | -2.589042000 | 2.507585000  | 1 | -1.949586000 | 1.984539000  | -1.343264000 |
| 8  | -0.837228000 | -3.072115000 | -0.271672000 | 1 | 1.780296000  | 4.836156000  | -2.393466000 |
| 6  | -3.047900000 | -2.317637000 | 1.328872000  | 1 | -0.125132000 | 4.511218000  | 0.534084000  |
| 6  | -3.807638000 | -2.900860000 | 0.327327000  | 1 | -7.671047000 | -1.639122000 | 2.376169000  |
| 6  | -3.585864000 | -1.797192000 | 2.497497000  | 1 | -2.592859000 | 1.755468000  | 0.287928000  |

#### E

Zero-point correction= 0.491197 (Hartree/Particle)  
Thermal correction to Energy= 0.528086  
Thermal correction to Enthalpy= 0.529030  
Thermal correction to Gibbs Free Energy= 0.418775  
Sum of electronic and zero-point Energies= -2784.343376  
Sum of electronic and thermal Energies= -2784.306487  
Sum of electronic and thermal Enthalpies= -2784.305543

Sum of electronic and thermal Free Energies= -2784.415798

---

|    |              |              |              |   |              |              |              |
|----|--------------|--------------|--------------|---|--------------|--------------|--------------|
| 6  | 1.542666000  | 2.130688000  | 1.703355000  | 6 | -6.030059000 | -2.379663000 | -0.552660000 |
| 1  | 0.571030000  | 2.217237000  | 2.198803000  | 1 | -5.424782000 | -3.243887000 | -2.430997000 |
| 1  | 2.050651000  | 3.085366000  | 1.856091000  | 1 | -6.303689000 | -1.387183000 | 1.342884000  |
| 6  | 1.377022000  | 1.853146000  | 0.245085000  | 6 | 4.388975000  | 2.979553000  | 3.182114000  |
| 6  | 0.235464000  | 1.875572000  | -0.474055000 | 6 | 4.282120000  | 3.078763000  | 4.563140000  |
| 6  | -1.151787000 | 2.017407000  | 0.096066000  | 6 | 4.695926000  | 4.041707000  | 2.346351000  |
| 1  | -1.536929000 | 3.039195000  | 0.012881000  | 6 | 4.493051000  | 4.332908000  | 5.133969000  |
| 1  | -1.206207000 | 1.722301000  | 1.139702000  | 1 | 4.054611000  | 2.212280000  | 5.166292000  |
| 7  | -2.136223000 | 1.197683000  | -0.661956000 | 6 | 4.898654000  | 5.287328000  | 2.946482000  |
| 7  | 2.268471000  | 1.097977000  | 2.502403000  | 1 | 4.758659000  | 3.906634000  | 1.275564000  |
| 6  | 1.849136000  | -0.321507000 | 2.322749000  | 6 | 4.803138000  | 5.450806000  | 4.337326000  |
| 1  | 0.784988000  | -0.282640000 | 2.085826000  | 1 | 4.417591000  | 4.444857000  | 6.207413000  |
| 6  | -2.168822000 | 1.542912000  | -2.110949000 | 1 | 5.130021000  | 6.136812000  | 2.318470000  |
| 1  | -2.630935000 | 2.533523000  | -2.119616000 | 6 | 5.058228000  | 6.795980000  | 4.974075000  |
| 1  | -2.865529000 | 0.864024000  | -2.601332000 | 1 | 6.107270000  | 6.890428000  | 5.268832000  |
| 6  | -0.802329000 | 1.565366000  | -2.846905000 | 1 | 4.837106000  | 7.611871000  | 4.285784000  |
| 6  | 0.397752000  | 1.713850000  | -1.921975000 | 1 | 4.453304000  | 6.935541000  | 5.870869000  |
| 45 | 3.021569000  | 1.491216000  | -0.809267000 | 6 | -7.423889000 | -2.960725000 | -0.581480000 |
| 17 | 3.561818000  | 3.788113000  | -1.086562000 | 1 | -7.707180000 | -3.273848000 | -1.586286000 |
| 16 | 4.102951000  | 1.303803000  | 2.412594000  | 1 | -7.492299000 | -3.837154000 | 0.068929000  |
| 16 | -1.730801000 | -0.648197000 | -0.405661000 | 6 | 1.683631000  | 1.605435000  | -2.312238000 |
| 8  | 4.593183000  | 1.446321000  | 0.809908000  | 6 | 2.634554000  | -0.582184000 | -1.364856000 |
| 8  | 4.744355000  | 0.113699000  | 3.333255000  | 1 | -0.690906000 | 0.624976000  | -3.385697000 |
| 8  | -1.170303000 | -0.752663000 | 1.139923000  | 1 | 1.998151000  | 1.506078000  | -3.348975000 |
| 8  | -0.909695000 | -1.336774000 | -1.652259000 | 1 | -8.163419000 | -2.238326000 | -0.232223000 |
| 6  | -3.463918000 | -1.346370000 | -0.461781000 | 1 | -0.823313000 | 2.368369000  | -3.588479000 |
| 6  | -3.821140000 | -2.120632000 | -1.553561000 | 1 | 2.484018000  | -0.904764000 | -2.369040000 |
| 6  | -4.322985000 | -1.065505000 | 0.591203000  | 6 | 2.609489000  | -0.599894000 | -0.125013000 |
| 6  | -5.120292000 | -2.635701000 | -1.589707000 | 1 | 1.984143000  | -0.824386000 | 3.277009000  |
| 1  | -3.100860000 | -2.320963000 | -2.333391000 | 6 | 2.578857000  | -1.146752000 | 1.240187000  |
| 6  | -5.613004000 | -1.590465000 | 0.535049000  | 1 | 3.602965000  | -1.337420000 | 1.570743000  |
| 1  | -3.991339000 | -0.467056000 | 1.426399000  | 1 | 2.077293000  | -2.117839000 | 1.191252000  |

---

## TS2

Frequency -329.1158

Zero-point correction= 0.489711 (Hartree/Particle)  
Thermal correction to Energy= 0.526040  
Thermal correction to Enthalpy= 0.526984  
Thermal correction to Gibbs Free Energy= 0.417517  
Sum of electronic and zero-point Energies= -2784.326472  
Sum of electronic and thermal Energies= -2784.290142  
Sum of electronic and thermal Enthalpies= -2784.289198  
Sum of electronic and thermal Free Energies= -2784.398665

---

|   |              |              |              |    |              |              |              |
|---|--------------|--------------|--------------|----|--------------|--------------|--------------|
| 6 | 1.735244000  | 1.936294000  | 1.712861000  | 6  | -0.644005000 | 1.014921000  | -2.745411000 |
| 1 | 0.775458000  | 1.865169000  | 2.235381000  | 6  | 0.538554000  | 1.393393000  | -1.873756000 |
| 1 | 2.052572000  | 2.979556000  | 1.785406000  | 45 | 3.191458000  | 1.796712000  | -0.957657000 |
| 6 | 1.608020000  | 1.543029000  | 0.261189000  | 17 | 3.260369000  | 4.197944000  | -1.084979000 |
| 6 | 0.423154000  | 1.441916000  | -0.435461000 | 16 | 4.464617000  | 1.529619000  | 2.192357000  |
| 6 | -0.943654000 | 1.494206000  | 0.205437000  | 16 | -1.875614000 | -1.059135000 | -0.350013000 |
| 1 | -1.293509000 | 2.528557000  | 0.295287000  | 8  | 4.811298000  | 1.872504000  | 0.593010000  |
| 1 | -0.954050000 | 1.059516000  | 1.202232000  | 8  | 5.321396000  | 0.369979000  | 2.962534000  |
| 7 | -1.998931000 | 0.816529000  | -0.586696000 | 8  | -1.421509000 | -1.229515000 | 1.225163000  |
| 7 | 2.659501000  | 1.120841000  | 2.540761000  | 8  | -1.049880000 | -1.865377000 | -1.521539000 |
| 6 | 2.401262000  | -0.331712000 | 2.632321000  | 6  | -3.678568000 | -1.505198000 | -0.549138000 |
| 1 | 1.645402000  | -0.448555000 | 3.411900000  | 6  | -4.030003000 | -2.330513000 | -1.605037000 |
| 6 | -1.996885000 | 1.193177000  | -2.029148000 | 6  | -4.590017000 | -1.007866000 | 0.371928000  |
| 1 | -2.298195000 | 2.244369000  | -2.024358000 | 6  | -5.379278000 | -2.667601000 | -1.745576000 |
| 1 | -2.787609000 | 0.631430000  | -2.526430000 | 1  | -3.271168000 | -2.696892000 | -2.281170000 |

|   |              |              |              |   |              |              |              |
|---|--------------|--------------|--------------|---|--------------|--------------|--------------|
| 6 | -5.929734000 | -1.357640000 | 0.212166000  | 1 | 4.467560000  | 7.732698000  | 4.514786000  |
| 1 | -4.264846000 | -0.370672000 | 1.180360000  | 1 | 4.399749000  | 6.896862000  | 6.068497000  |
| 6 | -6.343080000 | -2.190056000 | -0.844433000 | 6 | -7.795661000 | -2.579193000 | -0.983176000 |
| 1 | -5.681298000 | -3.309163000 | -2.562488000 | 1 | -8.018056000 | -2.949218000 | -1.983880000 |
| 1 | -6.662678000 | -0.981886000 | 0.913893000  | 1 | -8.054229000 | -3.370173000 | -0.273740000 |
| 6 | 4.599597000  | 3.173900000  | 3.069654000  | 6 | 1.802456000  | 1.649712000  | -2.327455000 |
| 6 | 4.663939000  | 3.161250000  | 4.456358000  | 6 | 3.357507000  | -0.281142000 | -0.803097000 |
| 6 | 4.620455000  | 4.326430000  | 2.300486000  | 1 | -0.543984000 | -0.033141000 | -3.032303000 |
| 6 | 4.752878000  | 4.390970000  | 5.106576000  | 1 | 2.019423000  | 1.779635000  | -3.388149000 |
| 1 | 4.655692000  | 2.230250000  | 5.003699000  | 1 | -8.455215000 | -1.733594000 | -0.781686000 |
| 6 | 4.702692000  | 5.545347000  | 2.980022000  | 1 | -0.649578000 | 1.608362000  | -3.662907000 |
| 1 | 4.563225000  | 4.280105000  | 1.221538000  | 1 | 4.063677000  | -0.852165000 | -1.378156000 |
| 6 | 4.772798000  | 5.596480000  | 4.380609000  | 6 | 2.525347000  | -0.455741000 | 0.130489000  |
| 1 | 4.807664000  | 4.415633000  | 6.186884000  | 1 | 3.318269000  | -0.795540000 | 2.992995000  |
| 1 | 4.710614000  | 6.461620000  | 2.405518000  | 6 | 1.907230000  | -1.029821000 | 1.327370000  |
| 6 | 4.898337000  | 6.919076000  | 5.098575000  | 1 | 2.198841000  | -2.085964000 | 1.371681000  |
| 1 | 5.949484000  | 7.163554000  | 5.276443000  | 1 | 0.820438000  | -1.012417000 | 1.260128000  |

F

Zero-point correction= 0.493676 (Hartree/Particle)  
Thermal correction to Energy= 0.530417  
Thermal correction to Enthalpy= 0.531361  
Thermal correction to Gibbs Free Energy= 0.418091  
Sum of electronic and zero-point Energies= -2784.325944  
Sum of electronic and thermal Energies= -2784.289202  
Sum of electronic and thermal Enthalpies= -2784.288258  
Sum of electronic and thermal Free Energies= -2784.401528

|    |              |              |              |   |              |              |              |
|----|--------------|--------------|--------------|---|--------------|--------------|--------------|
| 6  | 1.900559000  | 0.131536000  | 1.741123000  | 1 | -2.870527000 | -3.082474000 | -4.739080000 |
| 1  | 2.043159000  | -0.614798000 | 0.966879000  | 1 | -5.642907000 | -4.913747000 | -2.013179000 |
| 1  | 1.427335000  | -0.363802000 | 2.601547000  | 6 | 4.244276000  | -1.971246000 | 1.331044000  |
| 6  | 0.970287000  | 1.229853000  | 1.209604000  | 6 | 5.216190000  | -1.717490000 | 0.376374000  |
| 6  | -0.257625000 | 0.712172000  | 0.697253000  | 6 | 3.247570000  | -2.927109000 | 1.182187000  |
| 6  | -0.298868000 | -0.823038000 | 0.639944000  | 6 | 5.175315000  | -2.470754000 | -0.799279000 |
| 1  | -0.178419000 | -1.242069000 | 1.648181000  | 1 | 5.971048000  | -0.963877000 | 0.546970000  |
| 1  | 0.522913000  | -1.193339000 | 0.032214000  | 6 | 3.213132000  | -3.652043000 | -0.008721000 |
| 7  | -1.532933000 | -1.337900000 | 0.023752000  | 1 | 2.517898000  | -3.088436000 | 1.961940000  |
| 7  | 3.242724000  | 0.603651000  | 2.111864000  | 6 | 4.172778000  | -3.432885000 | -1.012095000 |
| 6  | 1.419714000  | 2.569032000  | 1.373965000  | 1 | 5.920867000  | -2.296802000 | -1.563706000 |
| 6  | 0.944917000  | 3.707713000  | 0.731088000  | 1 | 2.410053000  | -4.357728000 | -0.165060000 |
| 1  | 1.568348000  | 4.604990000  | 0.849705000  | 6 | 4.124063000  | -4.233647000 | -2.291166000 |
| 6  | -1.460830000 | 1.384589000  | 0.337282000  | 1 | 4.565780000  | -5.223509000 | -2.145998000 |
| 6  | -1.601646000 | 2.704138000  | -0.072030000 | 1 | 3.094698000  | -4.382099000 | -2.620388000 |
| 1  | -2.607248000 | 2.986113000  | -0.413443000 | 1 | 4.672511000  | -3.742335000 | -3.095105000 |
| 45 | -0.432868000 | 4.105052000  | -0.458628000 | 6 | -5.303566000 | -4.309939000 | -4.662514000 |
| 17 | 0.186485000  | 4.151858000  | -2.680753000 | 1 | -5.352564000 | -3.463624000 | -5.349448000 |
| 16 | 4.177230000  | -0.877231000 | 2.844959000  | 1 | -4.961107000 | -5.175414000 | -5.236372000 |
| 16 | -1.456629000 | -3.220058000 | -0.001228000 | 1 | -6.314903000 | -4.523253000 | -4.317146000 |
| 8  | 3.216540000  | -1.608340000 | 3.962021000  | 6 | -2.802450000 | 0.621616000  | 0.334660000  |
| 8  | 5.650552000  | -0.284684000 | 3.224043000  | 1 | -3.215617000 | 0.666424000  | -0.674467000 |
| 8  | -2.112191000 | -3.862720000 | 1.358704000  | 1 | -3.500409000 | 1.142097000  | 0.996155000  |
| 8  | 0.091006000  | -3.563674000 | -0.432897000 | 6 | 2.631518000  | 2.876350000  | 2.278373000  |
| 6  | -2.627344000 | -3.548378000 | -1.417153000 | 1 | 2.367762000  | 3.694826000  | 2.952833000  |
| 6  | -2.249069000 | -3.144219000 | -2.690207000 | 1 | 3.444809000  | 3.230004000  | 1.641104000  |
| 6  | -3.826800000 | -4.182932000 | -1.136624000 | 6 | 3.149558000  | 1.699941000  | 3.097111000  |
| 6  | -3.136407000 | -3.390135000 | -3.736512000 | 1 | 4.139091000  | 1.909273000  | 3.496296000  |
| 1  | -1.300555000 | -2.655832000 | -2.856210000 | 6 | -2.721234000 | -0.847084000 | 0.744500000  |
| 6  | -4.699445000 | -4.419807000 | -2.202558000 | 1 | -3.609377000 | -1.381802000 | 0.412553000  |
| 1  | -4.058311000 | -4.485092000 | -0.125367000 | 1 | -2.619345000 | -0.981490000 | 1.826321000  |
| 6  | -4.369492000 | -4.029599000 | -3.509768000 | 1 | 2.474020000  | 1.444633000  | 3.922566000  |

TS3

Frequency -249.4168

Zero-point correction= 0.492621 (Hartree/Particle)  
 Thermal correction to Energy= 0.528839  
 Thermal correction to Enthalpy= 0.529783  
 Thermal correction to Gibbs Free Energy= 0.418223  
 Sum of electronic and zero-point Energies= -2784.306637  
 Sum of electronic and thermal Energies= -2784.270419  
 Sum of electronic and thermal Enthalpies= -2784.269474  
 Sum of electronic and thermal Free Energies= -2784.381035

|    |              |              |              |   |              |              |              |
|----|--------------|--------------|--------------|---|--------------|--------------|--------------|
| 6  | 2.091559000  | 0.113409000  | 1.797236000  | 1 | -2.637264000 | -2.878670000 | -4.878404000 |
| 1  | 2.221406000  | -0.688735000 | 1.079156000  | 1 | -5.498535000 | -4.839138000 | -2.340511000 |
| 1  | 1.722986000  | -0.335781000 | 2.732797000  | 6 | 4.370323000  | -1.868200000 | 1.374780000  |
| 6  | 1.065372000  | 1.099844000  | 1.265460000  | 6 | 4.887564000  | -1.613281000 | 0.114938000  |
| 6  | -0.140464000 | 0.519032000  | 0.780885000  | 6 | 3.541810000  | -2.946113000 | 1.665204000  |
| 6  | -0.162003000 | -1.004815000 | 0.700481000  | 6 | 4.525586000  | -2.483467000 | -0.918157000 |
| 1  | -0.095051000 | -1.441328000 | 1.707728000  | 1 | 5.530140000  | -0.762390000 | -0.057690000 |
| 1  | 0.690973000  | -1.367381000 | 0.131226000  | 6 | 3.184195000  | -3.790800000 | 0.616605000  |
| 7  | -1.367341000 | -1.478421000 | -0.001799000 | 1 | 3.169719000  | -3.088069000 | 2.669446000  |
| 7  | 3.411847000  | 0.732717000  | 1.996745000  | 6 | 3.654202000  | -3.561361000 | -0.689446000 |
| 6  | 1.309999000  | 2.477086000  | 1.404350000  | 1 | 4.905258000  | -2.305272000 | -1.915223000 |
| 6  | 0.498010000  | 3.505810000  | 0.905737000  | 1 | 2.494618000  | -4.602506000 | 0.796497000  |
| 1  | 0.526633000  | 4.457309000  | 1.446117000  | 6 | 3.190040000  | -4.453303000 | -1.813303000 |
| 6  | -1.312288000 | 1.233943000  | 0.493998000  | 1 | 3.529998000  | -5.481276000 | -1.665019000 |
| 6  | -1.421818000 | 2.634908000  | 0.372014000  | 1 | 2.098926000  | -4.470264000 | -1.845199000 |
| 1  | -2.331790000 | 3.120860000  | 0.737738000  | 1 | 3.562534000  | -4.112967000 | -2.779367000 |
| 45 | -0.375872000 | 3.689486000  | -0.818886000 | 6 | -5.089528000 | -4.066310000 | -4.936306000 |
| 17 | -0.239059000 | 4.407094000  | -3.021746000 | 1 | -5.133901000 | -3.163955000 | -5.548262000 |
| 16 | 4.585598000  | -0.574634000 | 2.707728000  | 1 | -4.729074000 | -4.875928000 | -5.576641000 |
| 16 | -1.334066000 | -3.346536000 | -0.131134000 | 1 | -6.104775000 | -4.315982000 | -4.629227000 |
| 8  | 3.940119000  | -1.172893000 | 4.097442000  | 6 | -2.645833000 | 0.507017000  | 0.265600000  |
| 8  | 6.055546000  | 0.132449000  | 2.682995000  | 1 | -2.915610000 | 0.592287000  | -0.788155000 |
| 8  | -2.028922000 | -4.060366000 | 1.172505000  | 1 | -3.432103000 | 1.002018000  | 0.842573000  |
| 8  | 0.213930000  | -3.695221000 | -0.552978000 | 6 | 2.587407000  | 2.973414000  | 2.101868000  |
| 6  | -2.478587000 | -3.563366000 | -1.589446000 | 1 | 2.342973000  | 3.811640000  | 2.759363000  |
| 6  | -2.064199000 | -3.084178000 | -2.824948000 | 1 | 3.270685000  | 3.350556000  | 1.338758000  |
| 6  | -3.692939000 | -4.196101000 | -1.377611000 | 6 | 3.320106000  | 1.896723000  | 2.904855000  |
| 6  | -2.930759000 | -3.246579000 | -3.904284000 | 1 | 4.325312000  | 2.226496000  | 3.157766000  |
| 1  | -1.105226000 | -2.600927000 | -2.937388000 | 6 | -2.604401000 | -0.980203000 | 0.627392000  |
| 6  | -4.543964000 | -4.348953000 | -2.476019000 | 1 | -3.466608000 | -1.490932000 | 0.201786000  |
| 1  | -3.952349000 | -4.559517000 | -0.393620000 | 1 | -2.600764000 | -1.143928000 | 1.709868000  |
| 6  | -4.178243000 | -3.879423000 | -3.747141000 | 1 | 2.781980000  | 1.644804000  | 3.826282000  |

G

Zero-point correction= 0.496168 (Hartree/Particle)  
 Thermal correction to Energy= 0.532440  
 Thermal correction to Enthalpy= 0.533385  
 Thermal correction to Gibbs Free Energy= 0.419963  
 Sum of electronic and zero-point Energies= -2784.385414  
 Sum of electronic and thermal Energies= -2784.349142  
 Sum of electronic and thermal Enthalpies= -2784.348198  
 Sum of electronic and thermal Free Energies= -2784.46161

|   |              |              |             |   |              |              |             |
|---|--------------|--------------|-------------|---|--------------|--------------|-------------|
| 6 | 2.247433000  | 0.547838000  | 1.535248000 | 1 | 0.501283000  | -1.381282000 | 0.614228000 |
| 1 | 2.349683000  | -0.379444000 | 0.976952000 | 7 | -1.524192000 | -1.238921000 | 0.104697000 |
| 1 | 2.257522000  | 0.295613000  | 2.607651000 | 7 | 3.393131000  | 1.420508000  | 1.190377000 |
| 6 | 0.960483000  | 1.264912000  | 1.202559000 | 6 | 0.906489000  | 2.750145000  | 1.265449000 |
| 6 | -0.213769000 | 0.633172000  | 0.955968000 | 6 | -0.282840000 | 3.363573000  | 1.845098000 |
| 6 | -0.384229000 | -0.867188000 | 0.978643000 | 1 | -0.237905000 | 4.310887000  | 2.361088000 |
| 1 | -0.562223000 | -1.199634000 | 2.013491000 | 6 | -1.405731000 | 1.500689000  | 0.781977000 |

|    |              |              |              |   |              |              |              |
|----|--------------|--------------|--------------|---|--------------|--------------|--------------|
| 6  | -1.505977000 | 2.691443000  | 1.586952000  | 6 | 6.669161000  | 2.169703000  | -1.876704000 |
| 1  | -2.462037000 | 3.108297000  | 1.867090000  | 1 | 5.067353000  | 0.791567000  | -1.408529000 |
| 45 | -0.526411000 | 3.230549000  | -0.251175000 | 6 | 7.698475000  | 2.984298000  | -1.368416000 |
| 17 | 0.591967000  | 4.240877000  | -2.029910000 | 1 | 8.691465000  | 3.650262000  | 0.423670000  |
| 16 | 5.009584000  | 0.521251000  | 1.490104000  | 1 | 6.500945000  | 2.125317000  | -2.944545000 |
| 16 | -1.702673000 | -3.110424000 | 0.042782000  | 6 | 8.569213000  | 3.778848000  | -2.312292000 |
| 8  | 4.750500000  | -0.984856000 | 0.906213000  | 1 | 9.185008000  | 3.116181000  | -2.925669000 |
| 8  | 5.550778000  | 0.768972000  | 3.020853000  | 1 | 7.964488000  | 4.381714000  | -2.992849000 |
| 8  | -2.743387000 | -3.629919000 | 1.202028000  | 1 | 9.238036000  | 4.449533000  | -1.773660000 |
| 8  | -0.167965000 | -3.666618000 | -0.056828000 | 6 | -4.516333000 | -3.643072000 | -5.392007000 |
| 6  | -2.562990000 | -3.272116000 | -1.607016000 | 1 | -4.246006000 | -2.826958000 | -6.064128000 |
| 6  | -1.824667000 | -3.024274000 | -2.755835000 | 1 | -4.219977000 | -4.576514000 | -5.878201000 |
| 6  | -3.900268000 | -3.634285000 | -1.616869000 | 1 | -5.601594000 | -3.653091000 | -5.293049000 |
| 6  | -2.477603000 | -3.139714000 | -3.981824000 | 6 | -2.656726000 | 0.885931000  | 0.183034000  |
| 1  | -0.779575000 | -2.759742000 | -2.692645000 | 1 | -2.609629000 | 0.965924000  | -0.905624000 |
| 6  | -4.533779000 | -3.744130000 | -2.858192000 | 1 | -3.546216000 | 1.425329000  | 0.514474000  |
| 1  | -4.414837000 | -3.836010000 | -0.688382000 | 6 | 2.217747000  | 3.517856000  | 1.256384000  |
| 6  | -3.836547000 | -3.498987000 | -4.051264000 | 1 | 2.100810000  | 4.476583000  | 1.764976000  |
| 1  | -1.927585000 | -2.951181000 | -4.894253000 | 1 | 2.498523000  | 3.727962000  | 0.225497000  |
| 1  | -5.577232000 | -4.026836000 | -2.896266000 | 6 | 3.360625000  | 2.717232000  | 1.899943000  |
| 6  | 6.098584000  | 1.509095000  | 0.337224000  | 1 | 4.303201000  | 3.237727000  | 1.739467000  |
| 6  | 7.099288000  | 2.290092000  | 0.891453000  | 6 | -2.794095000 | -0.607197000 | 0.523929000  |
| 6  | 5.858435000  | 1.419668000  | -1.027305000 | 1 | -3.614721000 | -1.039343000 | -0.046122000 |
| 6  | 7.901767000  | 3.031700000  | 0.018952000  | 1 | -2.992337000 | -0.766623000 | 1.589183000  |
| 1  | 7.244523000  | 2.306128000  | 1.962044000  | 1 | 3.219584000  | 2.582686000  | 2.978124000  |

9

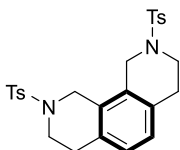

Zero-point correction= 0.495029 (Hartree/Particle)  
 Thermal correction to Energy= 0.527693  
 Thermal correction to Enthalpy= 0.528637  
 Thermal correction to Gibbs Free Energy= 0.425269  
 Sum of electronic and zero-point Energies= -2213.569087  
 Sum of electronic and thermal Energies= -2213.536422  
 Sum of electronic and thermal Enthalpies= -2213.535478  
 Sum of electronic and thermal Free Energies= -2213.638846

|    |              |              |              |   |              |              |              |
|----|--------------|--------------|--------------|---|--------------|--------------|--------------|
| 6  | 2.285661000  | 0.562771000  | 1.039017000  | 8 | -2.131259000 | -3.804845000 | 1.097472000  |
| 1  | 2.396854000  | -0.182103000 | 0.255253000  | 8 | 0.033413000  | -3.554070000 | -0.766439000 |
| 1  | 2.252786000  | 0.026457000  | 1.999088000  | 6 | -2.696496000 | -3.374658000 | -1.645479000 |
| 6  | 1.010220000  | 1.372972000  | 0.872042000  | 6 | -2.294155000 | -3.049509000 | -2.932945000 |
| 6  | -0.201085000 | 0.700683000  | 0.594732000  | 6 | -3.956474000 | -3.861717000 | -1.337062000 |
| 6  | -0.195708000 | -0.814498000 | 0.471017000  | 6 | -3.218398000 | -3.217296000 | -3.963304000 |
| 1  | -0.065795000 | -1.260338000 | 1.468407000  | 1 | -1.293651000 | -2.688841000 | -3.120323000 |
| 1  | 0.623669000  | -1.166353000 | -0.150496000 | 6 | -4.866814000 | -4.021761000 | -2.385535000 |
| 7  | -1.453269000 | -1.277123000 | -0.163415000 | 1 | -4.202300000 | -4.117703000 | -0.316439000 |
| 7  | 3.467847000  | 1.454293000  | 0.963321000  | 6 | -4.513317000 | -3.703401000 | -3.706101000 |
| 6  | 1.016219000  | 2.765248000  | 1.056851000  | 1 | -2.931830000 | -2.971846000 | -4.977468000 |
| 6  | -0.187811000 | 3.472909000  | 0.951907000  | 1 | -5.857480000 | -4.401224000 | -2.173225000 |
| 1  | -0.185832000 | 4.546285000  | 1.096705000  | 6 | 6.263491000  | 1.602018000  | 0.413430000  |
| 6  | -1.402093000 | 1.423055000  | 0.503015000  | 6 | 7.153582000  | 2.294916000  | 1.217956000  |
| 6  | -1.378181000 | 2.812244000  | 0.679312000  | 6 | 6.240071000  | 1.705246000  | -0.970133000 |
| 1  | -2.303620000 | 3.370891000  | 0.611652000  | 6 | 8.067190000  | 3.148370000  | 0.592803000  |
| 16 | 5.033057000  | 0.458263000  | 1.232373000  | 1 | 7.135824000  | 2.154927000  | 2.289274000  |
| 16 | -1.467548000 | -3.149718000 | -0.255564000 | 6 | 7.160176000  | 2.562326000  | -1.572318000 |
| 8  | 4.831704000  | -0.888464000 | 0.325130000  | 1 | 5.535003000  | 1.129624000  | -1.551278000 |
| 8  | 5.420701000  | 0.381387000  | 2.827444000  | 6 | 8.083410000  | 3.294061000  | -0.803067000 |

|   |              |              |              |   |              |              |              |
|---|--------------|--------------|--------------|---|--------------|--------------|--------------|
| 1 | 8.774410000  | 3.700892000  | 1.196966000  | 1 | -2.954965000 | 0.842342000  | -0.858488000 |
| 1 | 7.164761000  | 2.662566000  | -2.649752000 | 1 | -3.525426000 | 1.187955000  | 0.770996000  |
| 6 | 9.092178000  | 4.194013000  | -1.476782000 | 6 | 2.303541000  | 3.511111000  | 1.351637000  |
| 1 | 9.928210000  | 3.610605000  | -1.872470000 | 1 | 2.115646000  | 4.318668000  | 2.063628000  |
| 1 | 8.647526000  | 4.733980000  | -2.314242000 | 1 | 2.678078000  | 3.969458000  | 0.432158000  |
| 1 | 9.502582000  | 4.927125000  | -0.782332000 | 6 | 3.395436000  | 2.591473000  | 1.906338000  |
| 6 | -5.489978000 | -3.908055000 | -4.839965000 | 1 | 4.353835000  | 3.108073000  | 1.919898000  |
| 1 | -5.414124000 | -3.110178000 | -5.580272000 | 6 | -2.664592000 | -0.771936000 | 0.518520000  |
| 1 | -5.291567000 | -4.851533000 | -5.356159000 | 1 | -3.541121000 | -1.273829000 | 0.111871000  |
| 1 | -6.519138000 | -3.939736000 | -4.482058000 | 1 | -2.627141000 | -0.958833000 | 1.596640000  |
| 6 | -2.714923000 | 0.725689000  | 0.201981000  | 1 | 3.167482000  | 2.256947000  | 2.923605000  |

---

### III. $^1\text{H}$ , $^{13}\text{C}$ and $^{19}\text{F}$ NMR spectra of new compounds.

$^1\text{H}$  NMR spectrum of compound (*S*)-**4b** (300 MHz,  $\text{CDCl}_3$ )

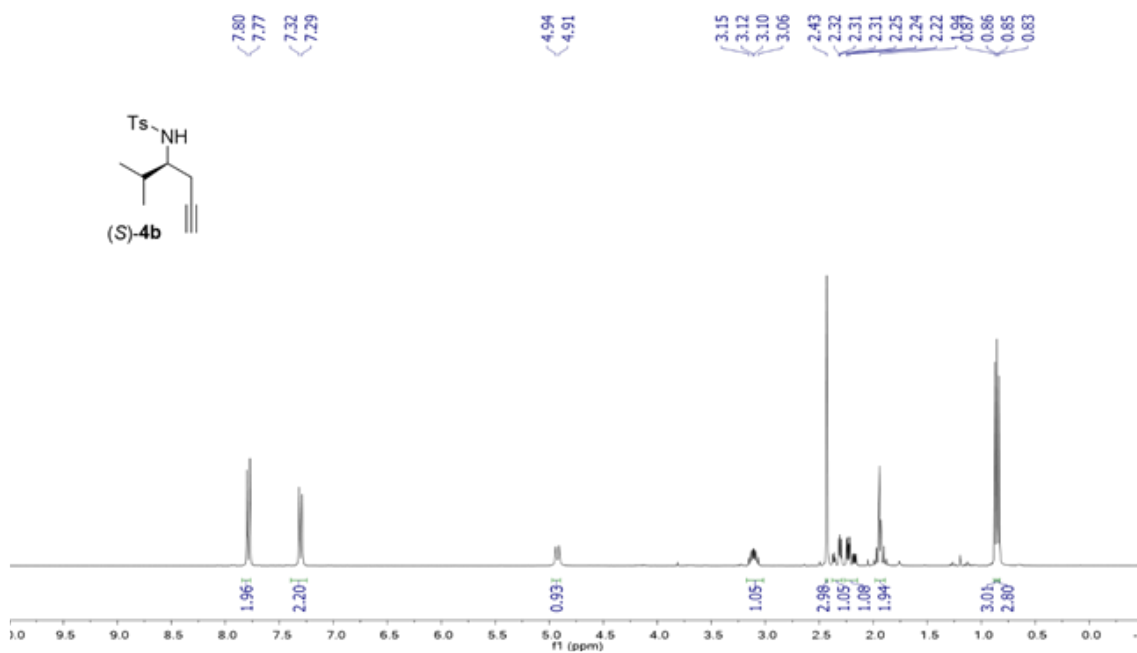

$^{13}\text{C}$  NMR spectrum of compound (*S*)-**4b** (75 MHz,  $\text{CDCl}_3$ )

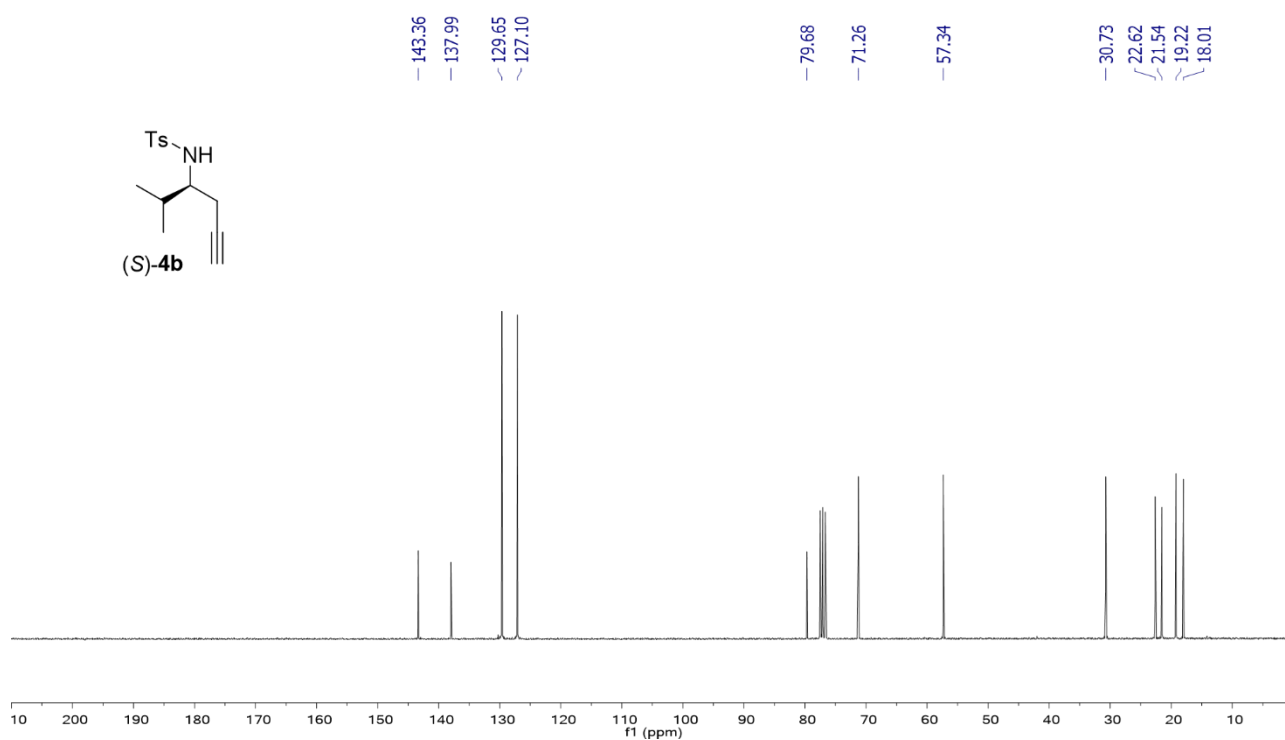

<sup>1</sup>H NMR spectrum of compound (S)-4c (300 MHz, CDCl<sub>3</sub>)

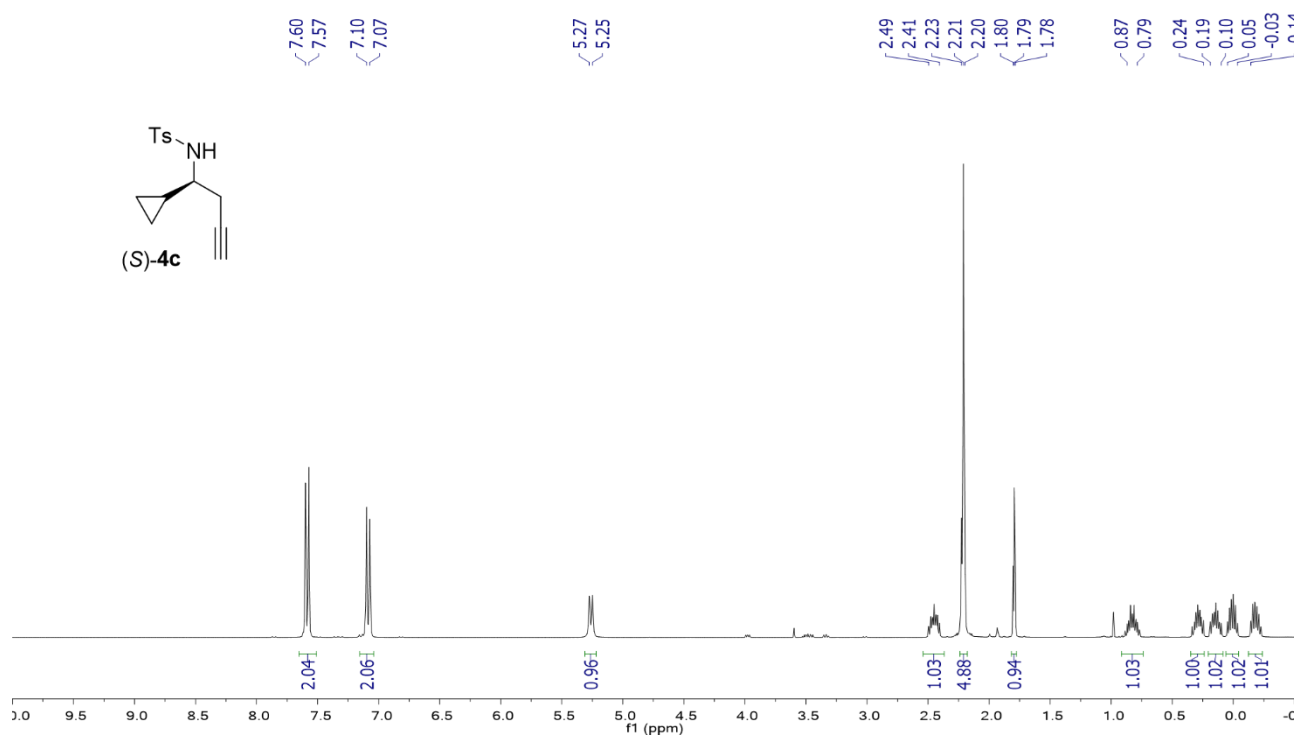

<sup>13</sup>C NMR spectrum of compound (S)-4c (75 MHz, CDCl<sub>3</sub>)

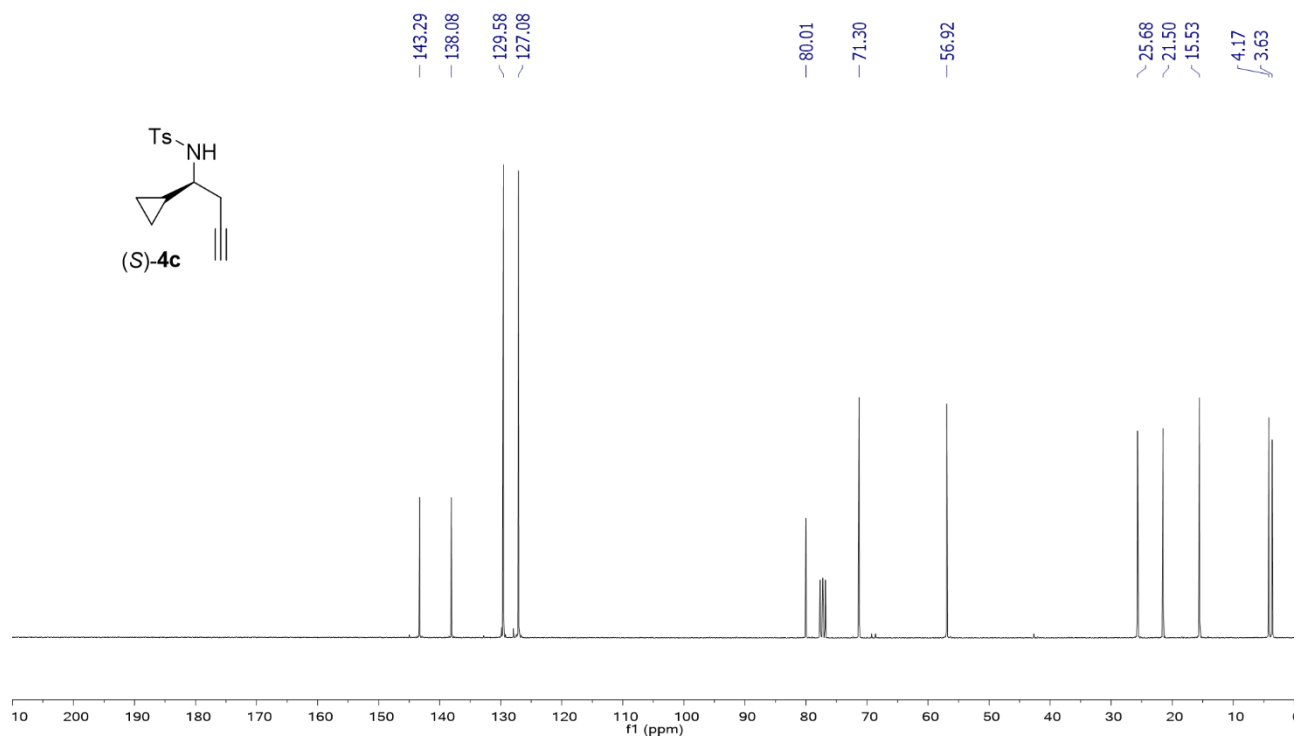



$^1\text{H}$  NMR spectrum of compound (*S*)-**4d** (300 MHz,  $\text{CDCl}_3$ )

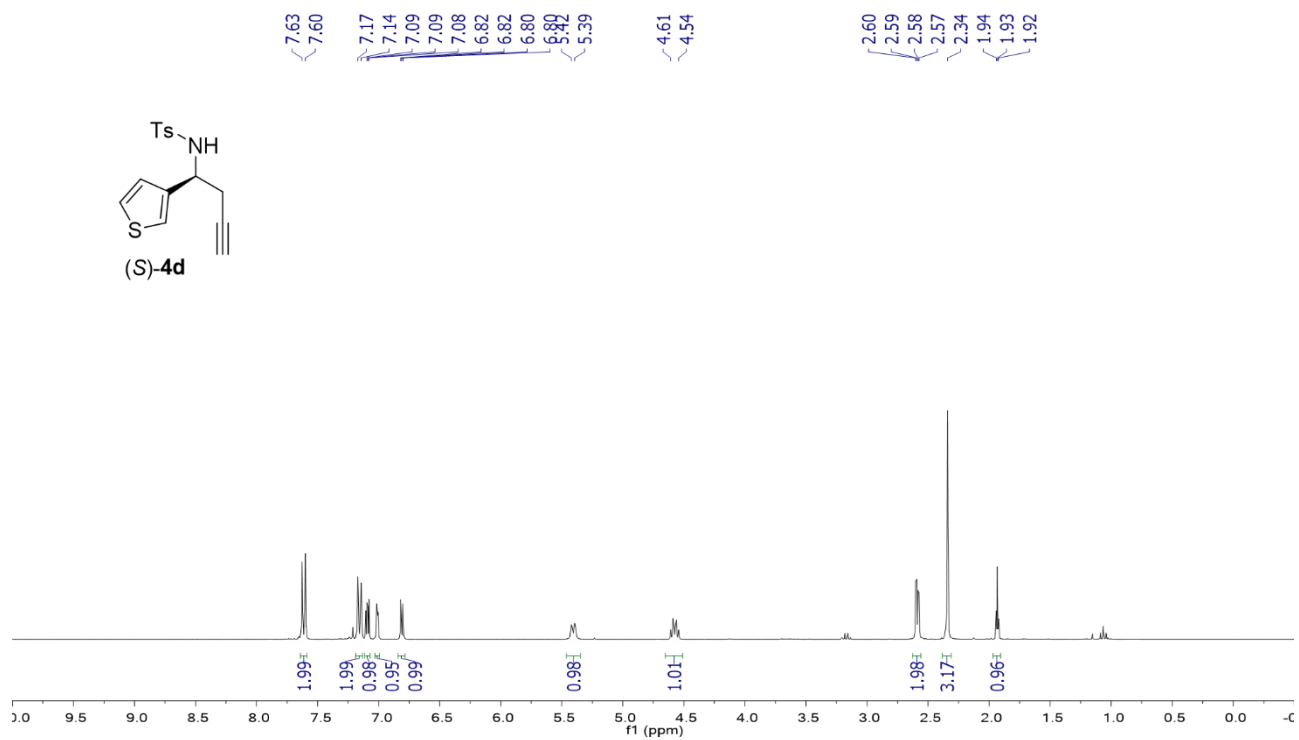

$^{13}\text{C}$  NMR spectrum of compound (*S*)-**4d** (75 MHz,  $\text{CDCl}_3$ )

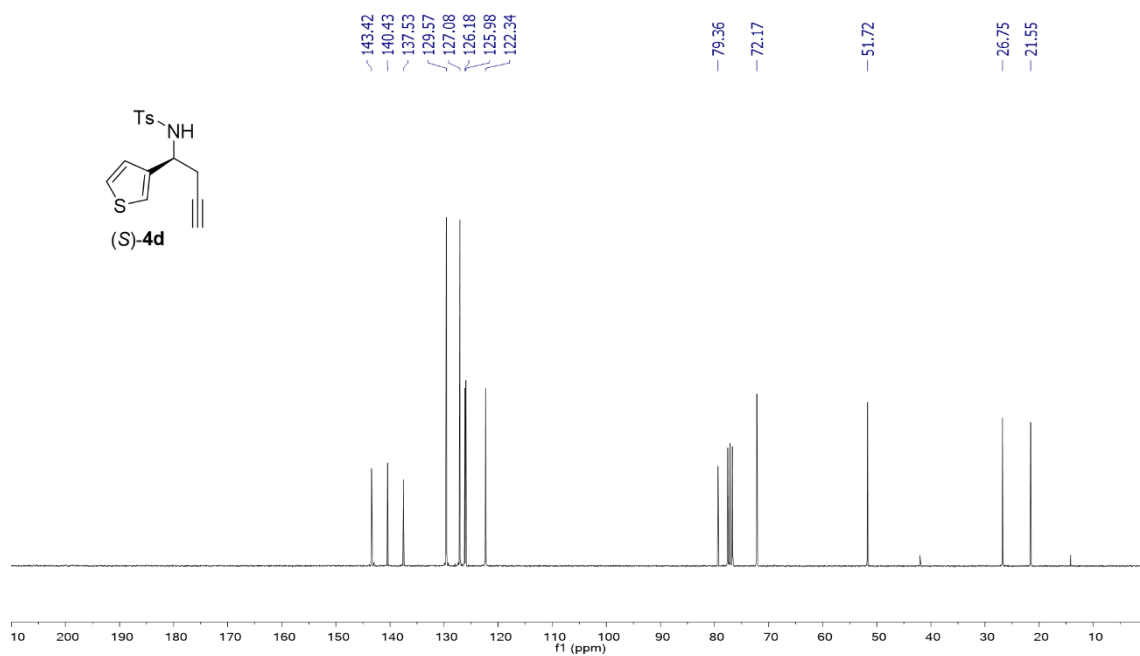

$^1\text{H}$  NMR spectrum of compound (*S*)-**4e** (300 MHz,  $\text{CDCl}_3$ )

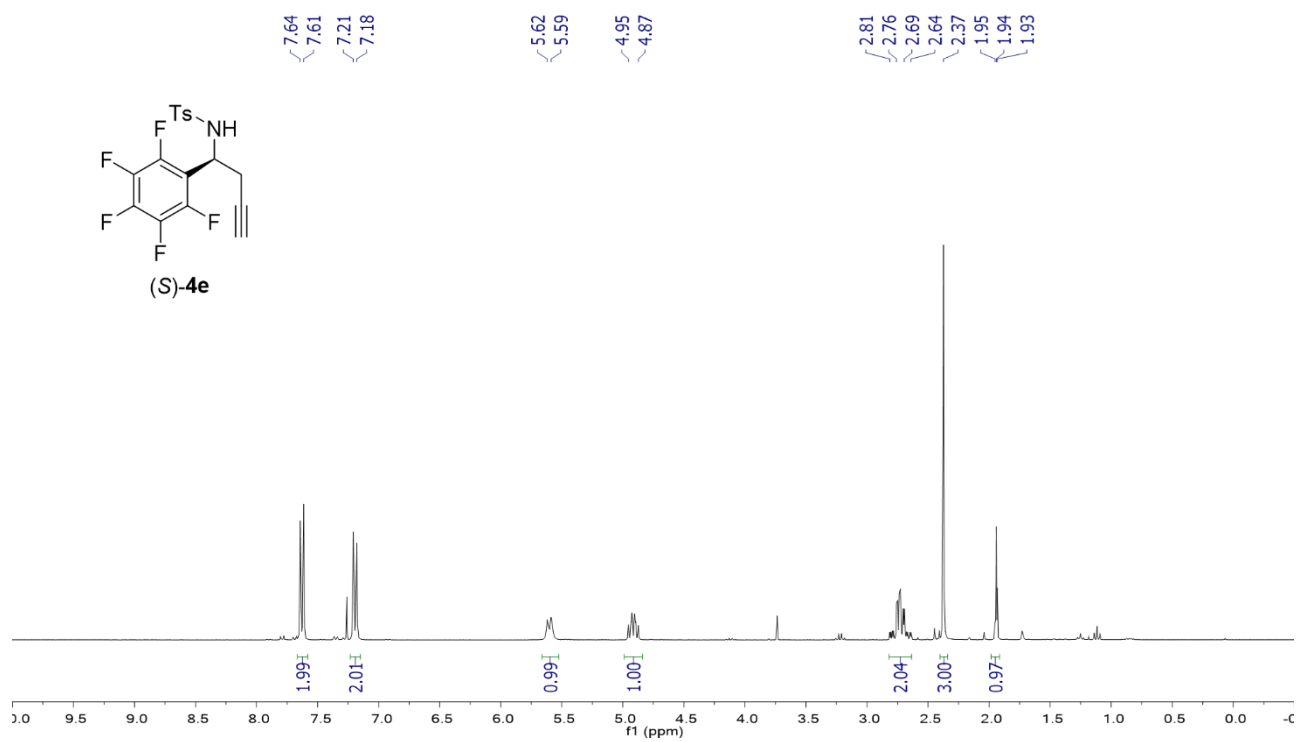

$^{19}\text{F}$  NMR spectrum of compound (*S*)-**4e** (282 MHz,  $\text{CDCl}_3$ )

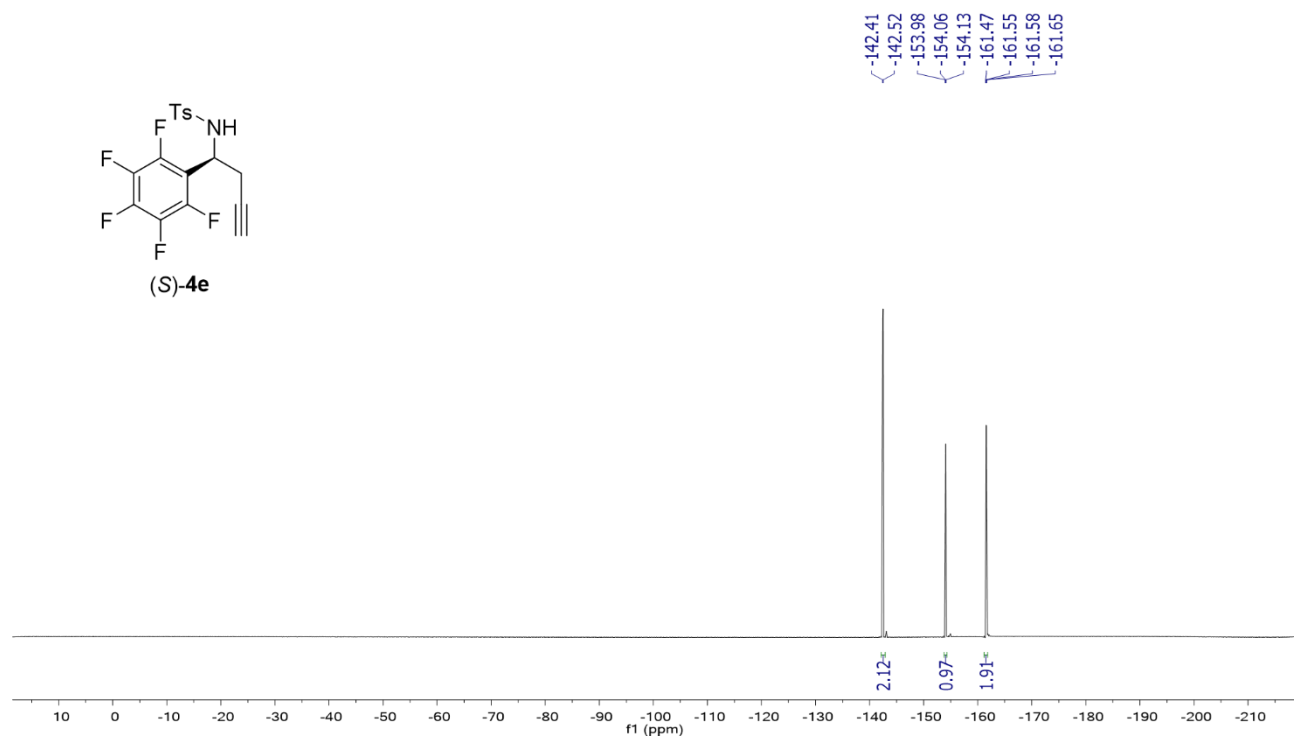

$^{13}\text{C}$  NMR spectrum of compound (*S*)-**4e** (75 MHz,  $\text{CDCl}_3$ )

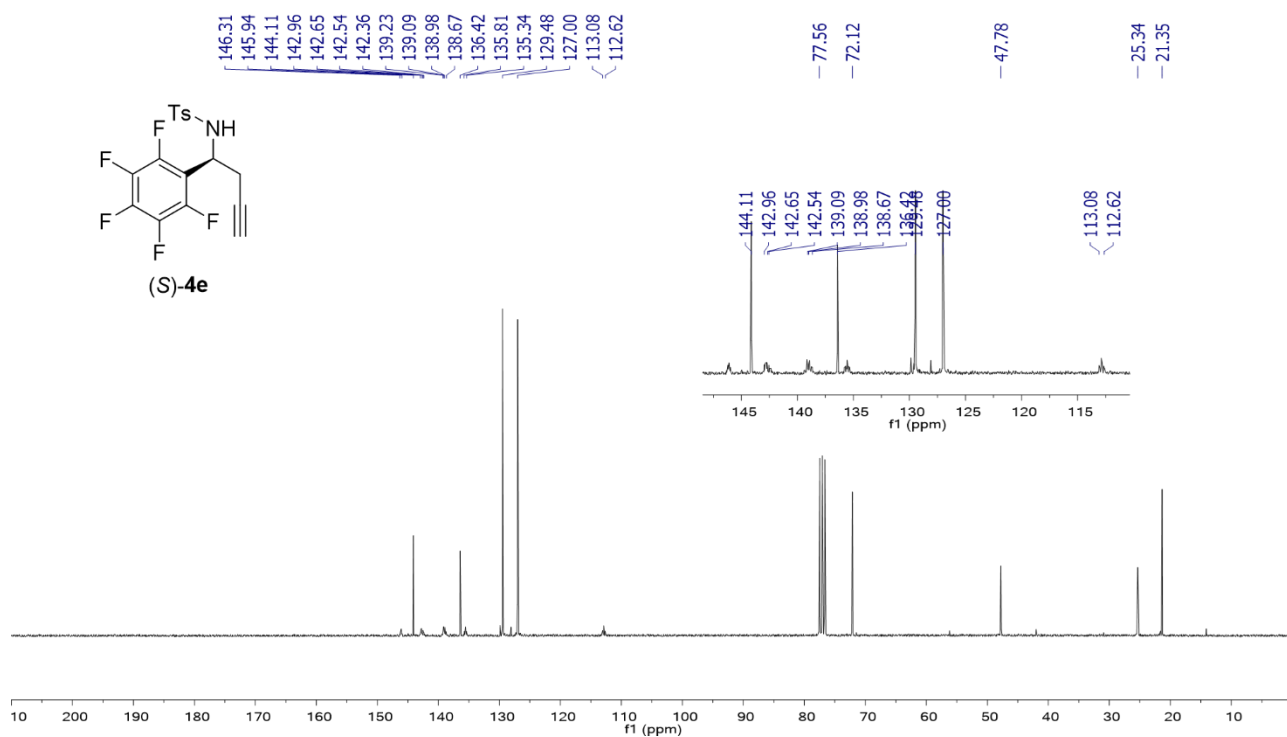

$^1\text{H}$  NMR spectrum of compound (*R*)-**4e** (300 MHz,  $\text{CDCl}_3$ )

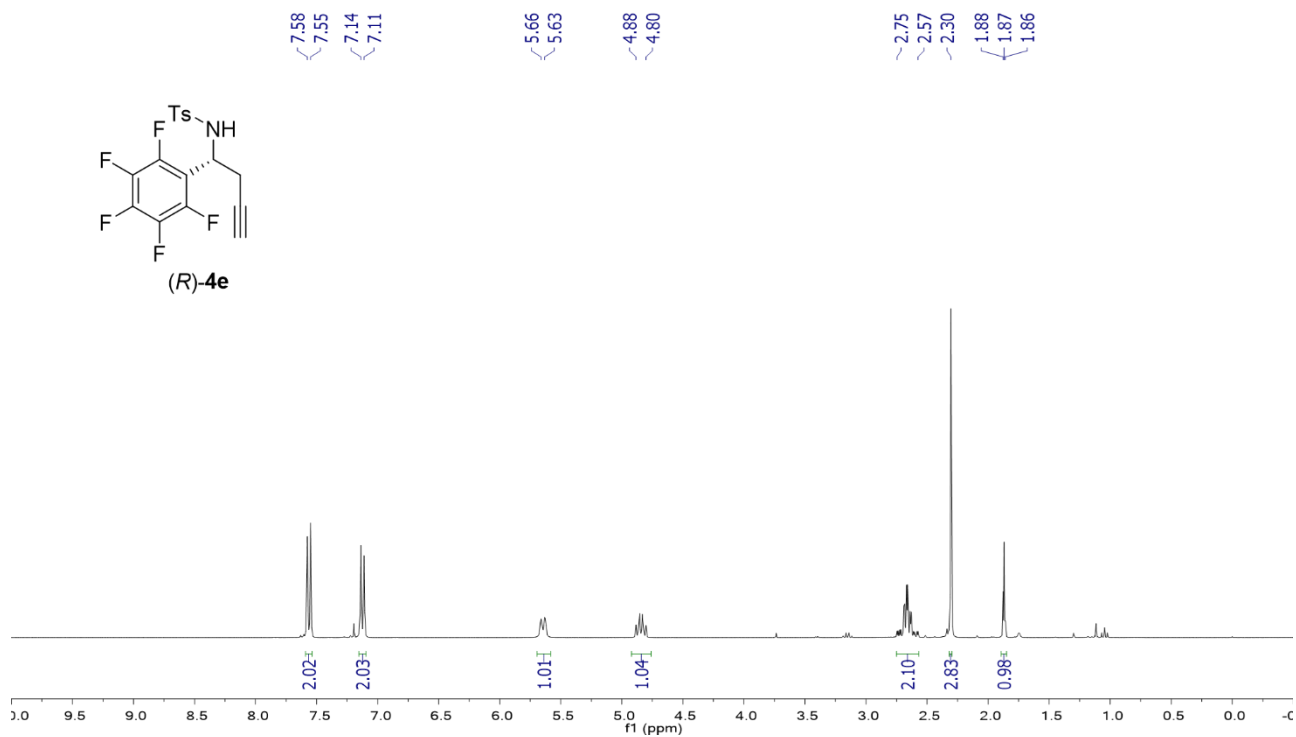

$^{19}\text{F}$  NMR spectrum of compound (*R*)-**4e** (282 MHz,  $\text{CDCl}_3$ )

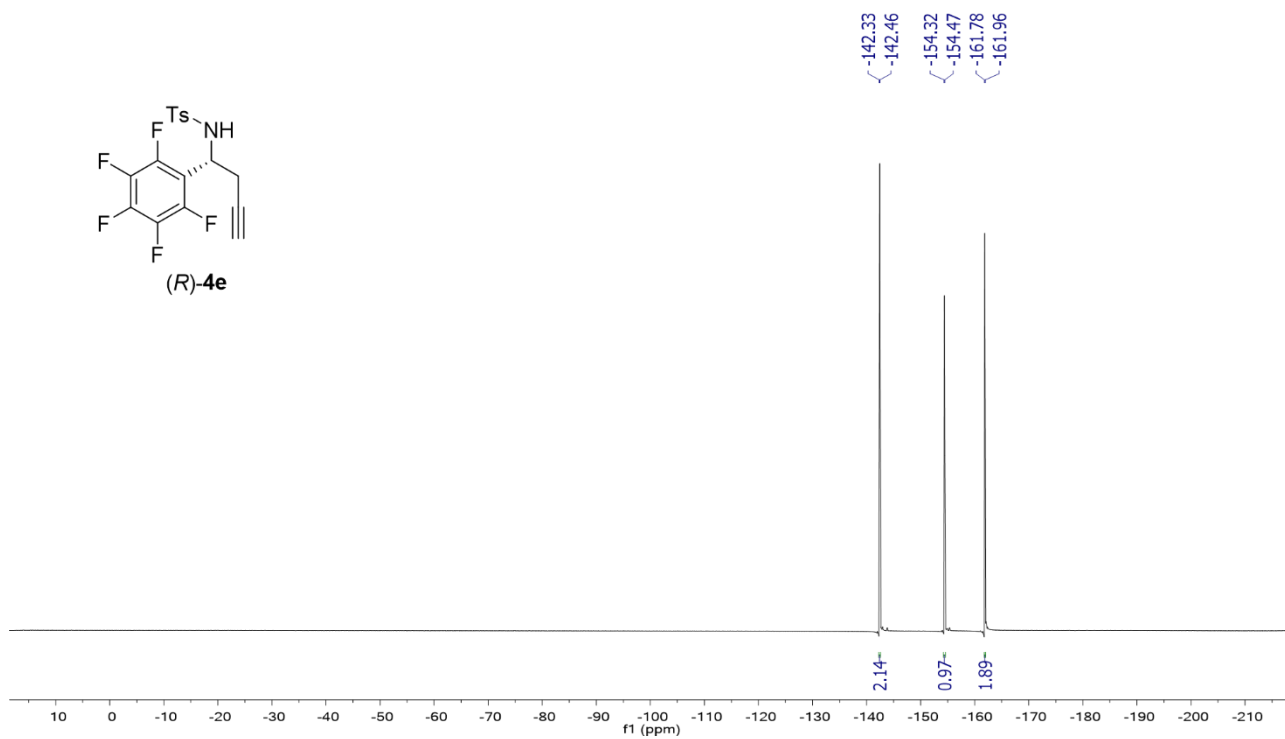

$^{13}\text{C}$  NMR spectrum of compound (*R*)-**4e** (75 MHz,  $\text{CDCl}_3$ )

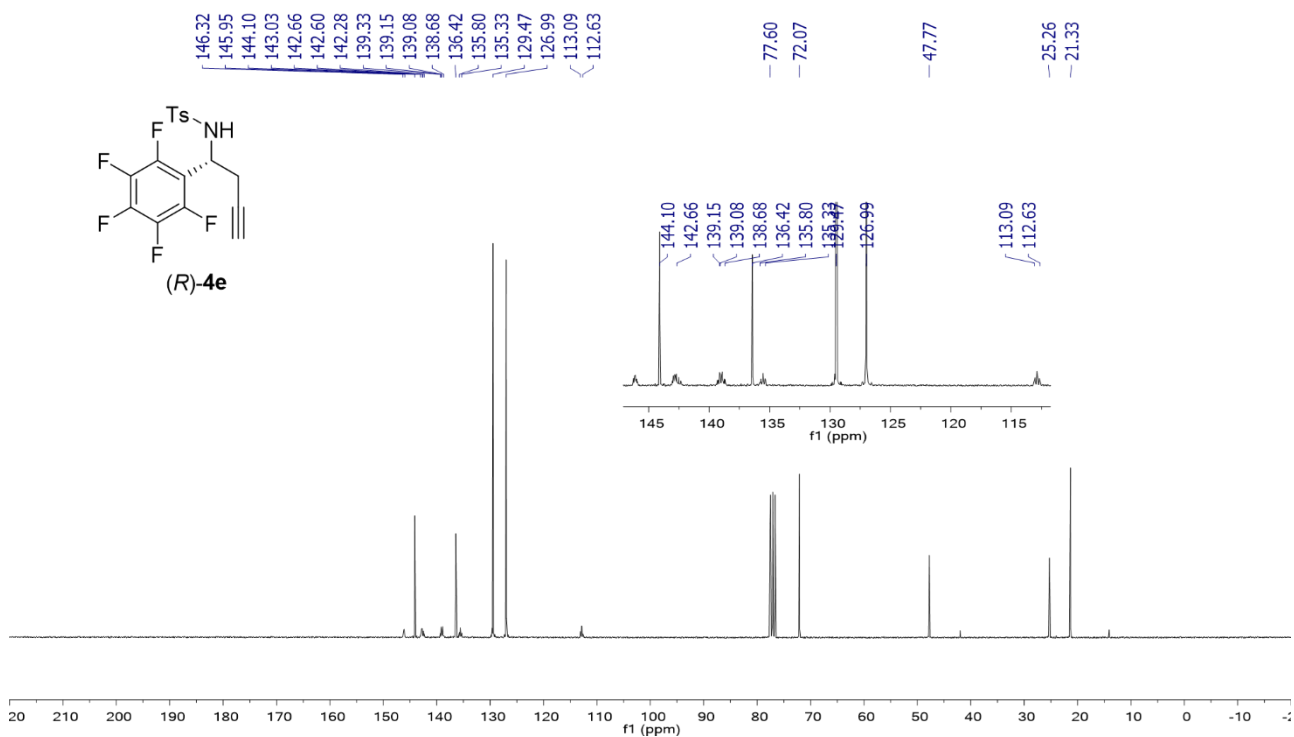

<sup>1</sup>H NMR spectrum of compound (S,S)-5 (300 MHz, CDCl<sub>3</sub>)

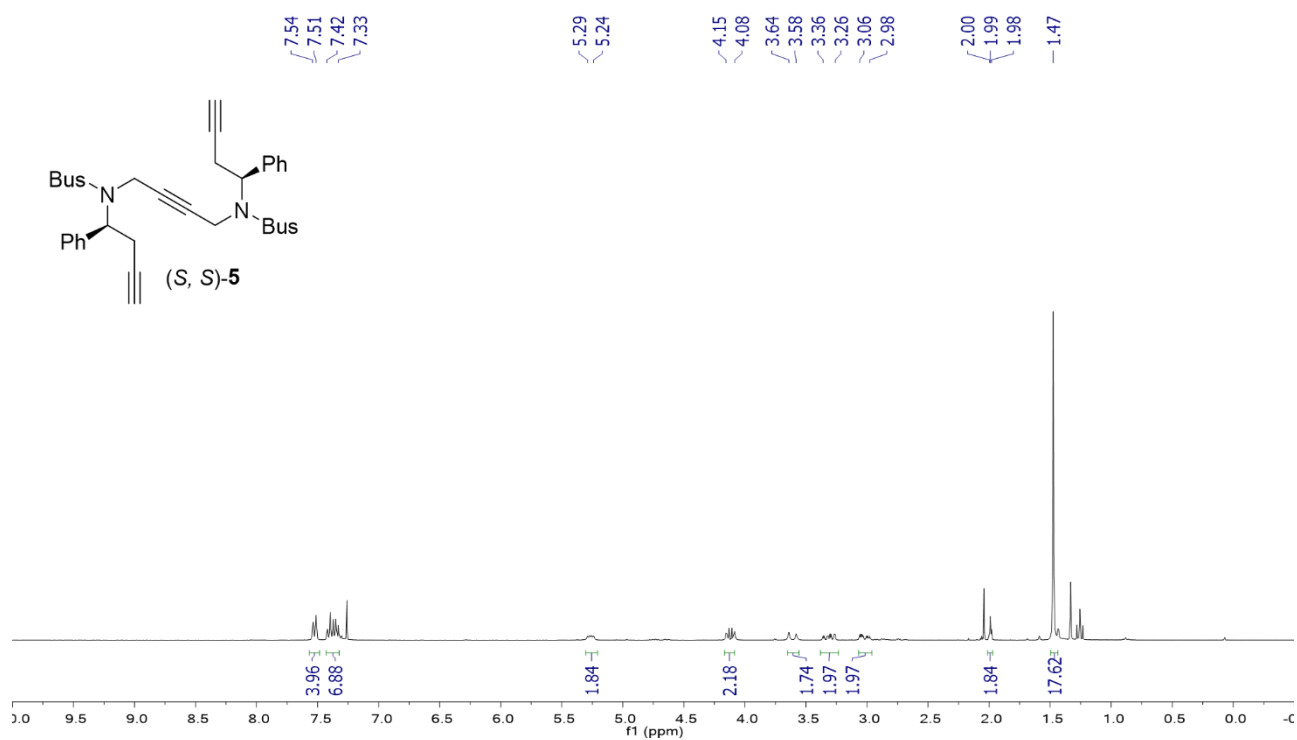

<sup>13</sup>C NMR spectrum of compound (S,S)-5 (75 MHz, CDCl<sub>3</sub>)

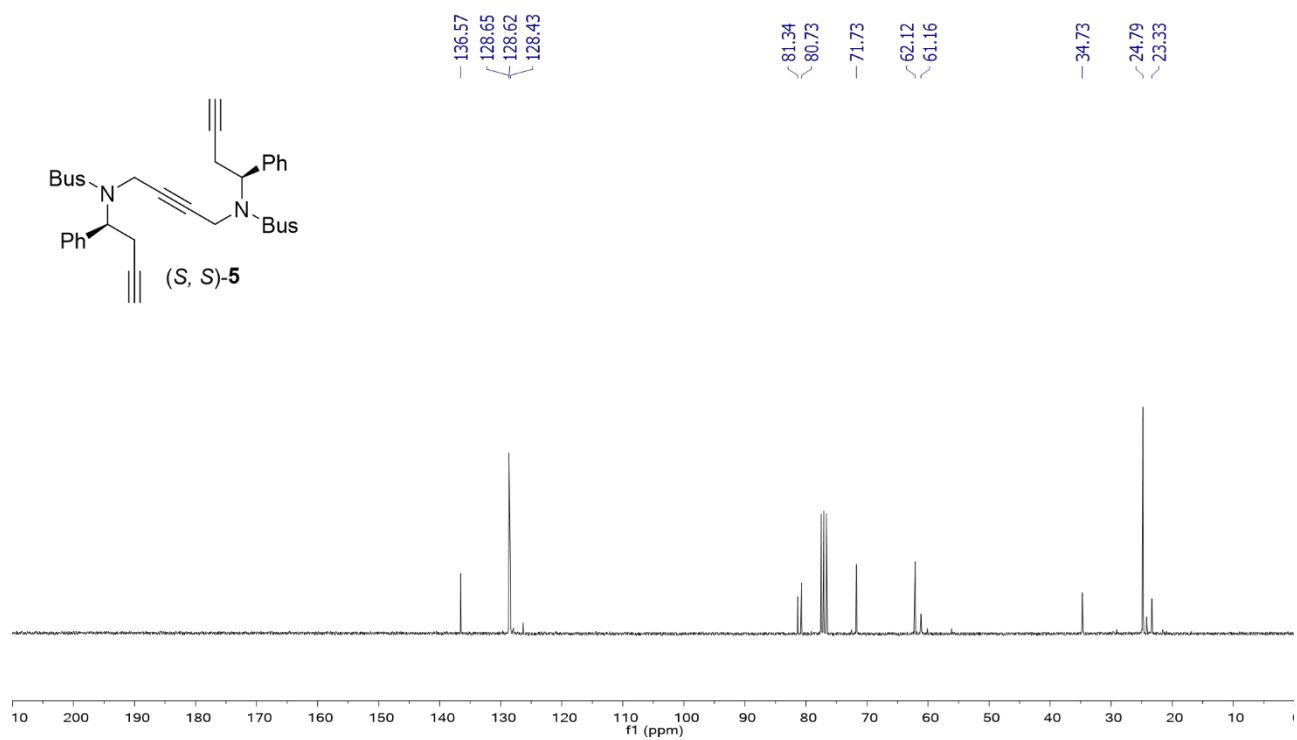

<sup>1</sup>H NMR spectrum of compound (S,S)-6a (300 MHz, CDCl<sub>3</sub>)

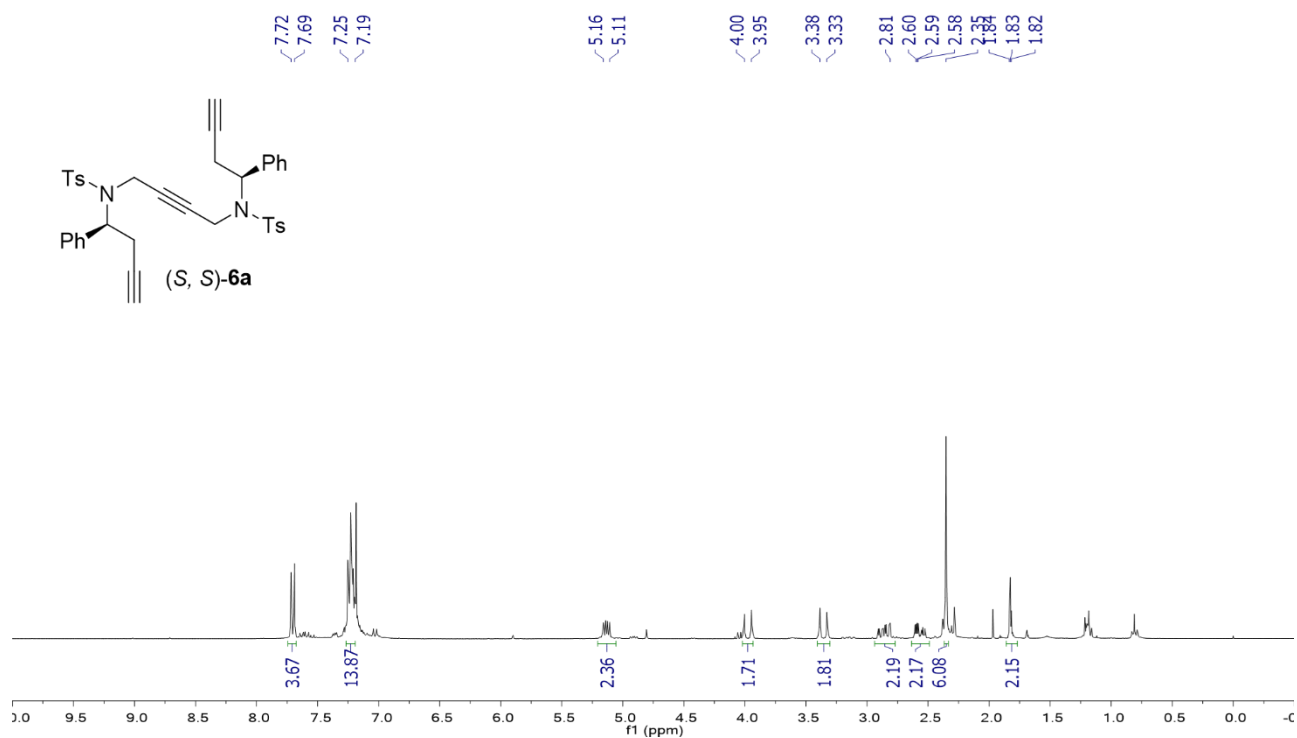

<sup>13</sup>C NMR spectrum of compound (S,S)-6a (75 MHz, CDCl<sub>3</sub>)

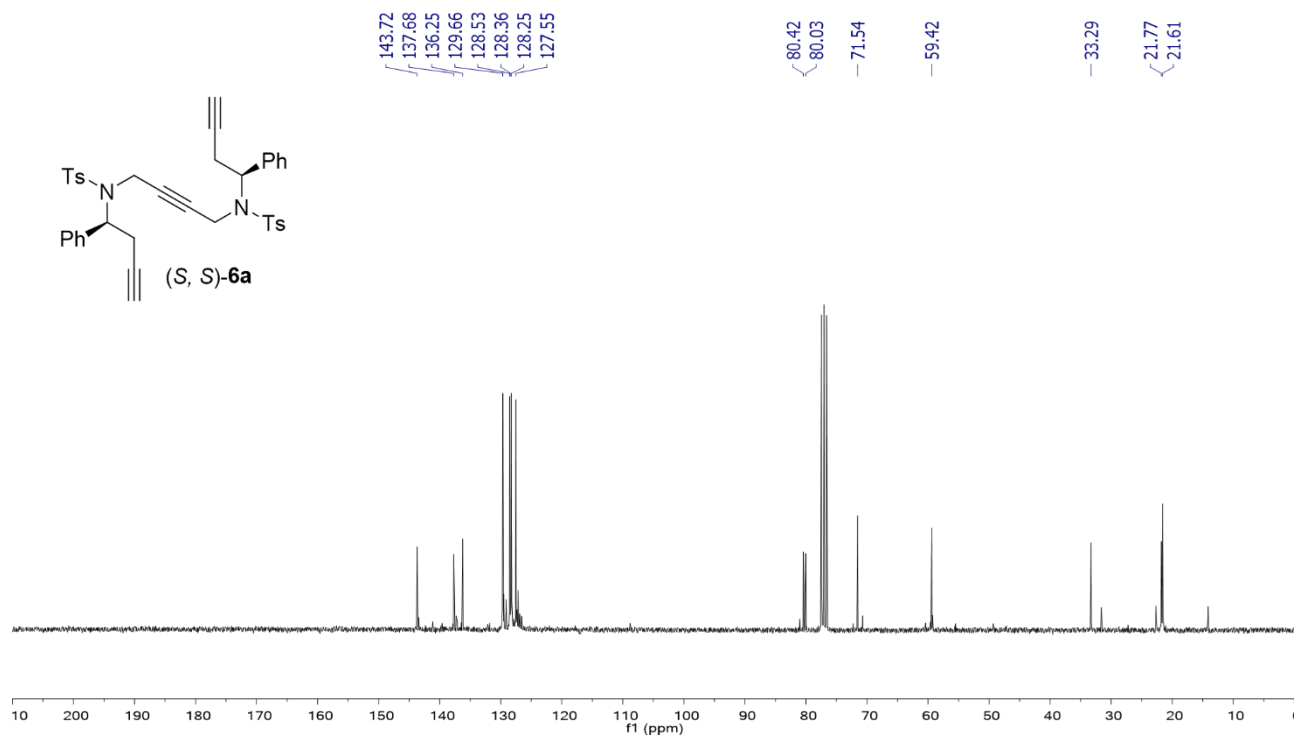

$^1\text{H}$  NMR spectrum of compound (*S,S*)-**6b** (300 MHz,  $\text{CDCl}_3$ )

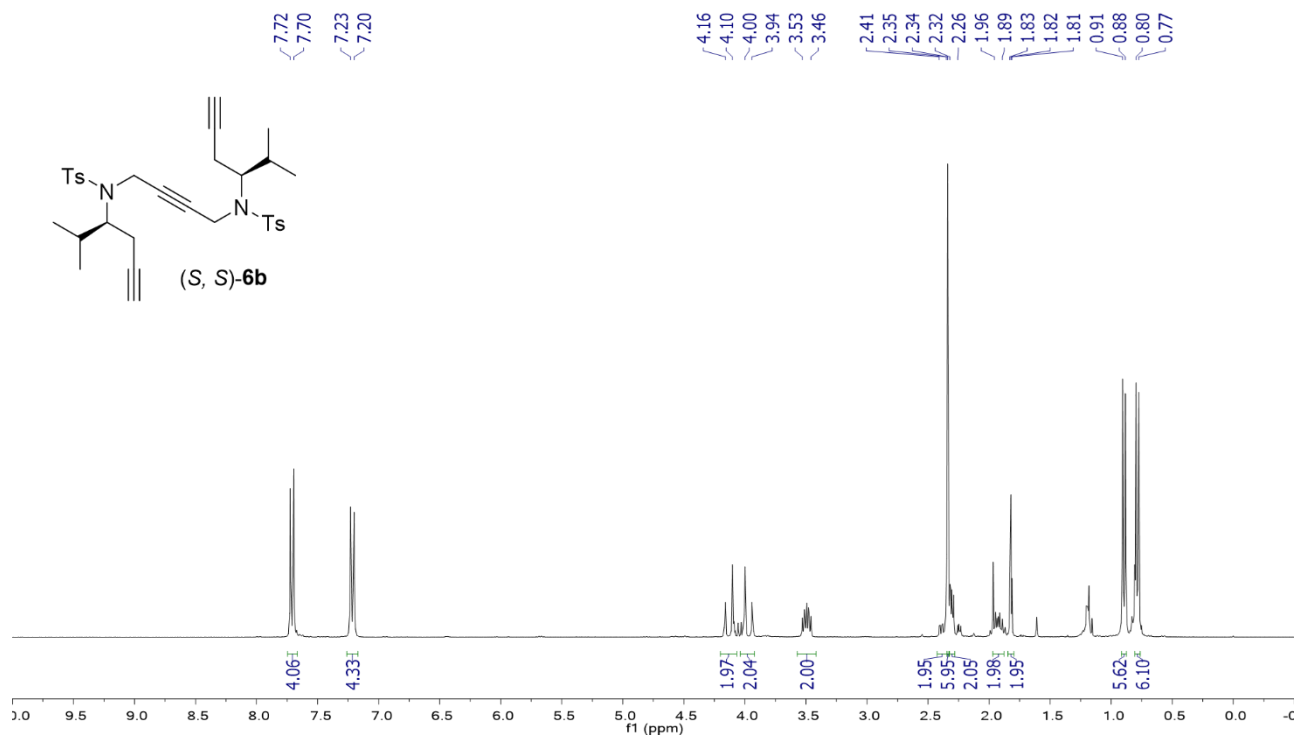

$^{13}\text{C}$  NMR spectrum of compound (*S,S*)-**6b** (75 MHz,  $\text{CDCl}_3$ )

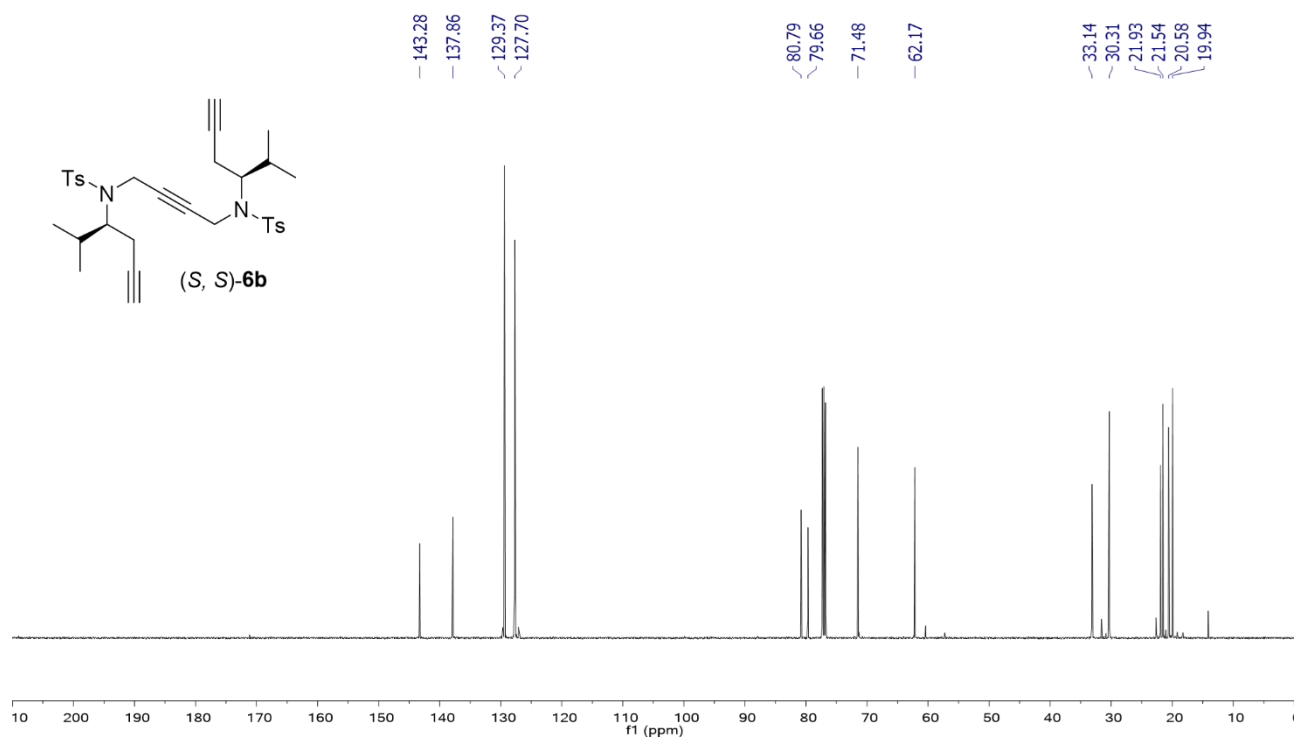

<sup>1</sup>H NMR spectrum of compound (S,S)-6c (300 MHz, CDCl<sub>3</sub>)

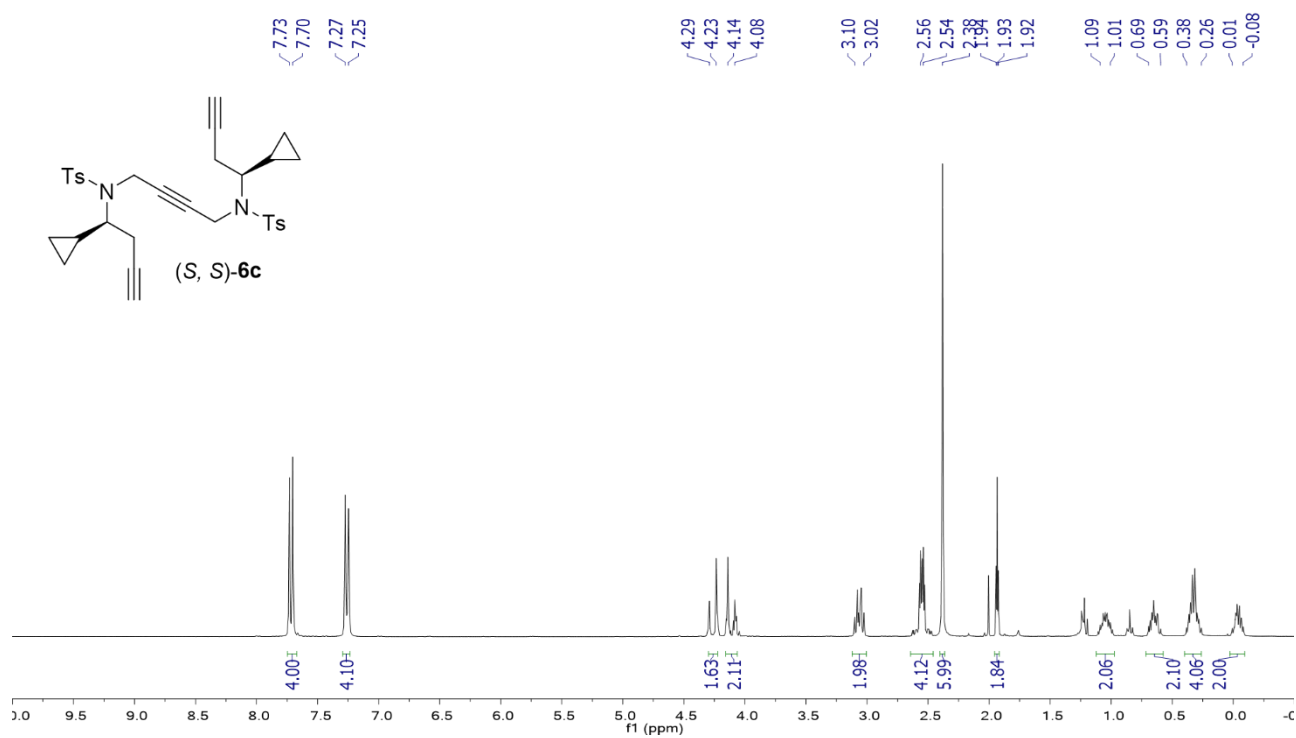

<sup>13</sup>C NMR spectrum of compound (S,S)-6c (75 MHz, CDCl<sub>3</sub>)

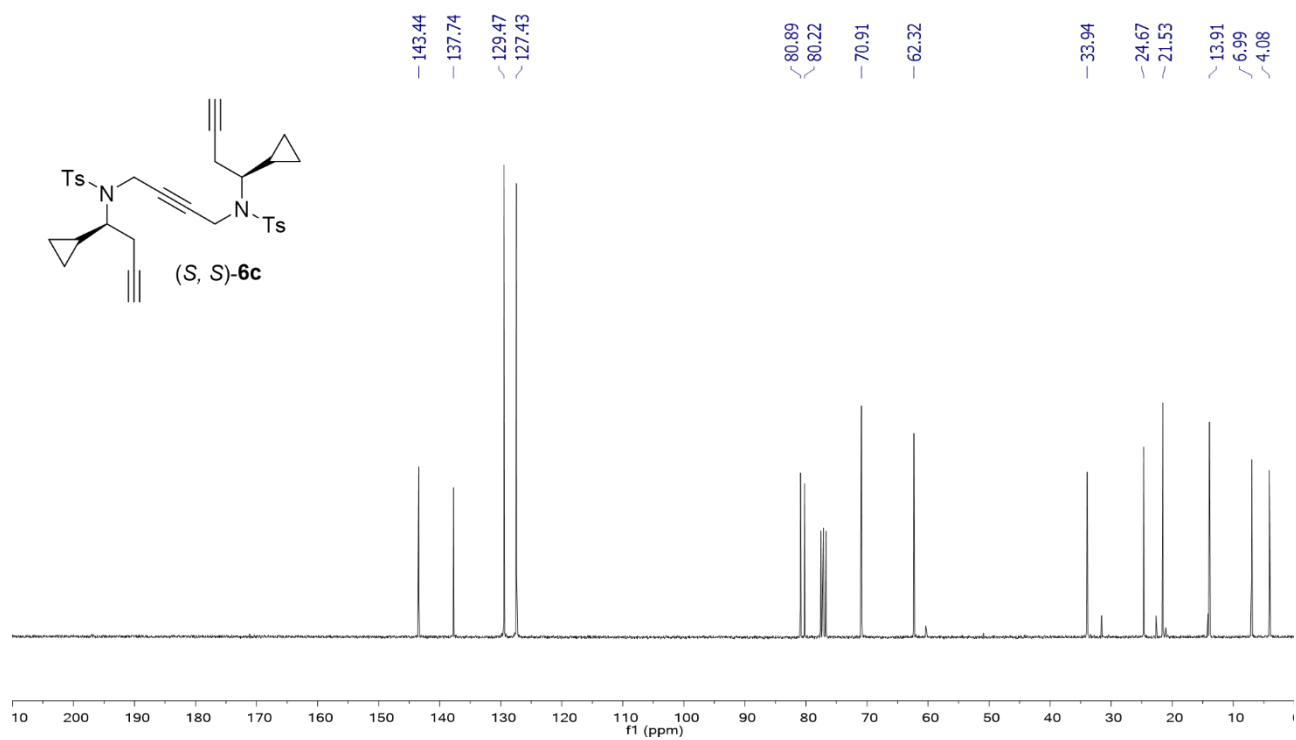



<sup>1</sup>H NMR spectrum of compound (S,S)-6d (300 MHz, CDCl<sub>3</sub>)

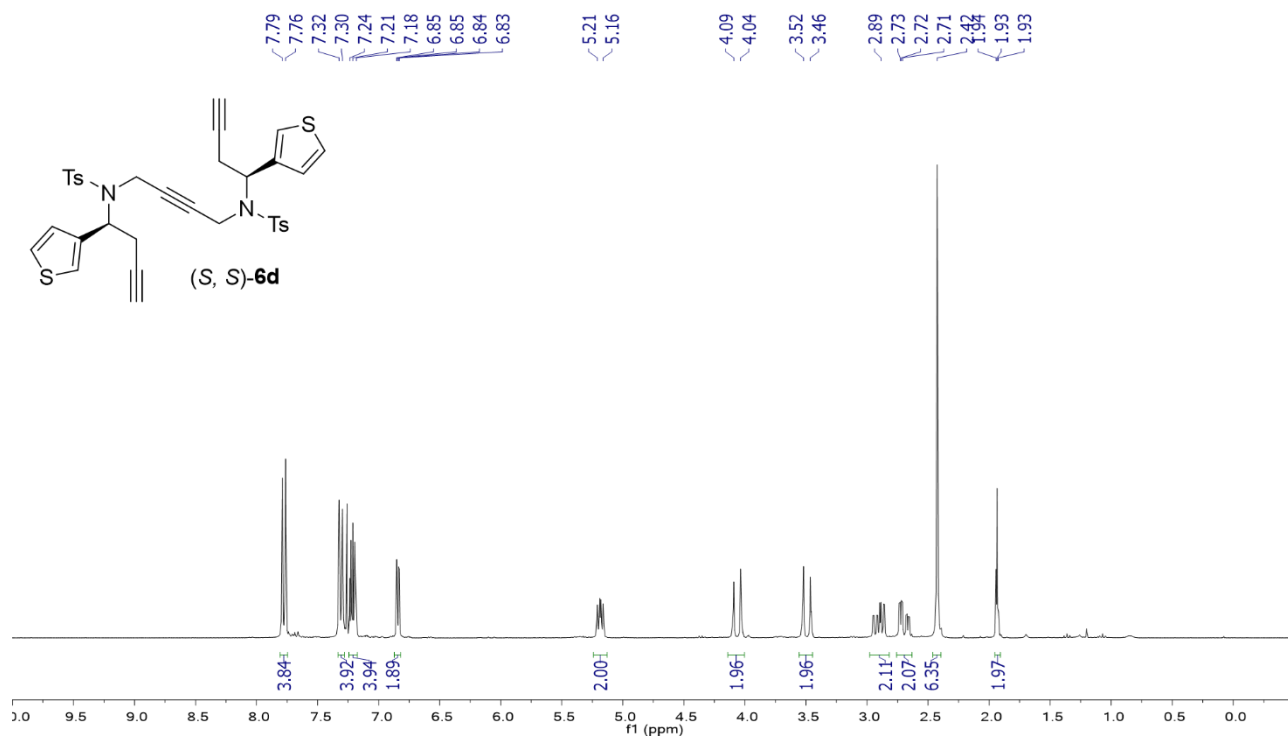

<sup>13</sup>C NMR spectrum of compound (S,S)-6d (75 MHz, CDCl<sub>3</sub>)

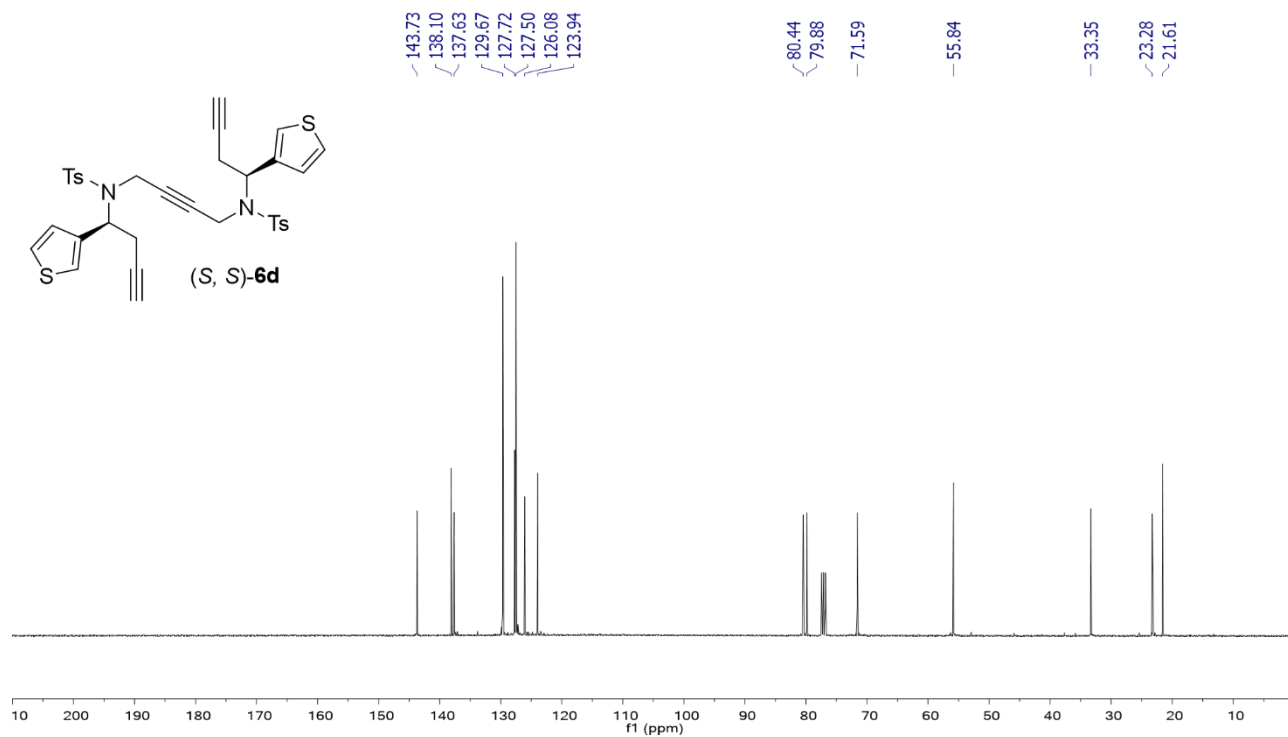

<sup>1</sup>H NMR spectrum of compound (S,S)-6e (300 MHz, CDCl<sub>3</sub>)

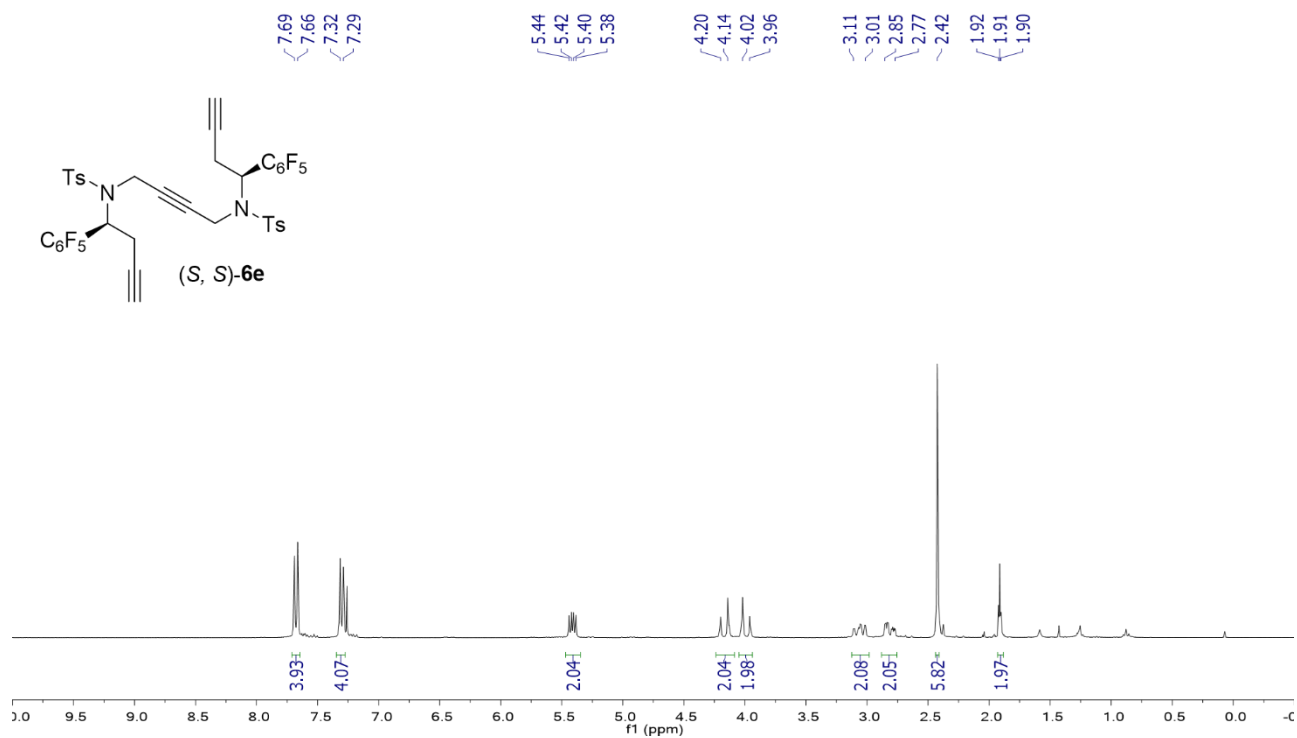

<sup>19</sup>F NMR spectrum of compound (S,S)-6e (282 MHz, CDCl<sub>3</sub>)

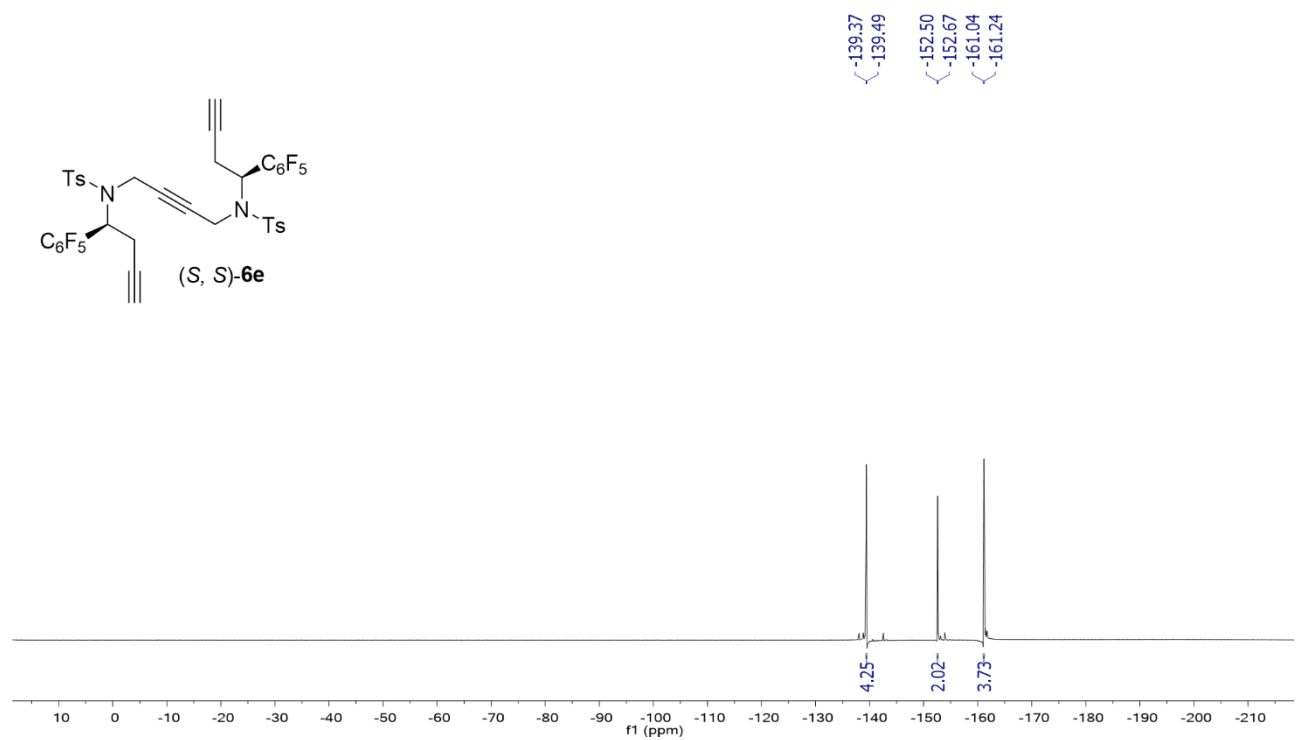

$^{13}\text{C}$  NMR spectrum of compound (*S,S*)-**6e** (75 MHz,  $\text{CDCl}_3$ )

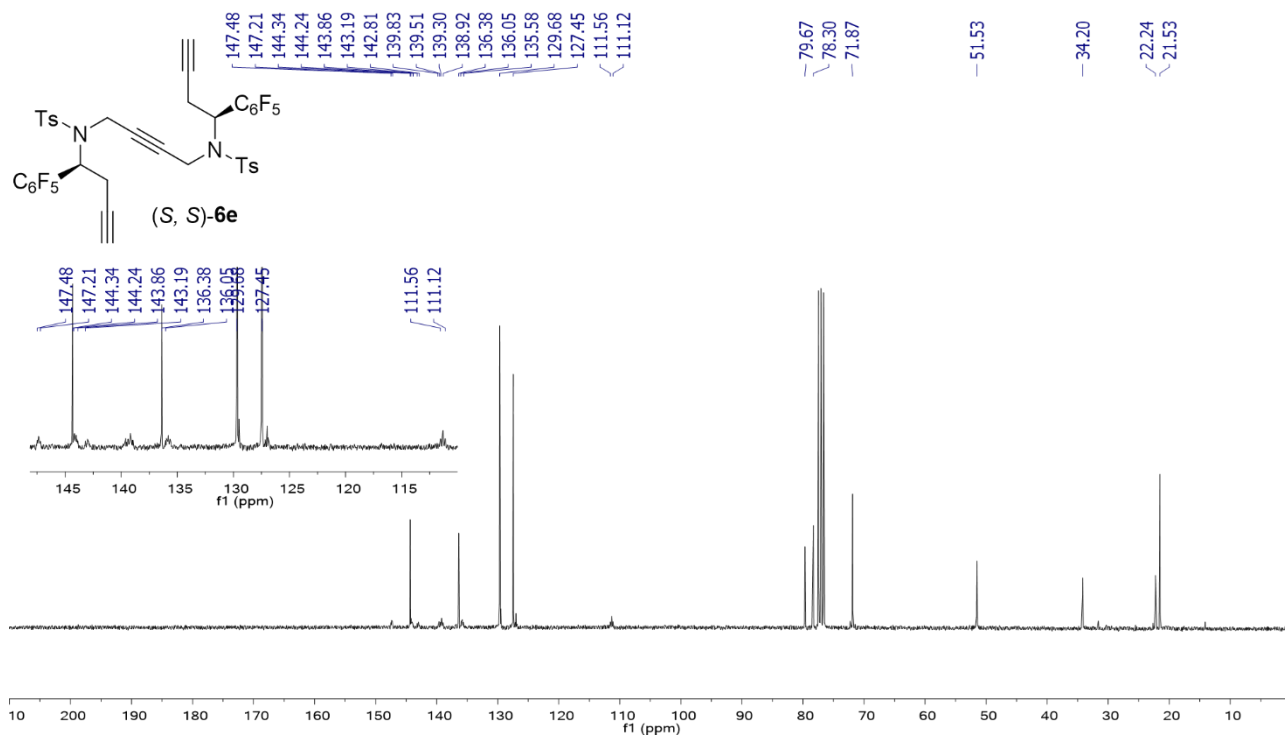

$^1\text{H}$  NMR spectrum of compound (*R,R*)-**6e** (300 MHz,  $\text{CDCl}_3$ )

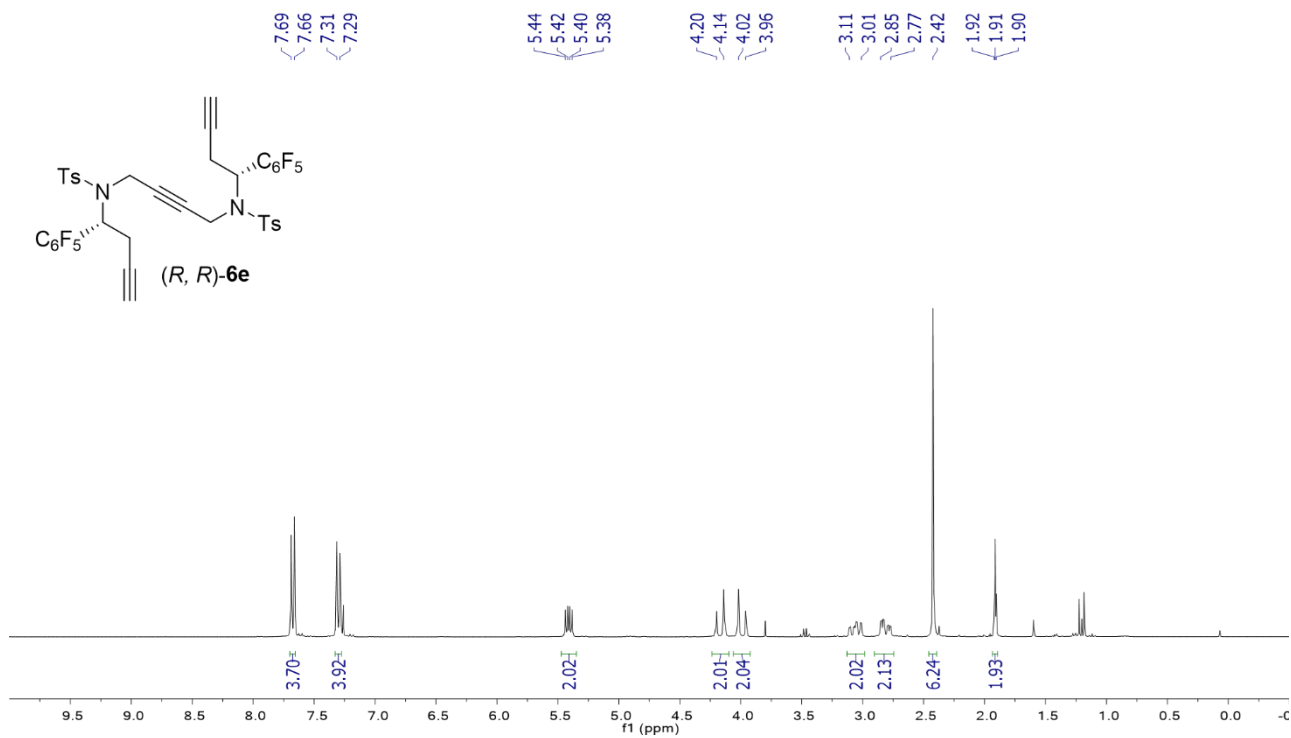

$^{19}\text{F}$  NMR spectrum of compound (*R,R*)-**6e** (282 MHz,  $\text{CDCl}_3$ )

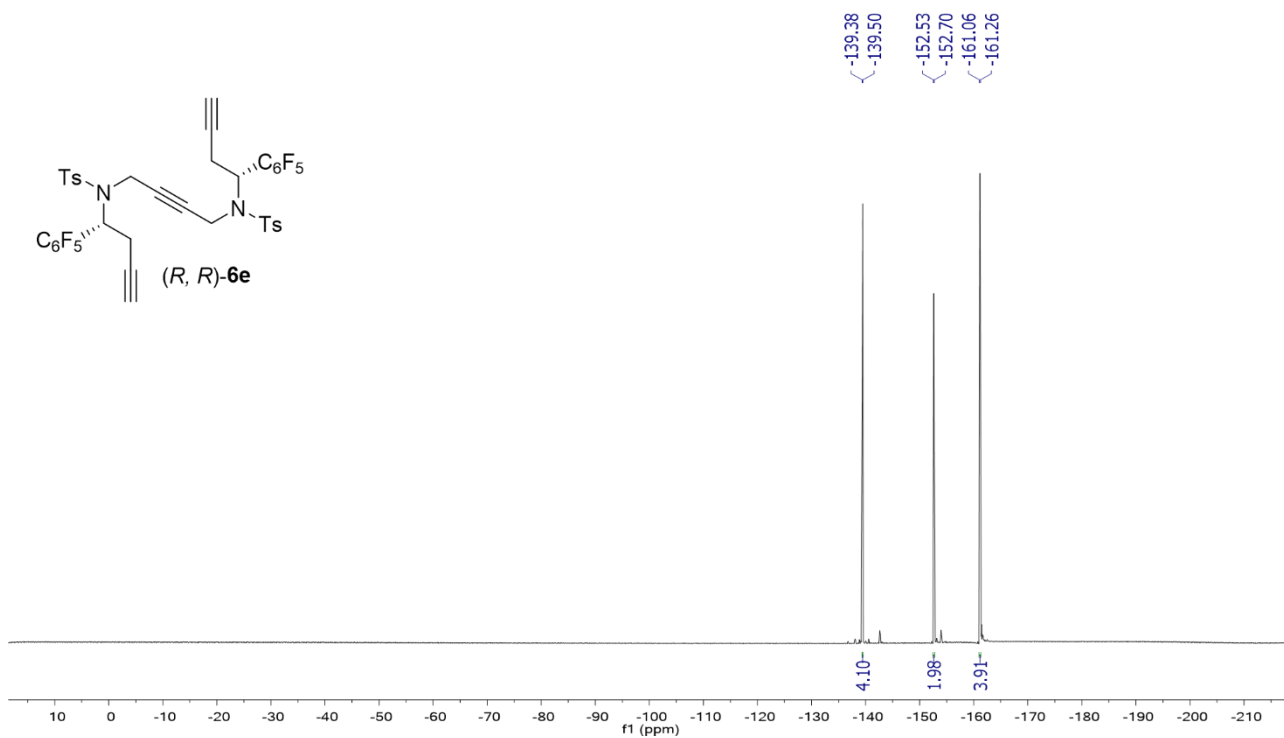

$^{13}\text{C}$  NMR spectrum of compound (*R,R*)-**6e** (75 MHz,  $\text{CDCl}_3$ )

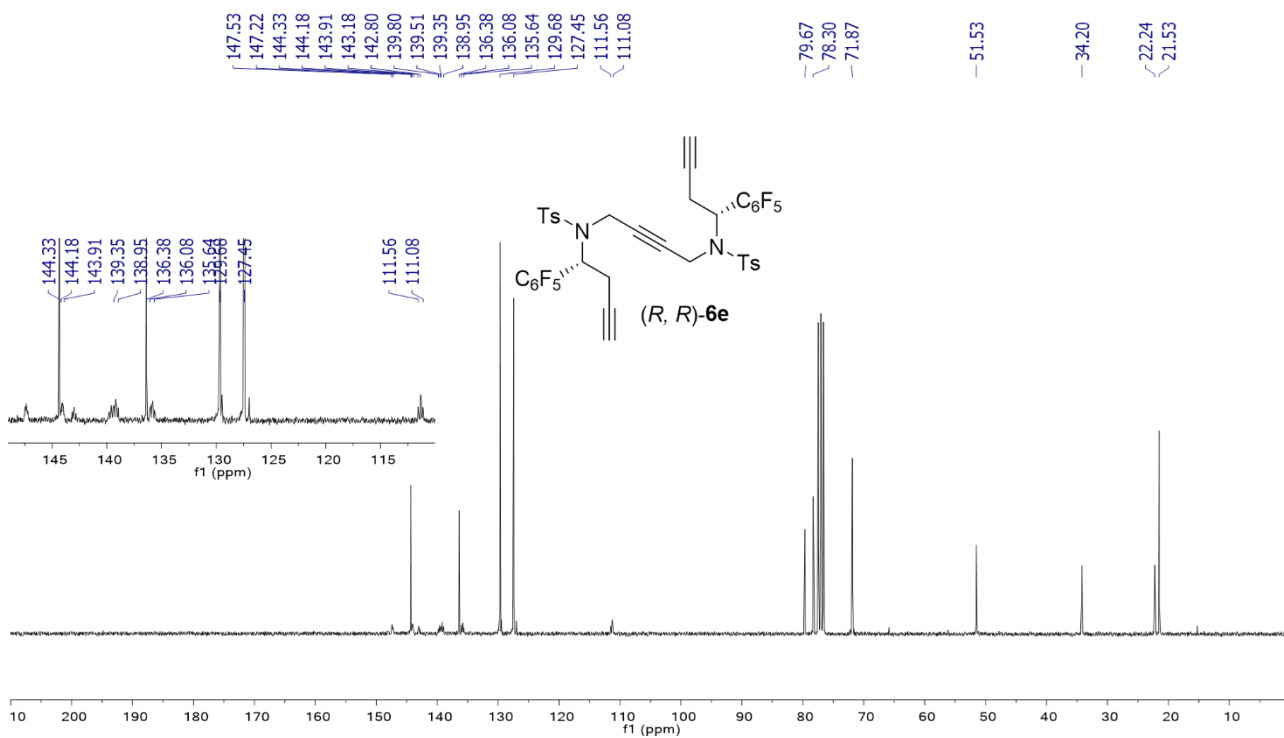

$^1\text{H}$  NMR spectrum of compound (*S,S*)-**7a** (300 MHz,  $\text{CDCl}_3$ )

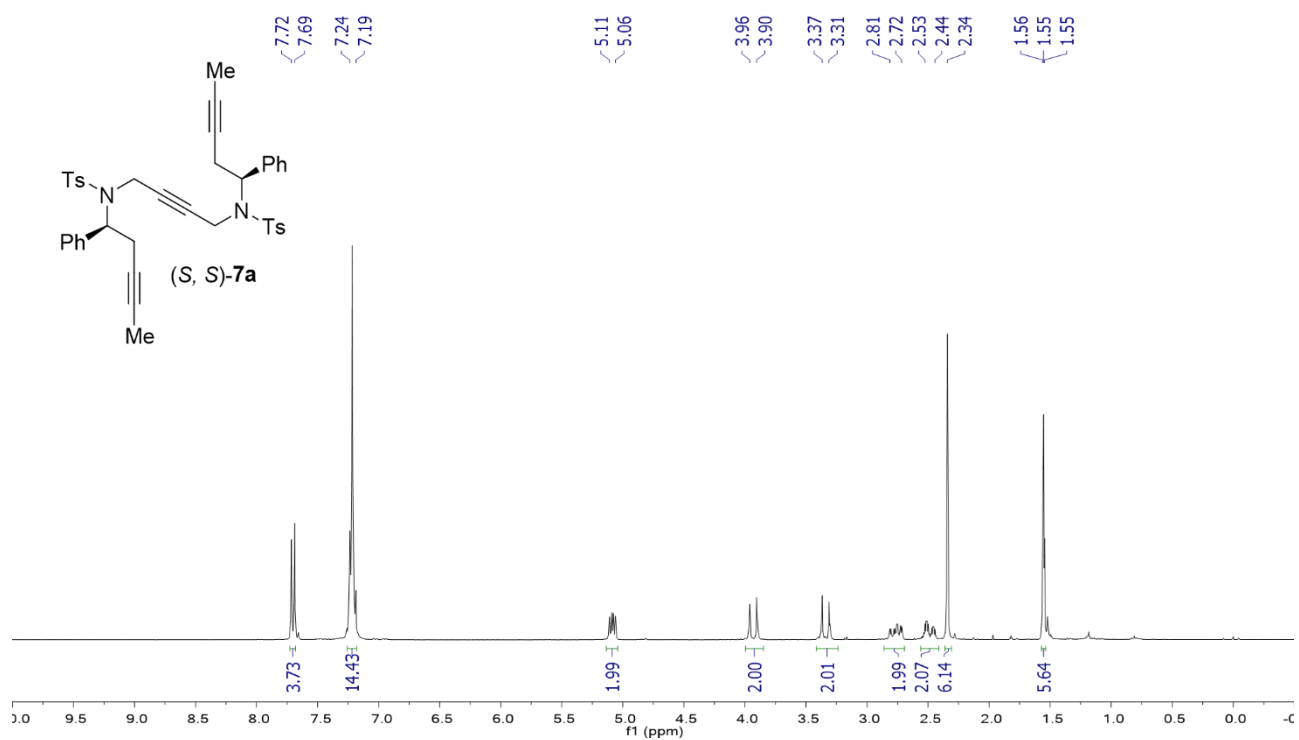

$^{13}\text{C}$  NMR spectrum of compound (*S,S*)-**7a** (75 MHz,  $\text{CDCl}_3$ )

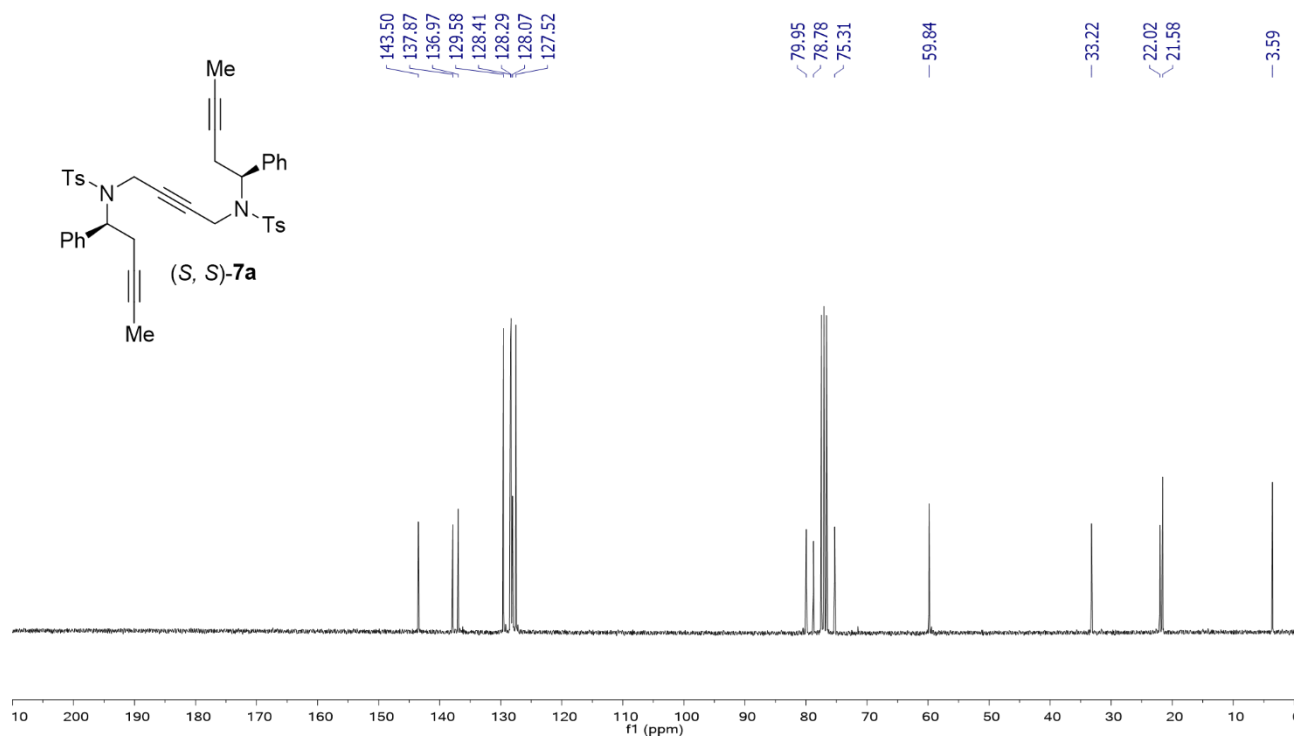

$^1\text{H}$  NMR spectrum of compound (*S,S*)-**7b** (300 MHz,  $\text{CDCl}_3$ )

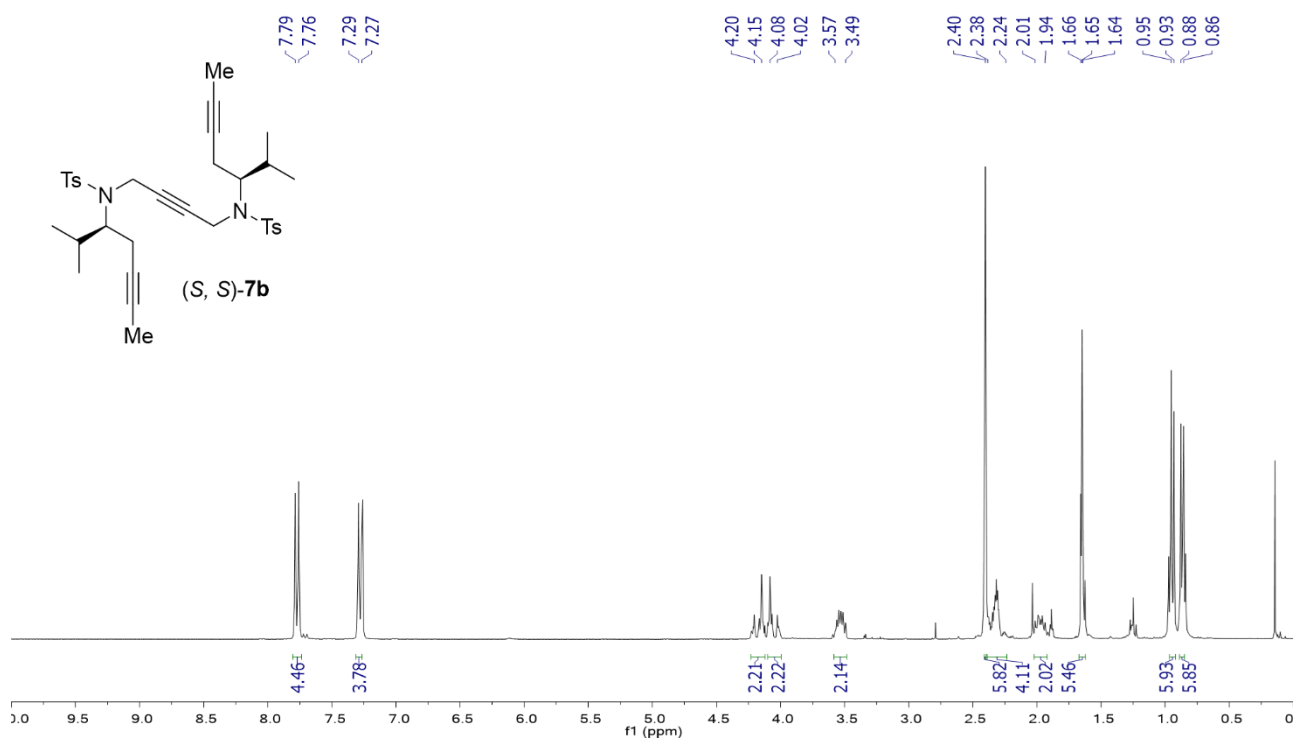

$^{13}\text{C}$  NMR spectrum of compound (*S,S*)-**7b** (75 MHz,  $\text{CDCl}_3$ )

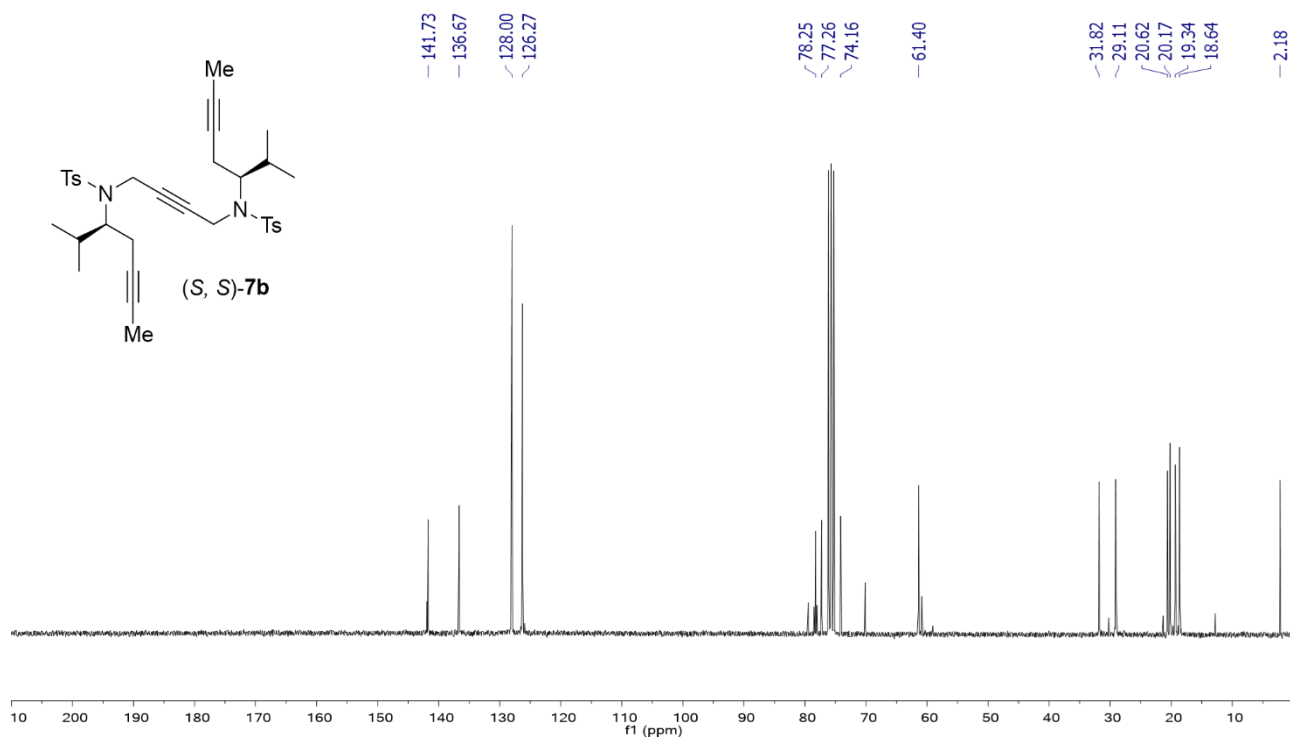

$^1\text{H}$  NMR spectrum of compound (*S,S*)-**7c** (300 MHz,  $\text{CDCl}_3$ )

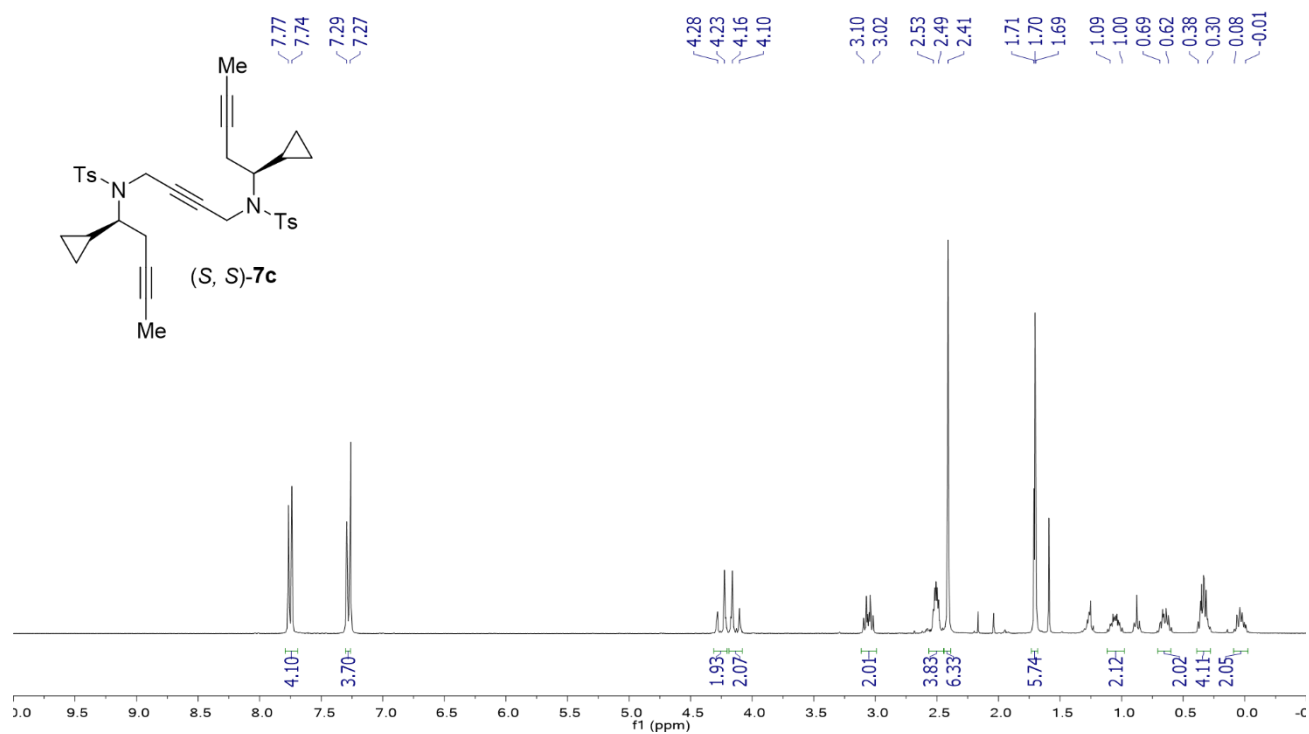

$^{13}\text{C}$  NMR spectrum of compound (*S,S*)-**7c** (75 MHz,  $\text{CDCl}_3$ )

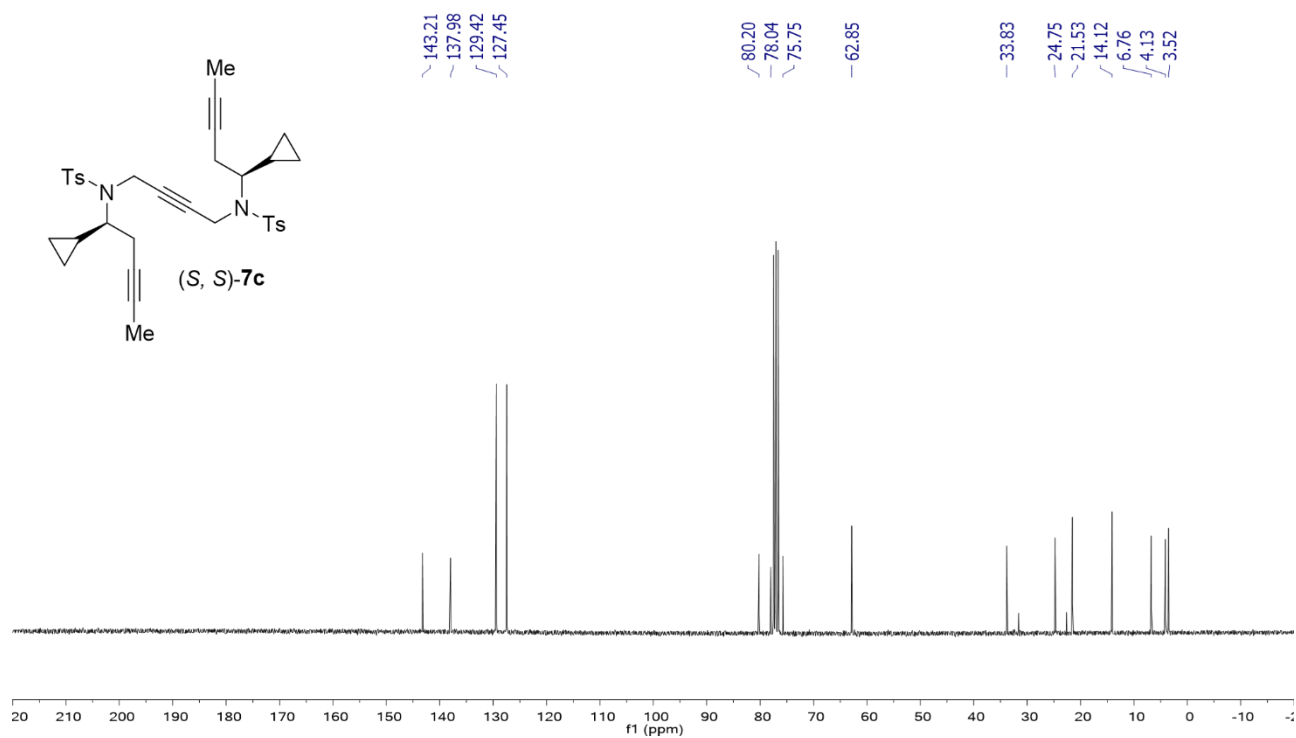

<sup>1</sup>H NMR spectrum of compound (S,S)-7d (300 MHz, CDCl<sub>3</sub>)

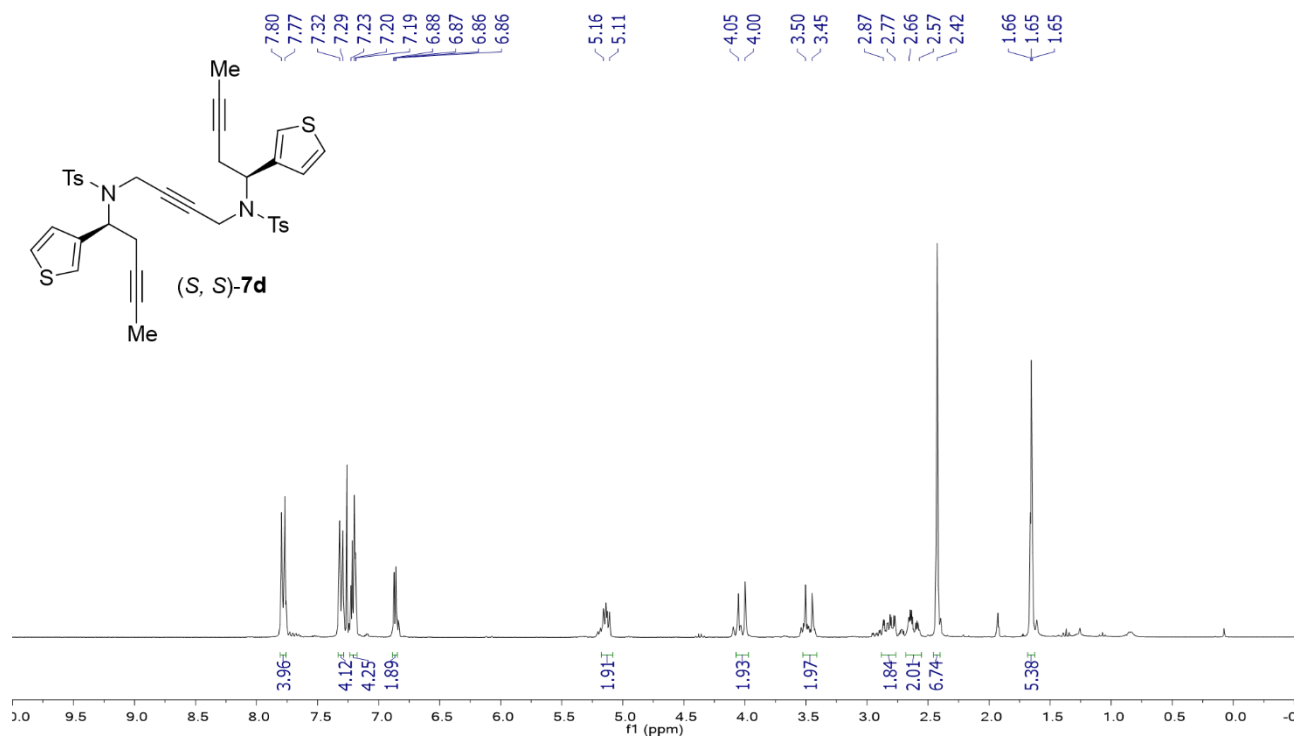

<sup>13</sup>C NMR spectrum of compound (S,S)-7d (75 MHz, CDCl<sub>3</sub>)

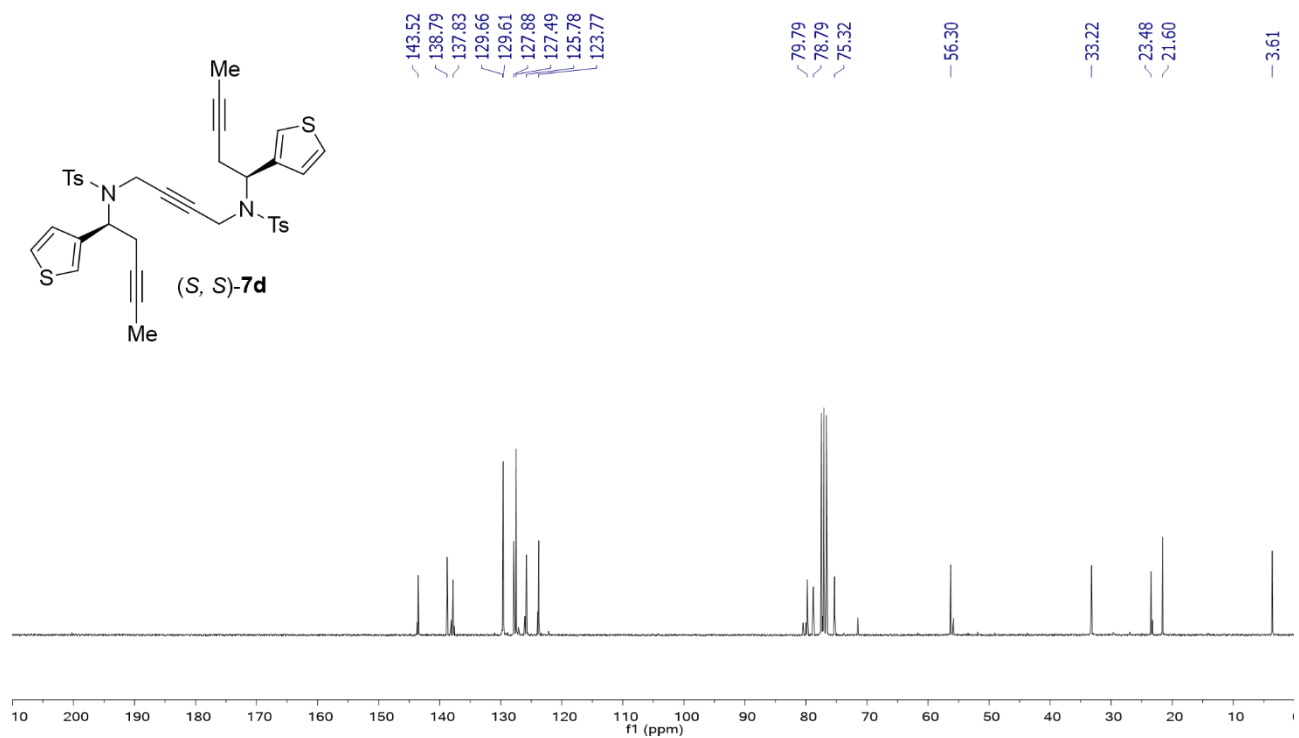



$^1\text{H}$  NMR spectrum of compound (*S,S*)-**7e** (300 MHz,  $\text{CDCl}_3$ )

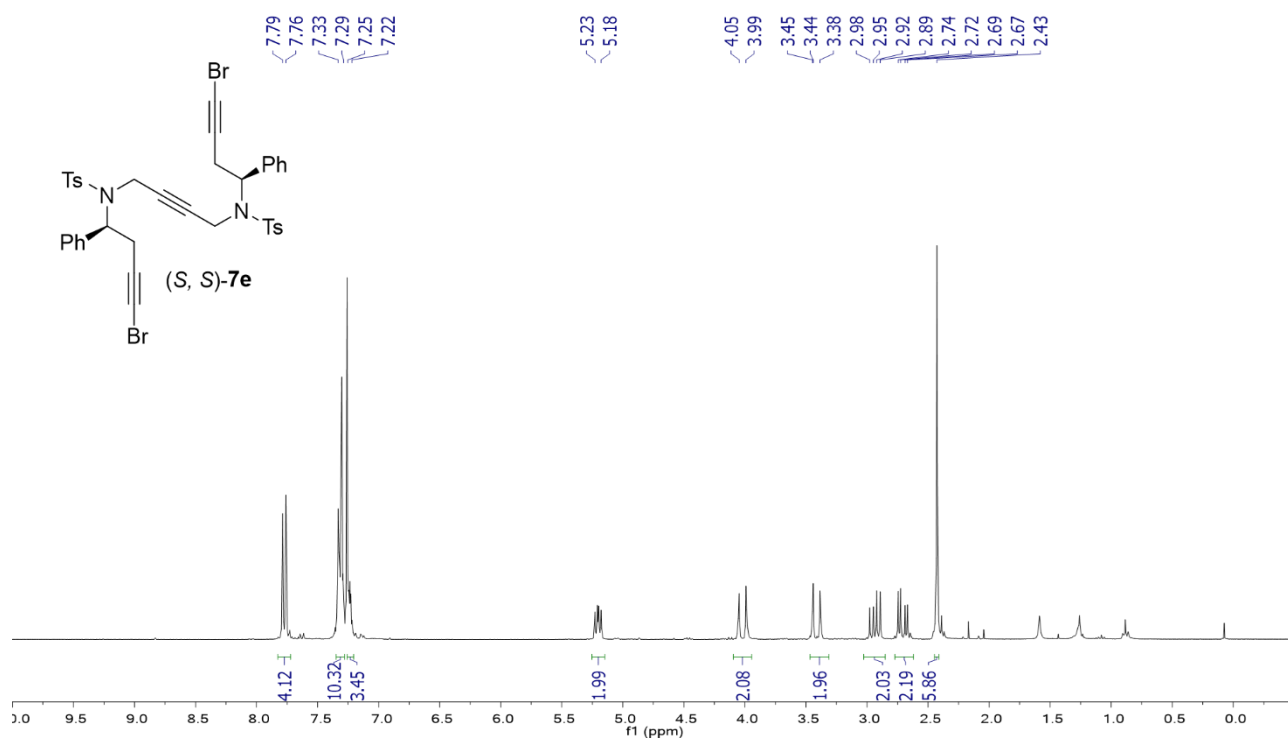

$^{13}\text{C}$  NMR spectrum of compound (*S,S*)-**7e** (75 MHz,  $\text{CDCl}_3$ )

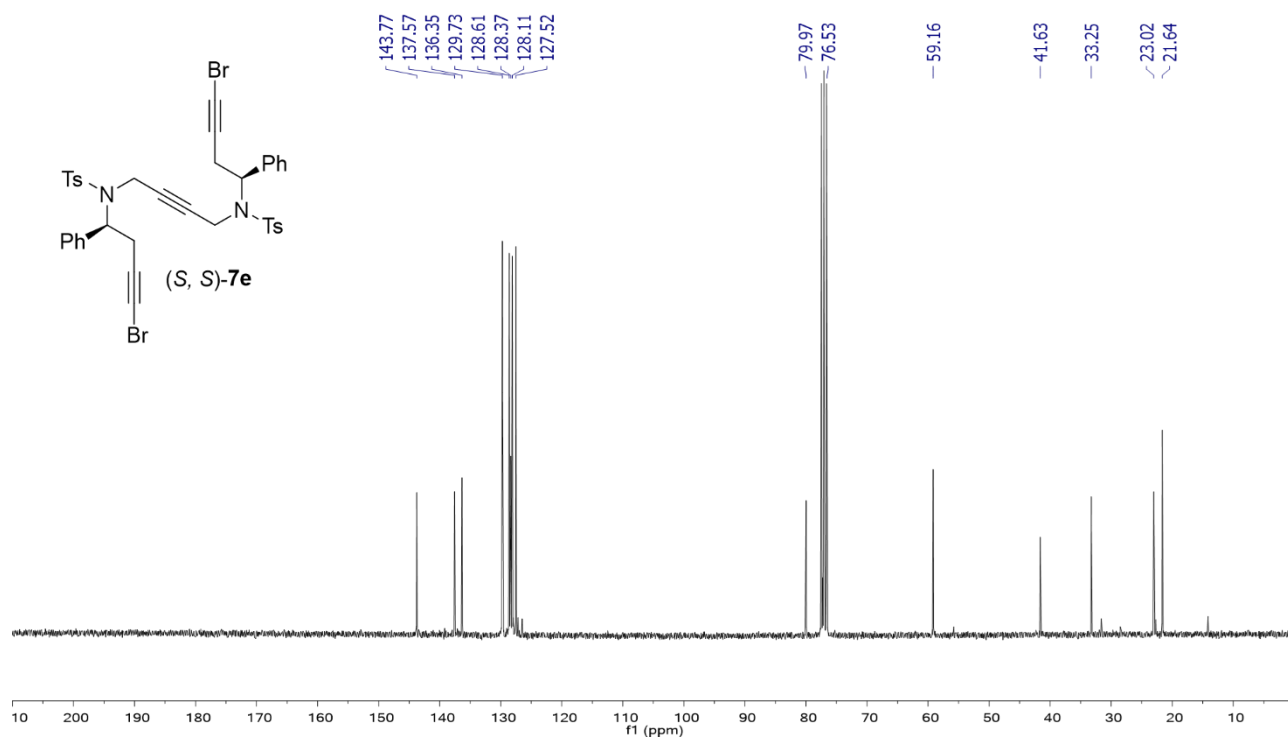

$^1\text{H}$  NMR spectrum of compound (*S,S*)-**7f** (300 MHz,  $\text{CDCl}_3$ )

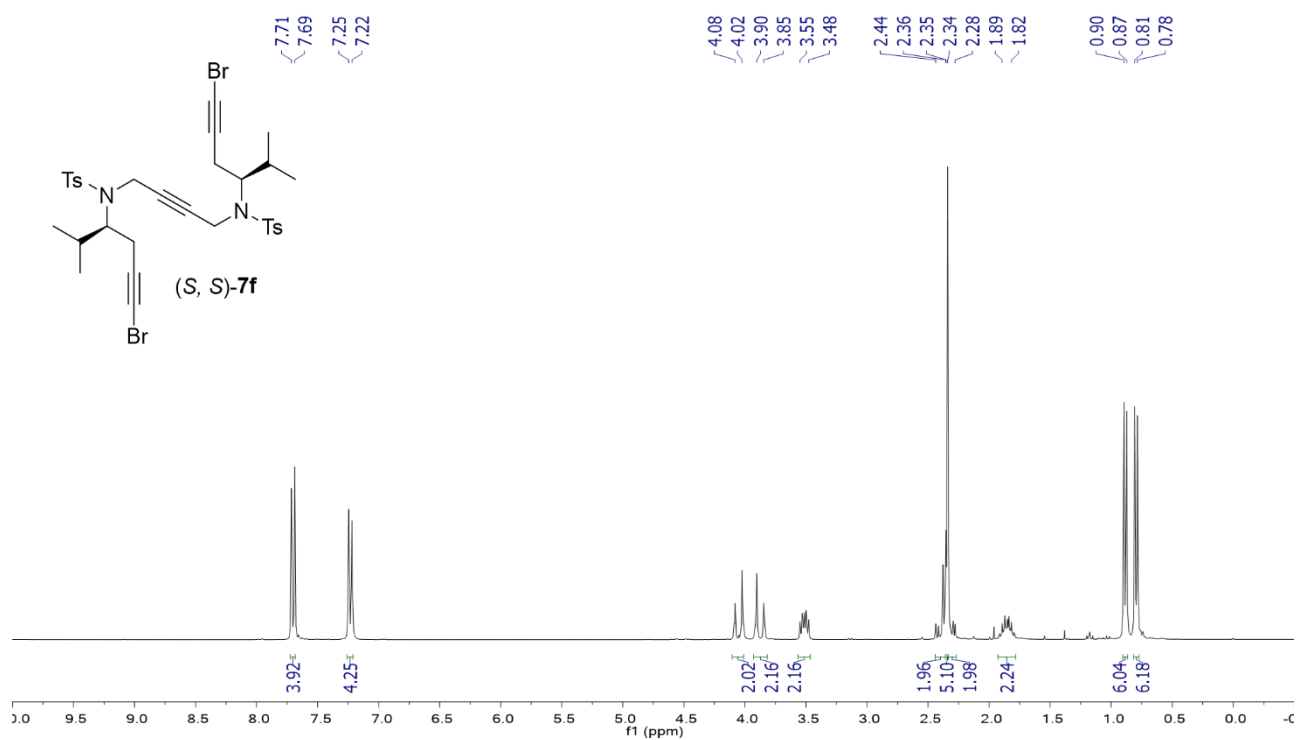

$^{13}\text{C}$  NMR spectrum of compound (*S,S*)-**7f** (75 MHz,  $\text{CDCl}_3$ )

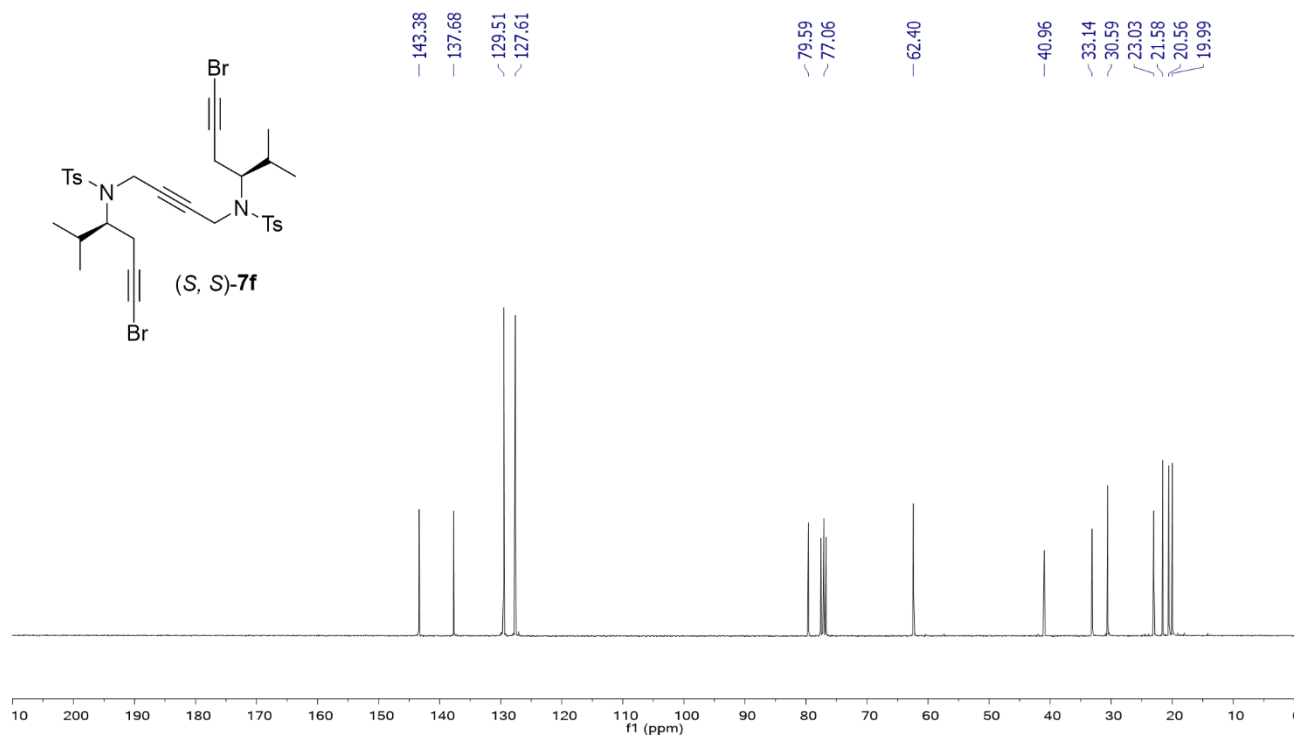

$^1\text{H}$  NMR spectrum of compound (*S,S*)-**7g** (300 MHz,  $\text{CDCl}_3$ )

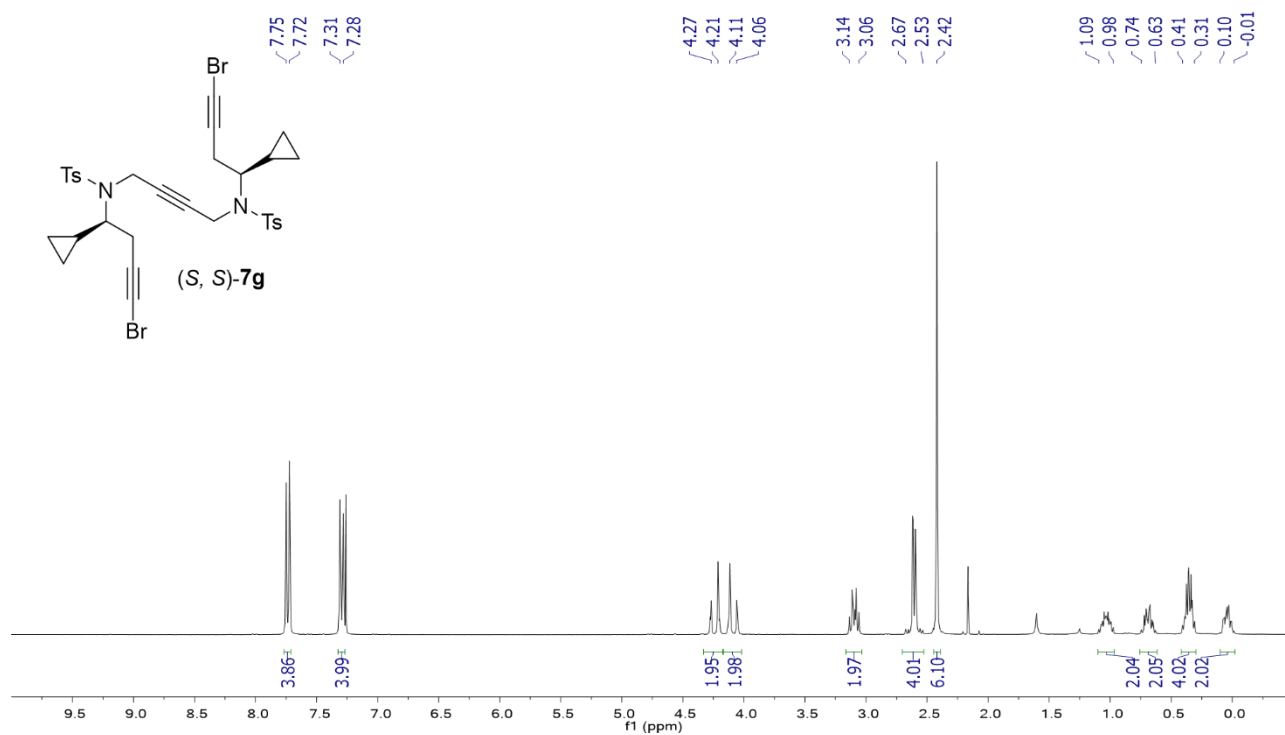

$^{13}\text{C}$  NMR spectrum of compound (*S,S*)-**7g** (75 MHz,  $\text{CDCl}_3$ )

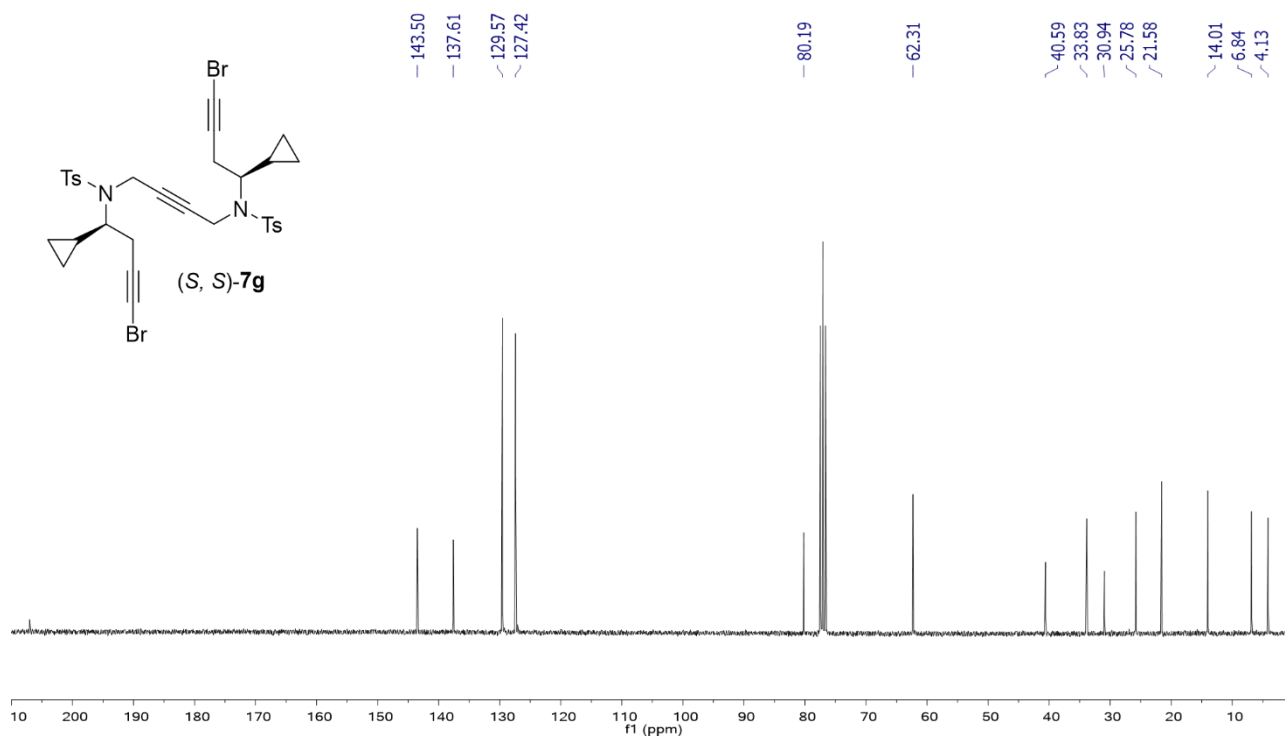

$^1\text{H}$  NMR spectrum of compound (*S,S*)-**8** (300 MHz,  $\text{CDCl}_3$ )

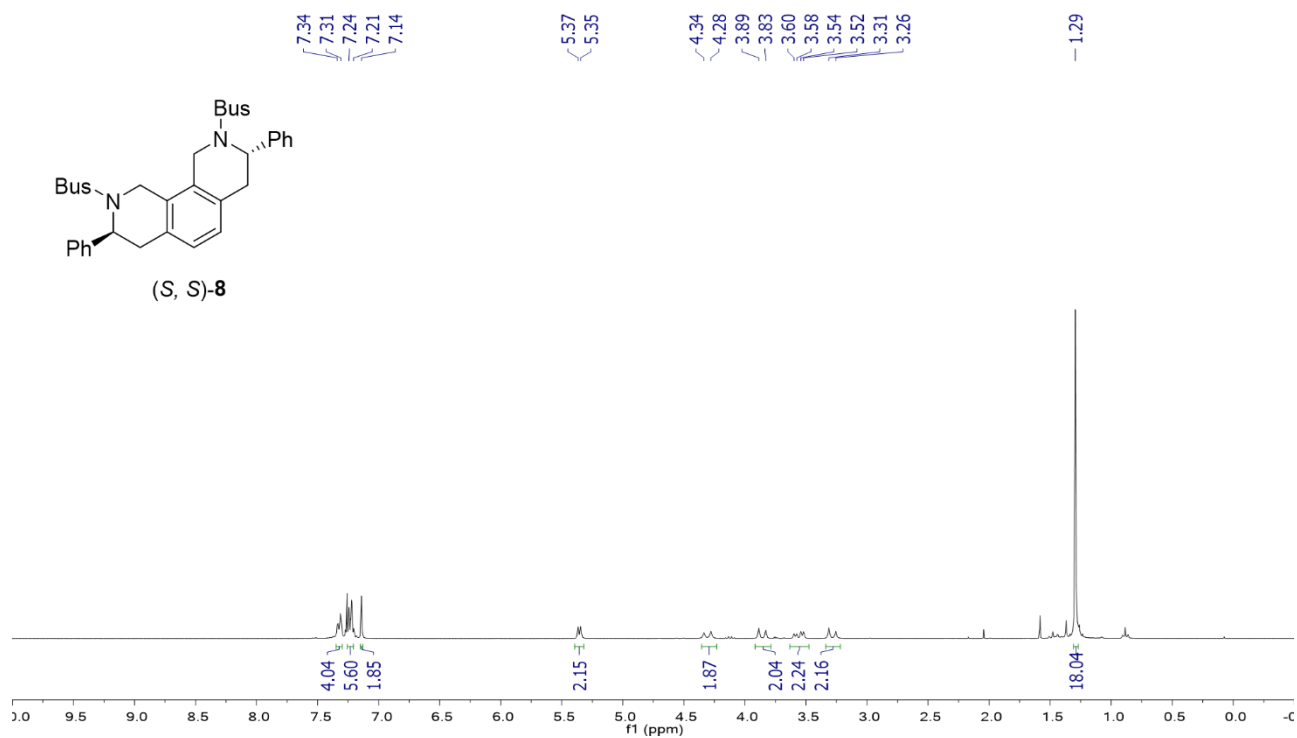

$^{13}\text{C}$  NMR spectrum of compound (*S,S*)-**8** (75 MHz,  $\text{CDCl}_3$ )

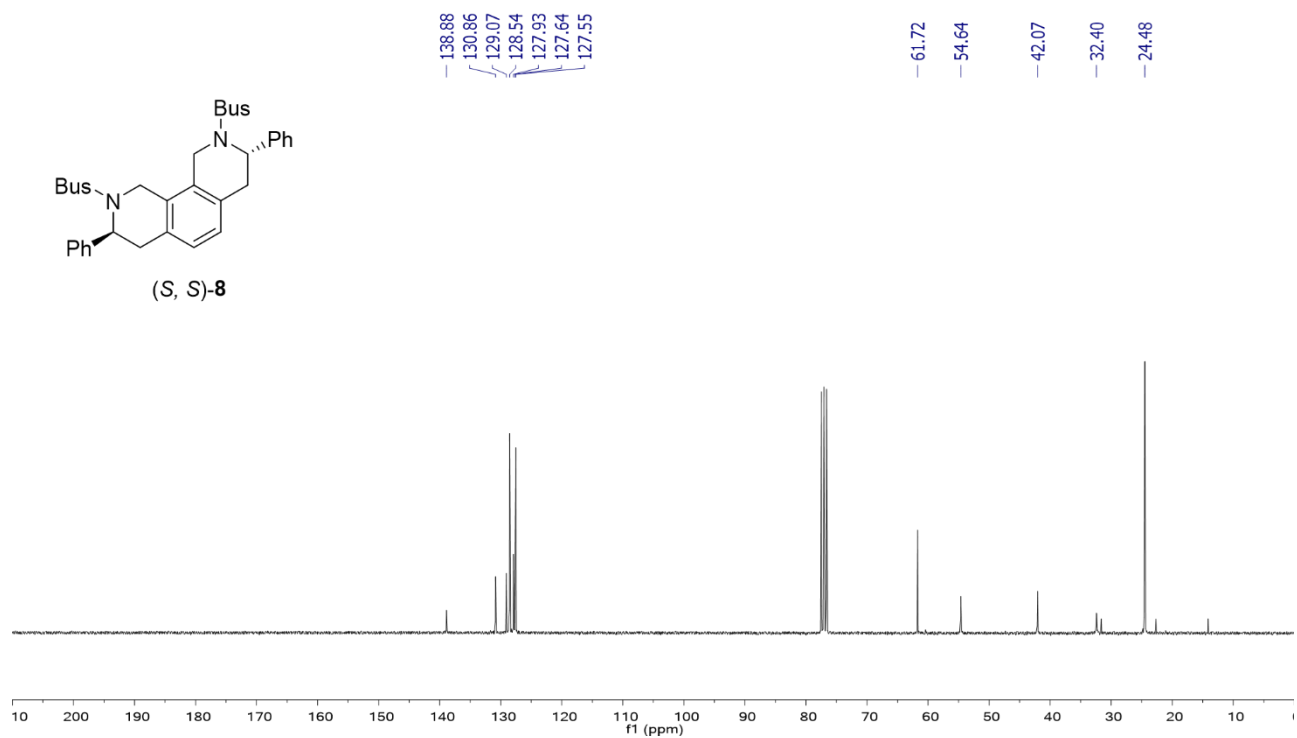

<sup>1</sup>H NMR spectrum of compound (*S,S*)-**9a** (300 MHz, CDCl<sub>3</sub>)

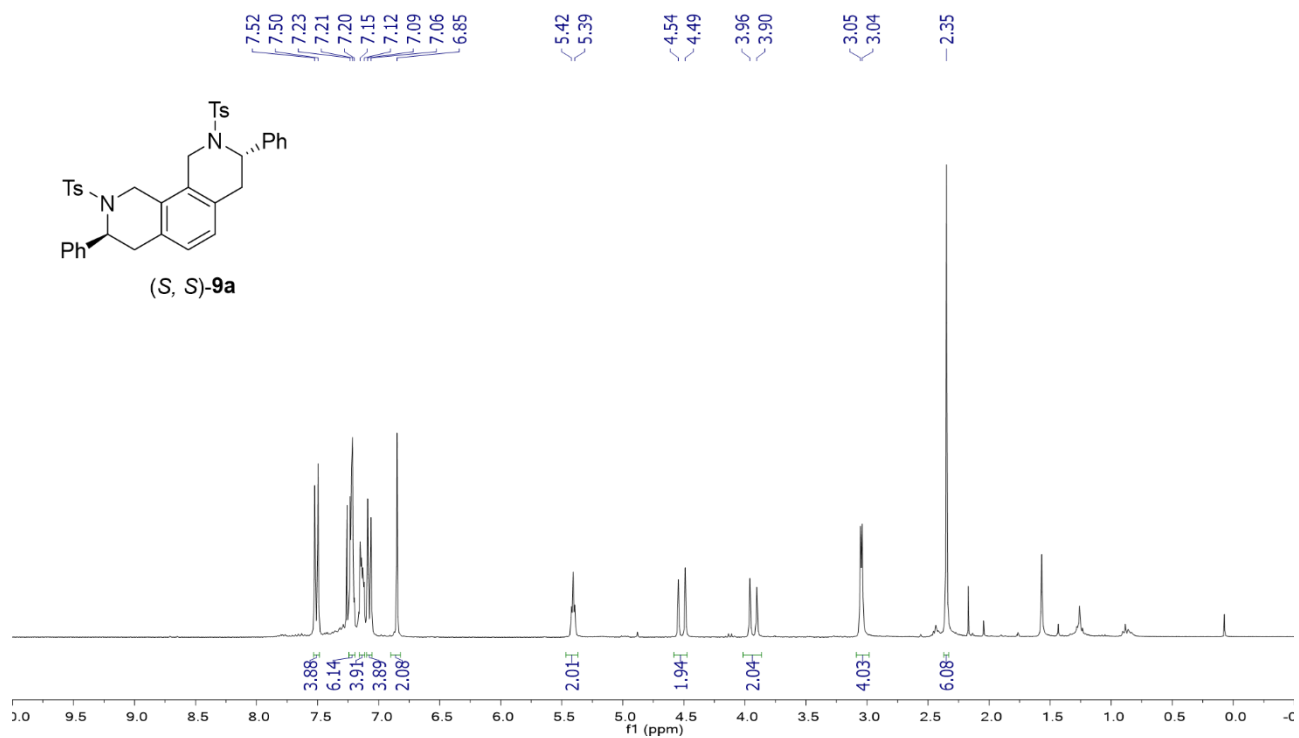

<sup>13</sup>C NMR spectrum of compound (*S,S*)-**9a** (75 MHz, CDCl<sub>3</sub>)

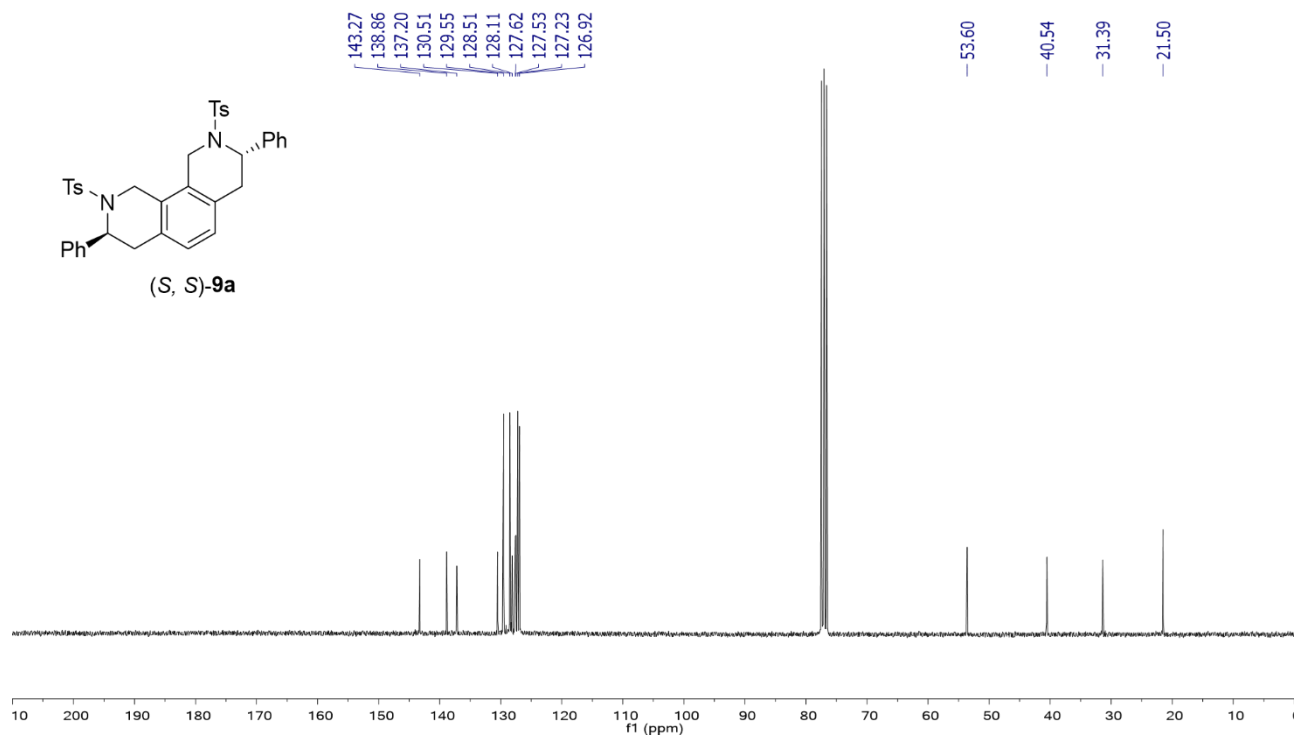

<sup>1</sup>H NMR spectrum of compound (S,S)-**9b** (300 MHz, CDCl<sub>3</sub>)

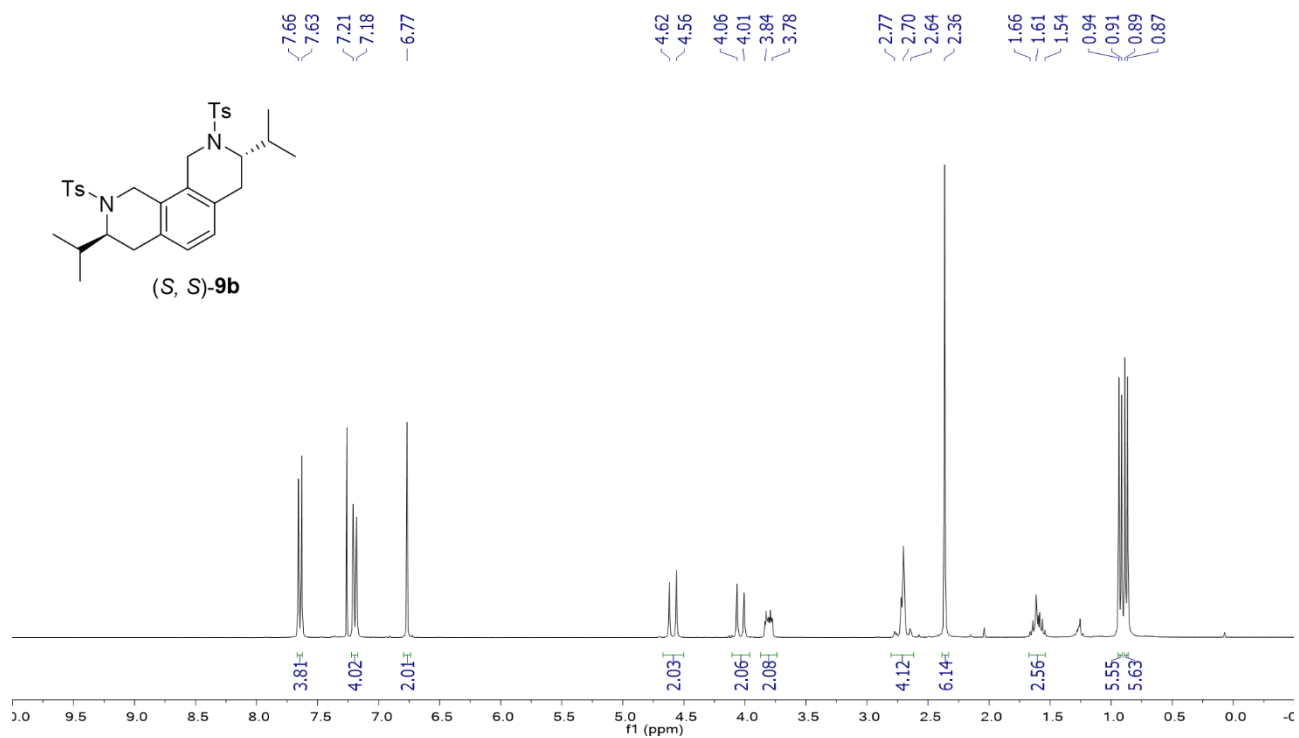

<sup>13</sup>C NMR spectrum of compound (S,S)-**9b** (75 MHz, CDCl<sub>3</sub>)

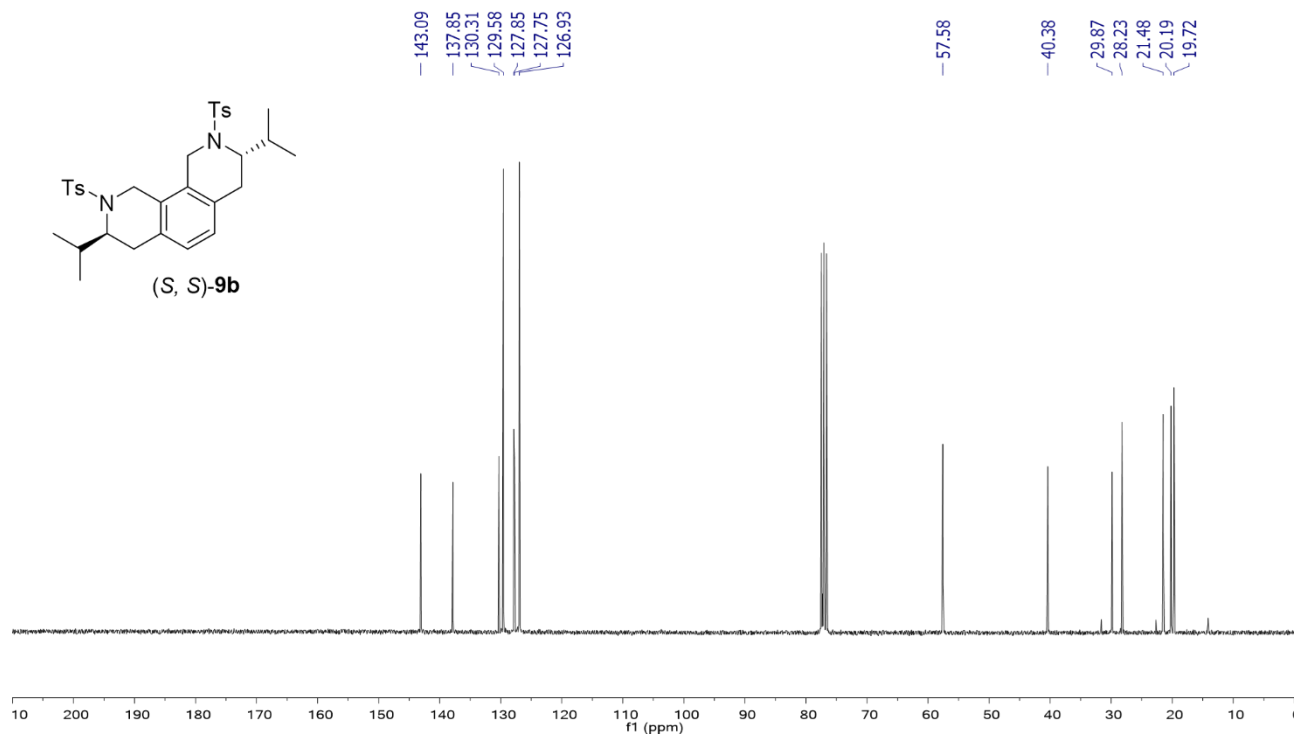

<sup>1</sup>H NMR spectrum of compound (S,S)-9c (300 MHz, CDCl<sub>3</sub>)

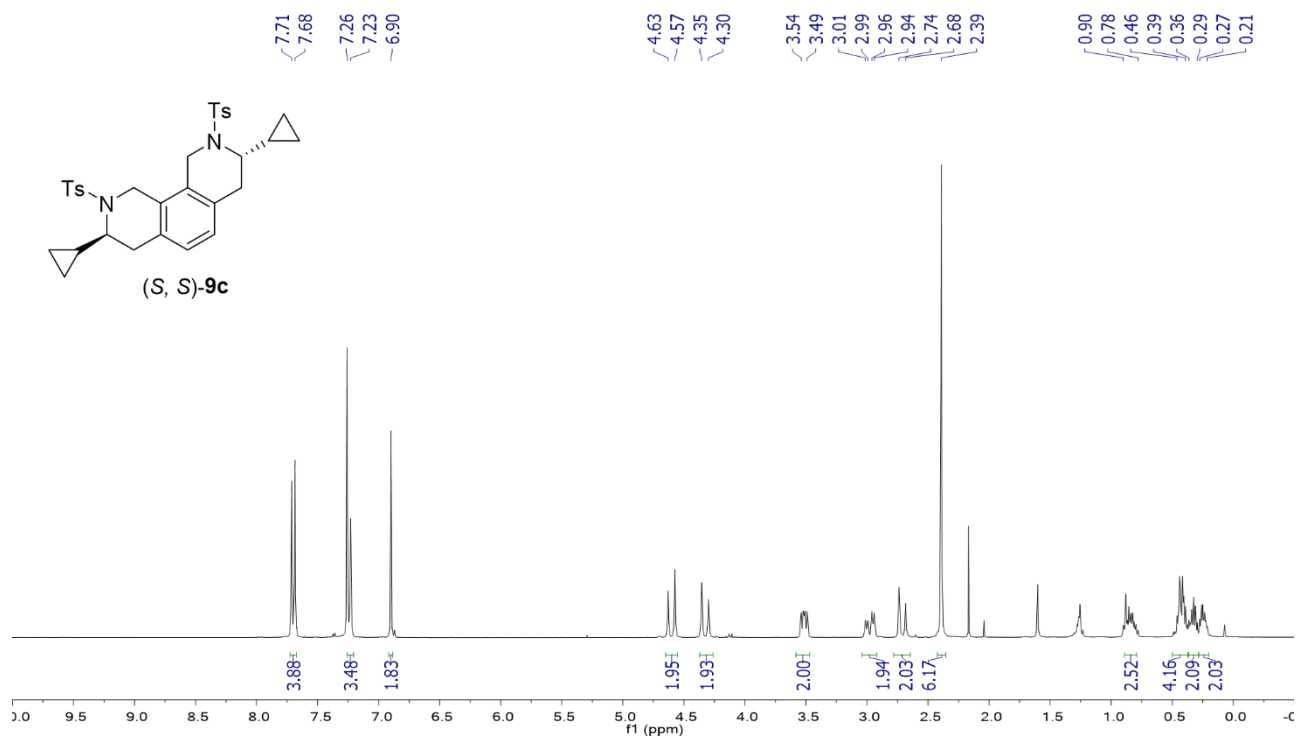

<sup>13</sup>C NMR spectrum of compound (S,S)-9c (75 MHz, CDCl<sub>3</sub>)

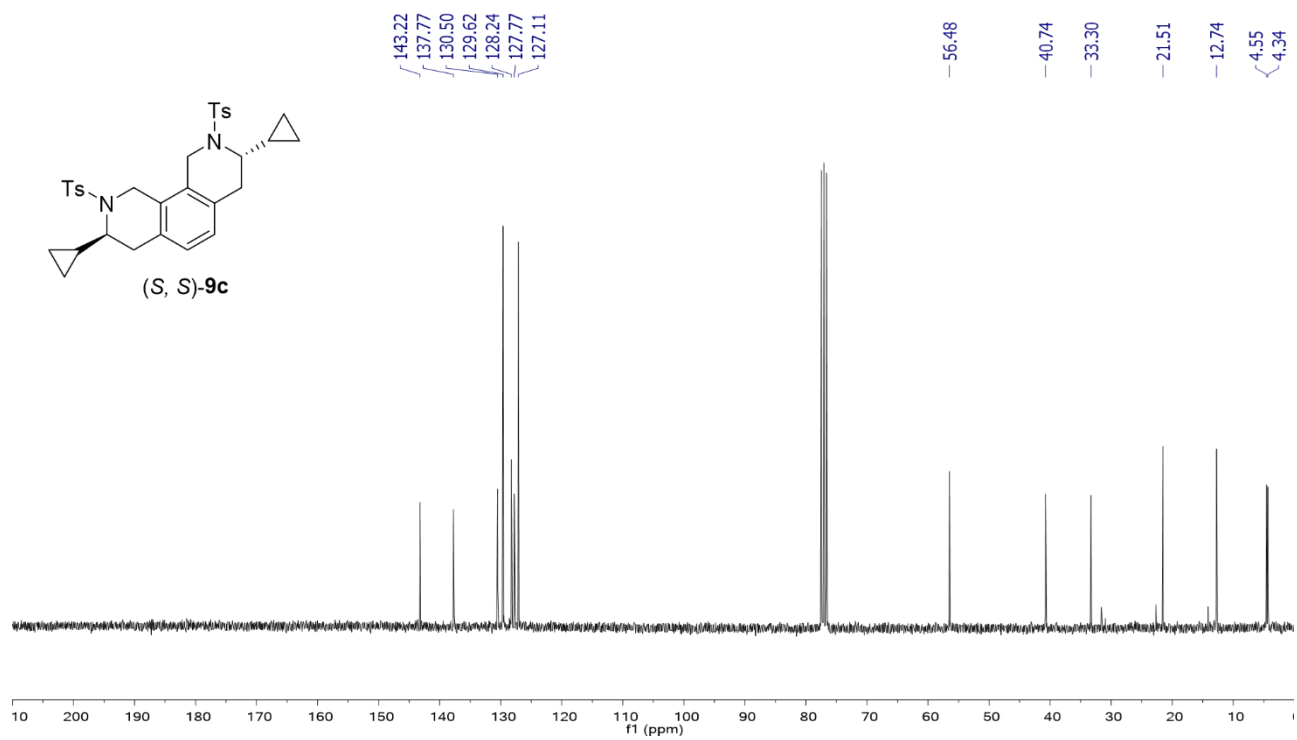

<sup>1</sup>H NMR spectrum of compound (S,S)-9d (300 MHz, CDCl<sub>3</sub>)

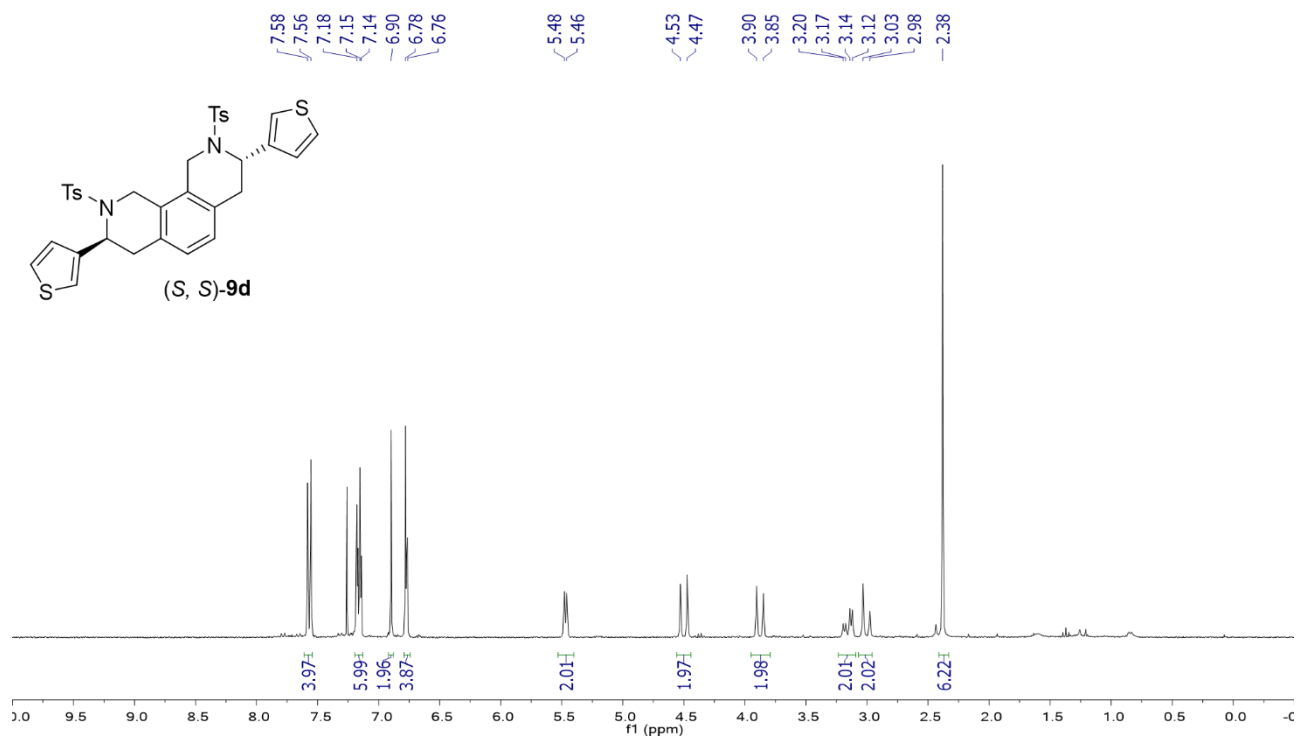

<sup>13</sup>C NMR spectrum of compound (S,S)-9d (75 MHz, CDCl<sub>3</sub>)

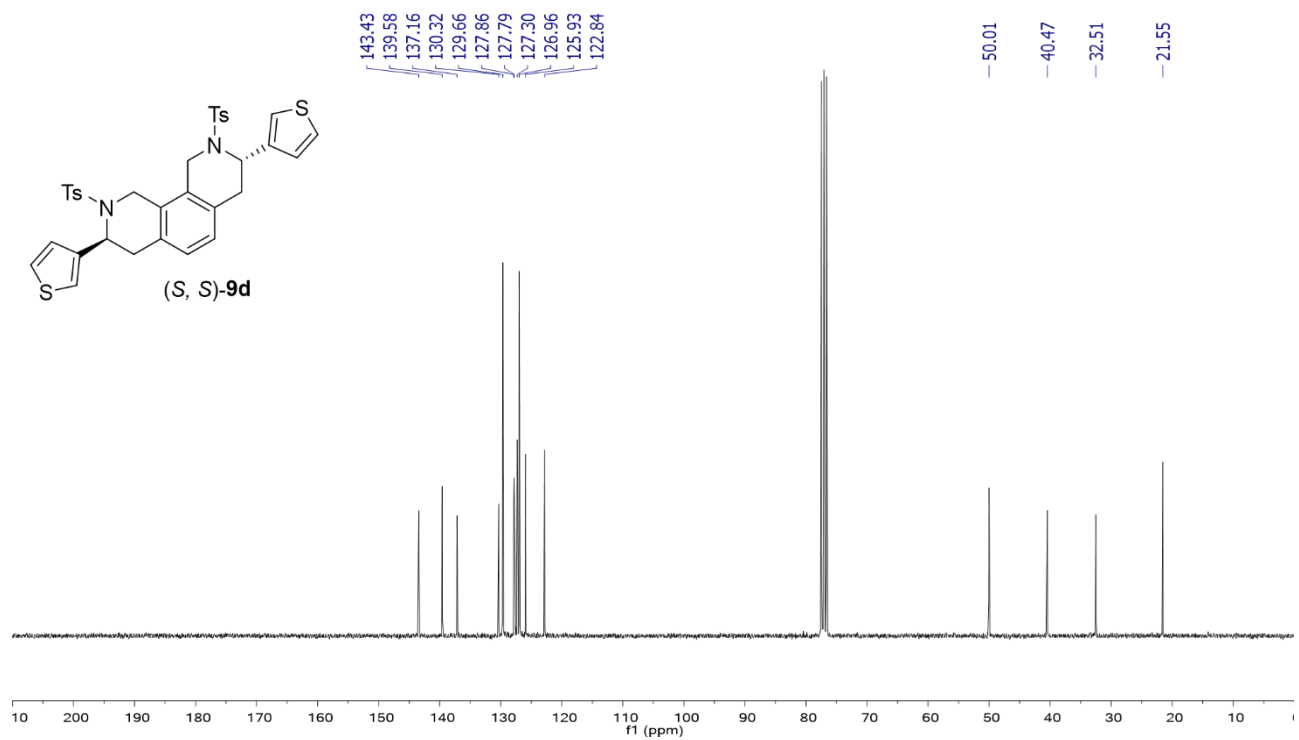



$^1\text{H}$  NMR spectrum of compound (*S,S*)-**9e** (300 MHz,  $\text{CDCl}_3$ )

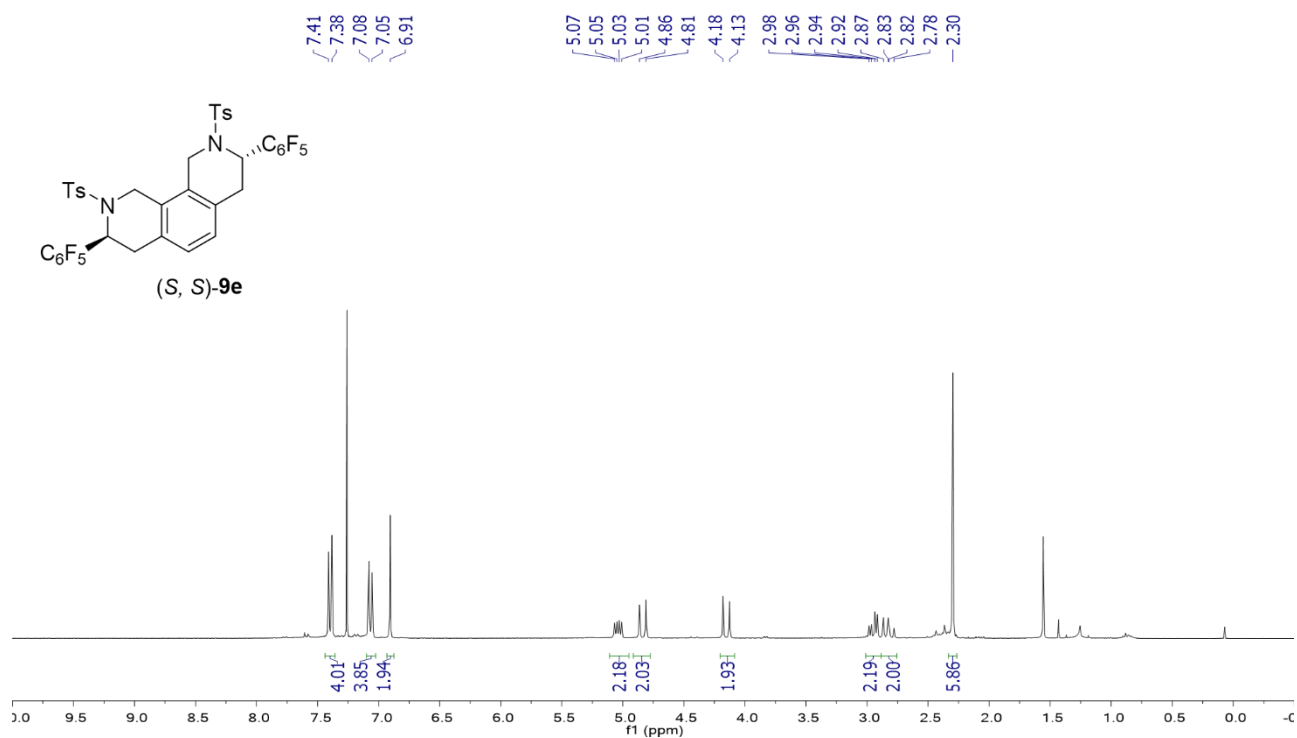

$^{19}\text{F}$  NMR spectrum of compound (*S,S*)-**9e** (282 MHz,  $\text{CDCl}_3$ )

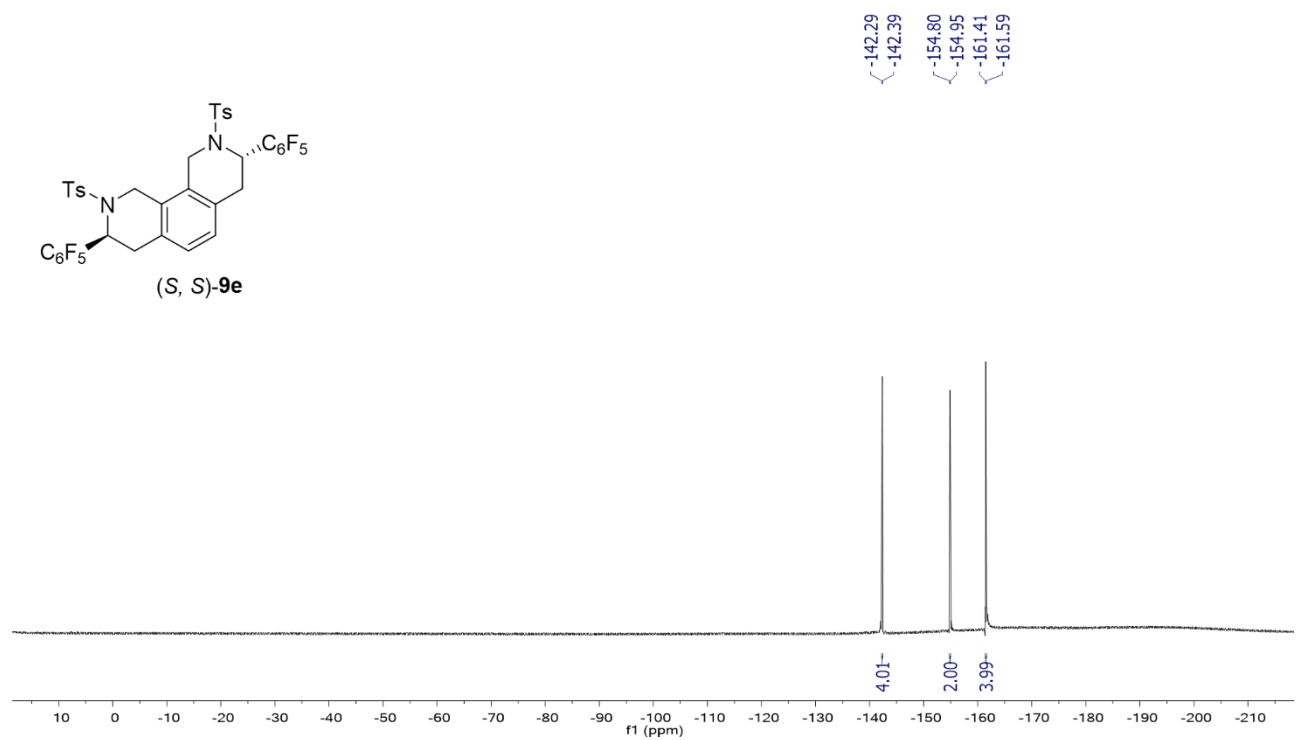

$^{13}\text{C}$  NMR spectrum of compound (*S,S*)-**9e** (75 MHz,  $\text{CDCl}_3$ )

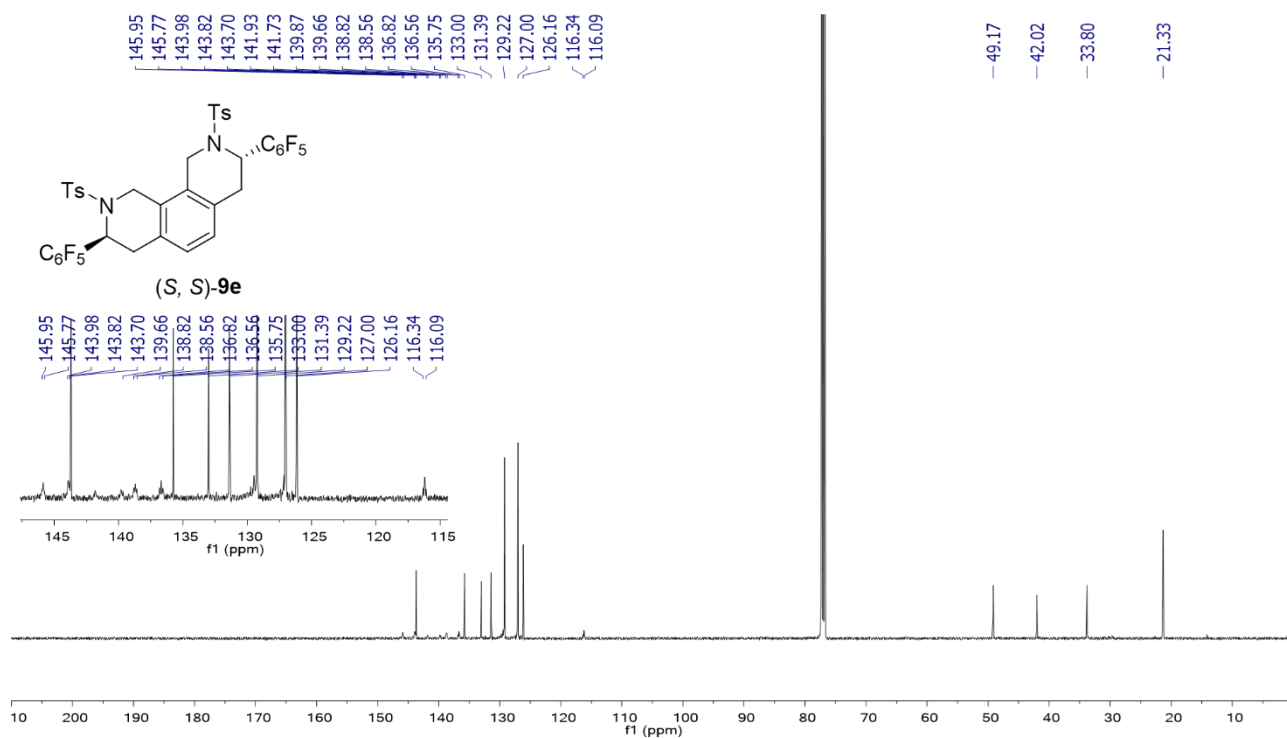

$^1\text{H}$  NMR spectrum of compound (*R,R*)-**9e** (300 MHz,  $\text{CDCl}_3$ )

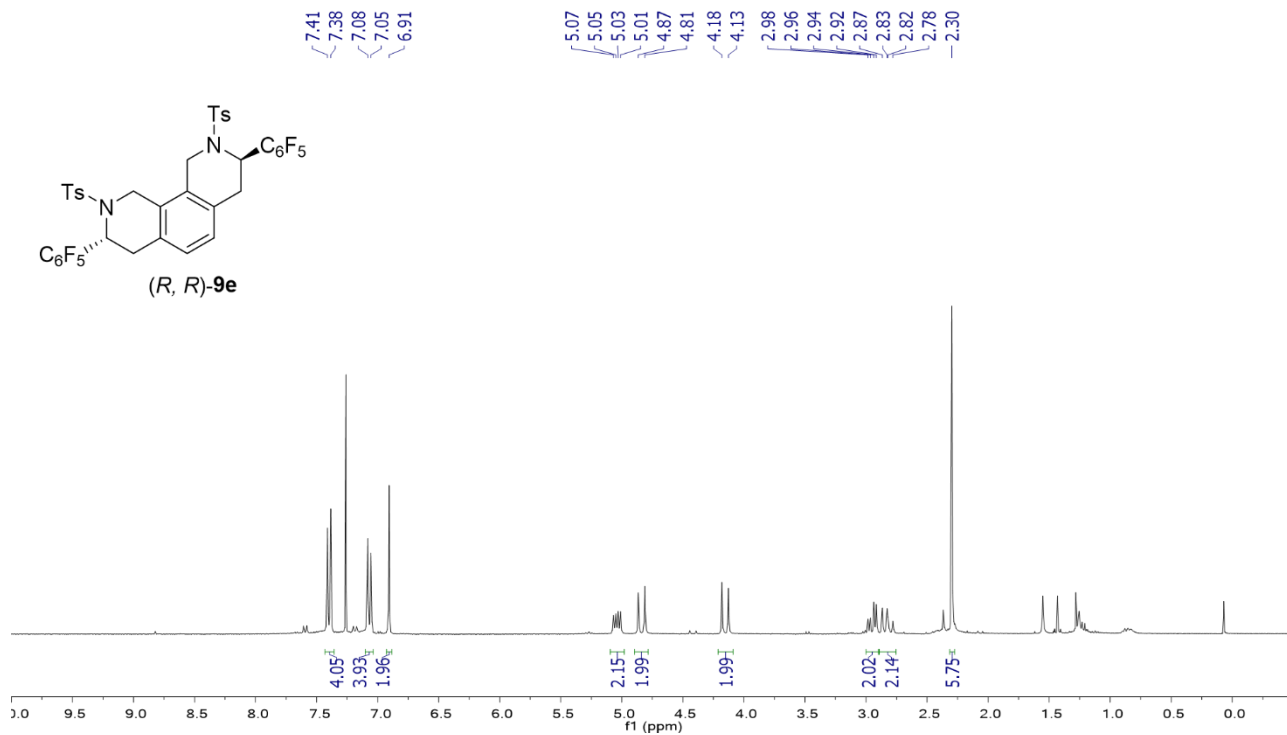

$^{19}\text{F}$  NMR spectrum of compound (*R,R*)-**9e** (282 MHz,  $\text{CDCl}_3$ )

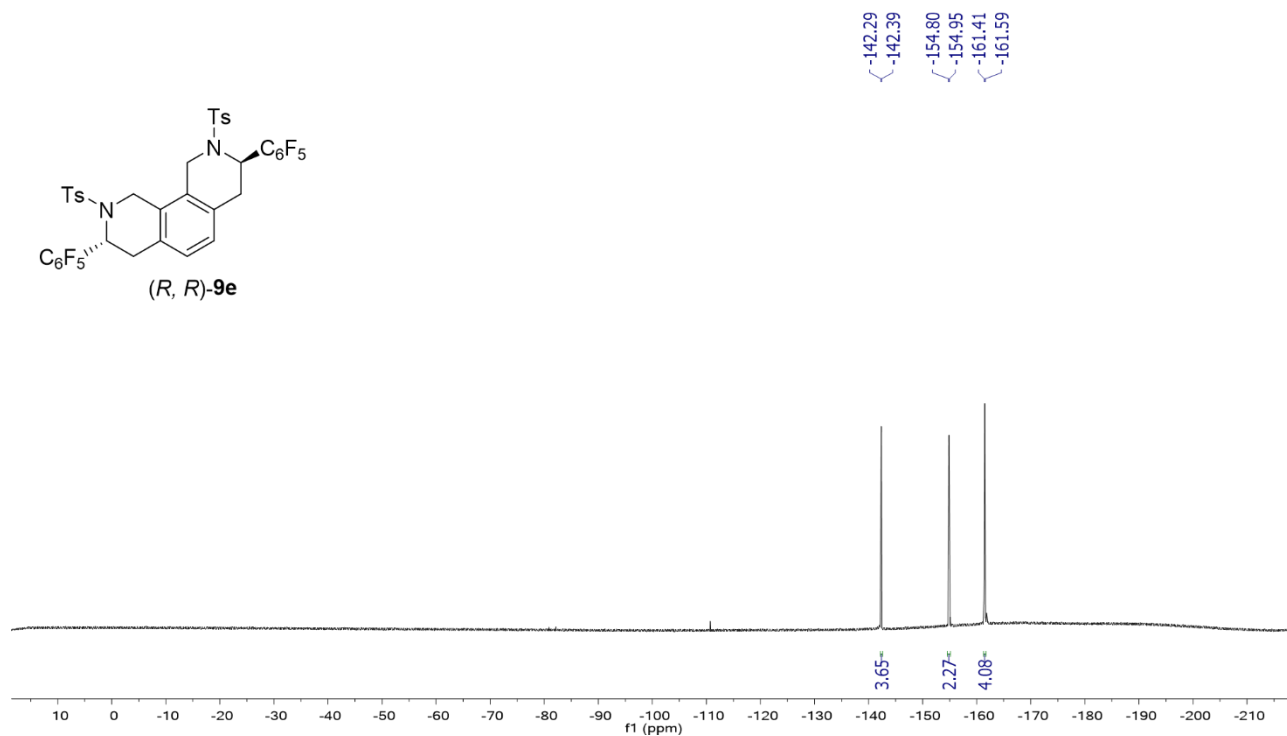

$^{13}\text{C}$  NMR spectrum of compound (*R,R*)-**9e** (75 MHz,  $\text{CDCl}_3$ )

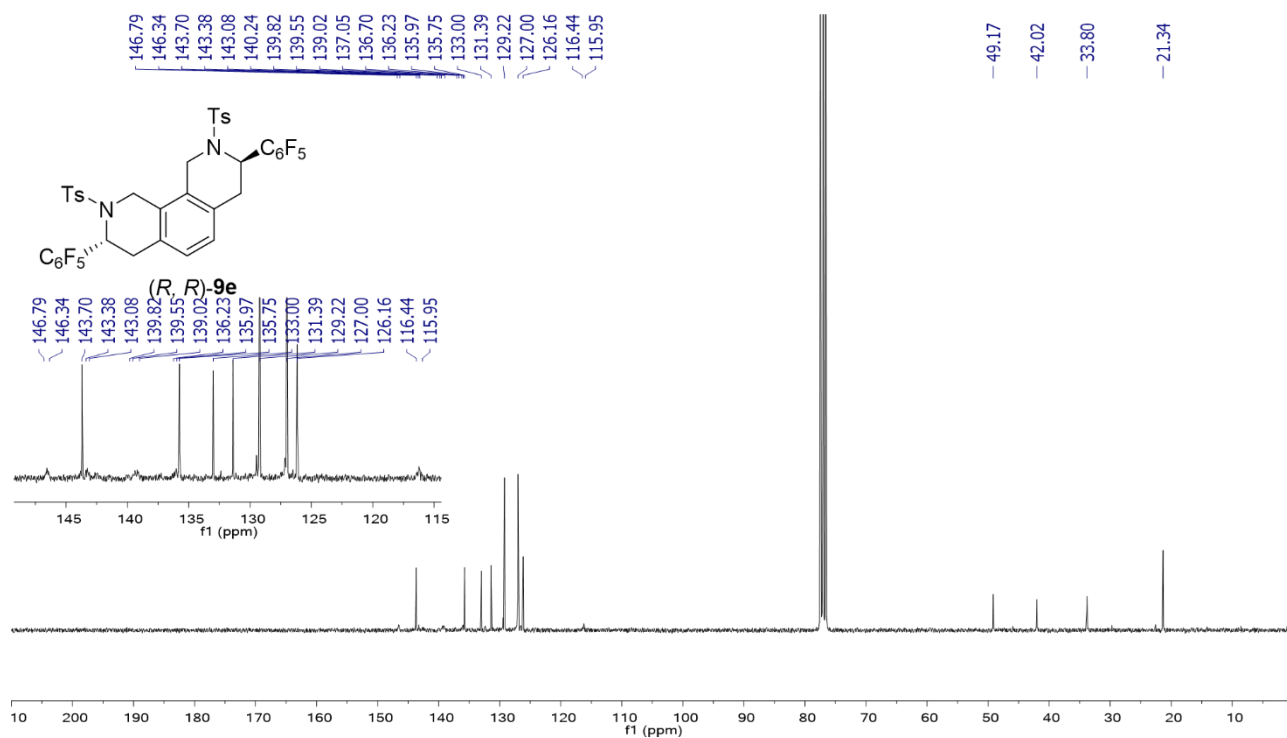

$^1\text{H}$  NMR spectrum of compound (*S,S*)-**9f** (300 MHz,  $\text{CDCl}_3$ )

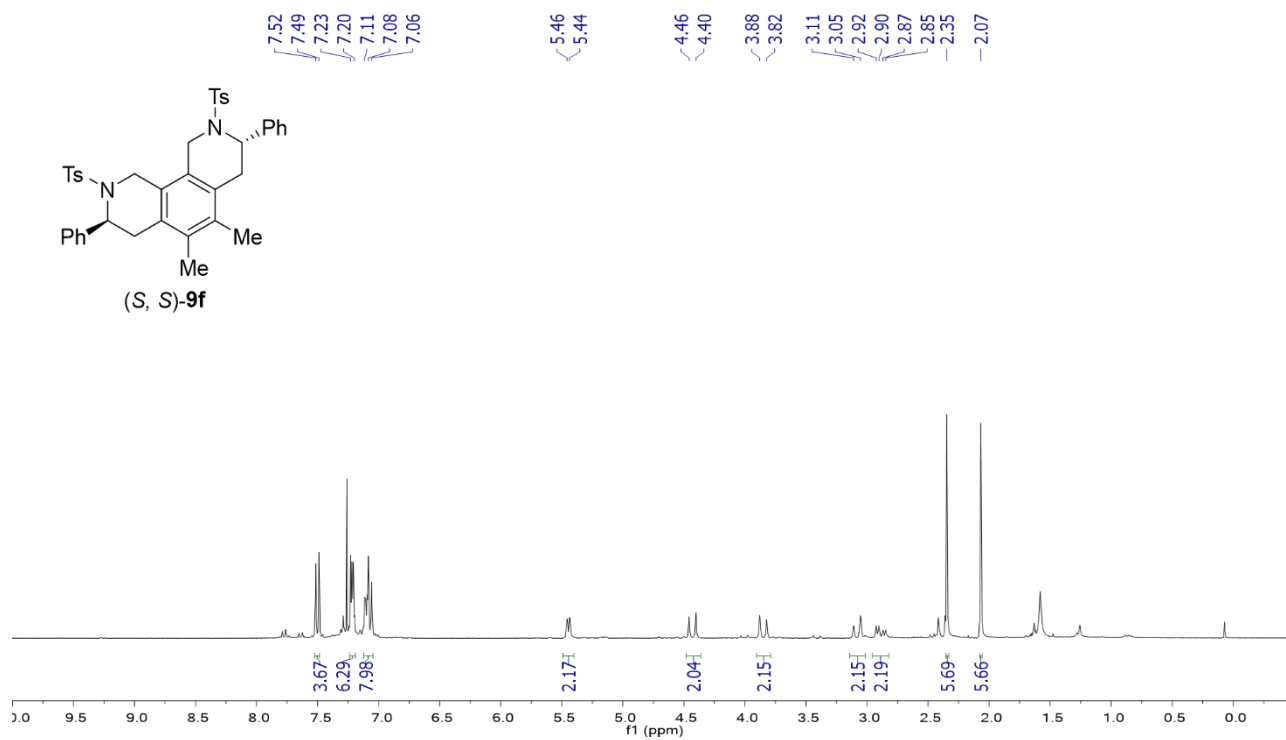

$^{13}\text{C}$  NMR spectrum of compound (*S,S*)-**9f** (75 MHz,  $\text{CDCl}_3$ )

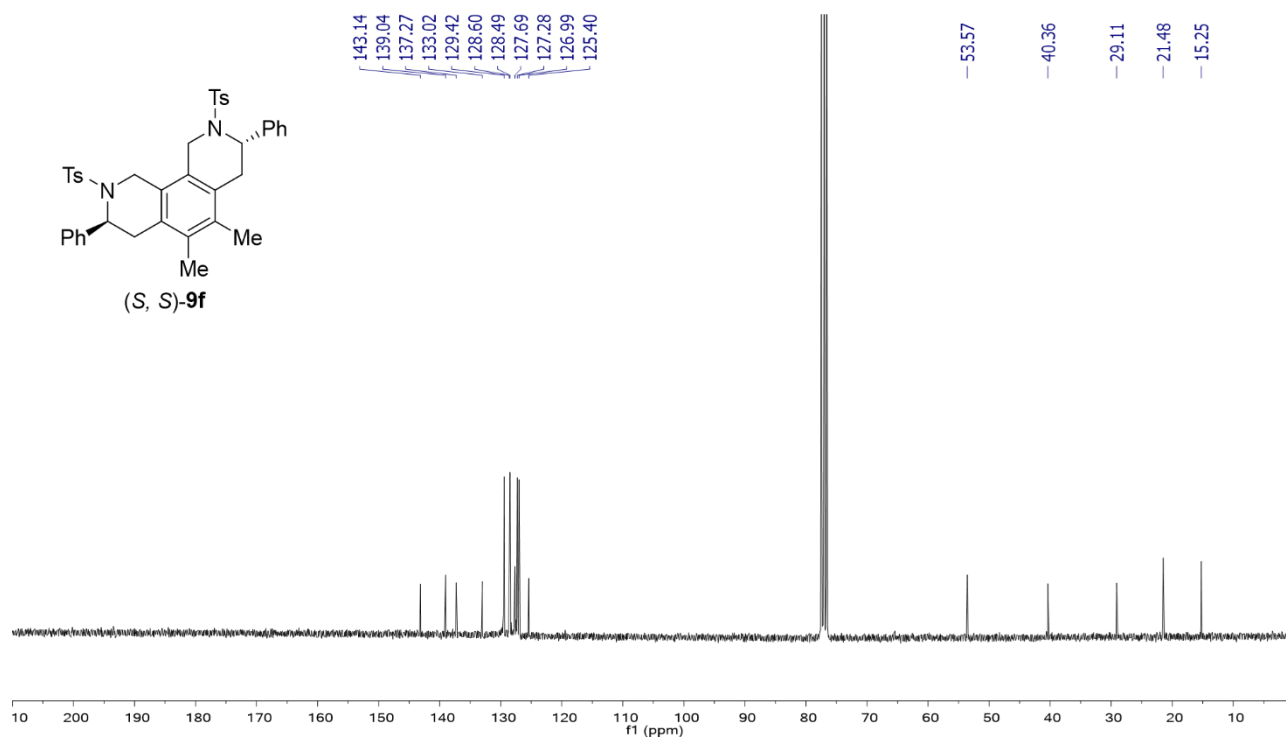

<sup>1</sup>H NMR spectrum of compound (S,S)-9g (300 MHz, CDCl<sub>3</sub>)

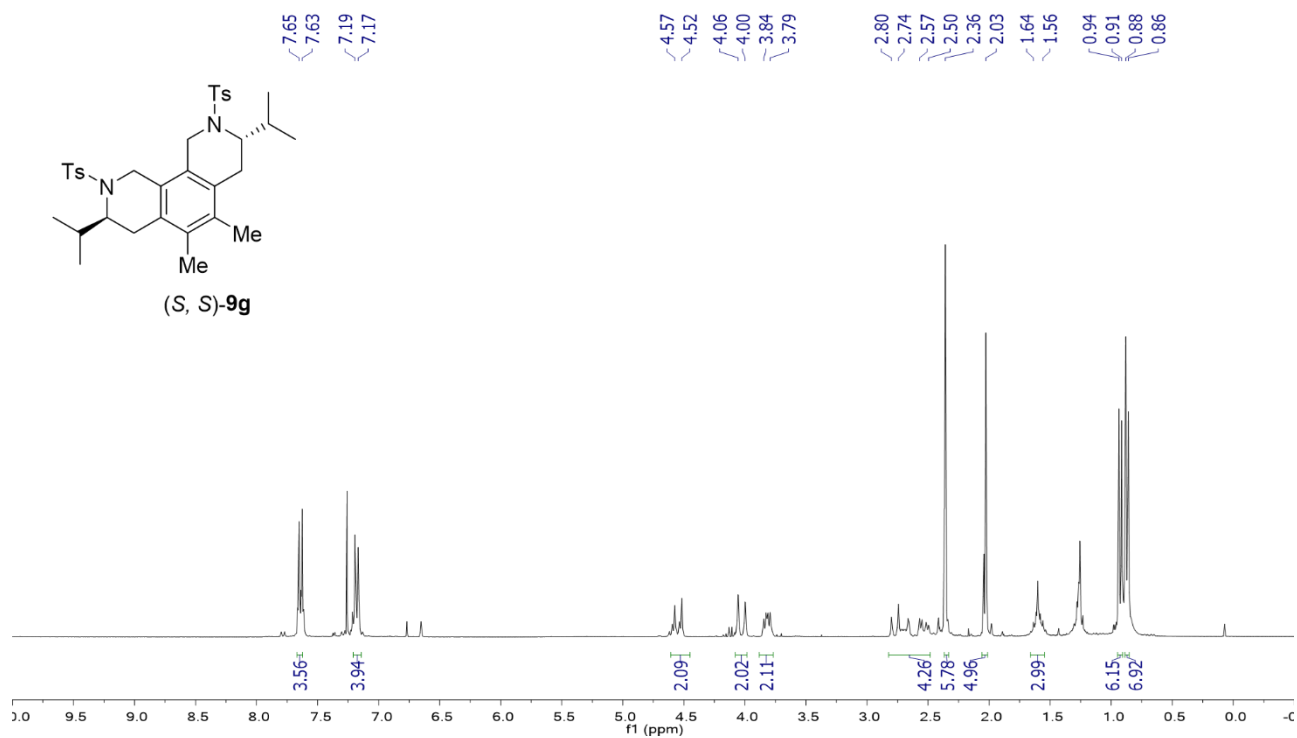

<sup>13</sup>C NMR spectrum of compound (S,S)-9g (75 MHz, CDCl<sub>3</sub>)

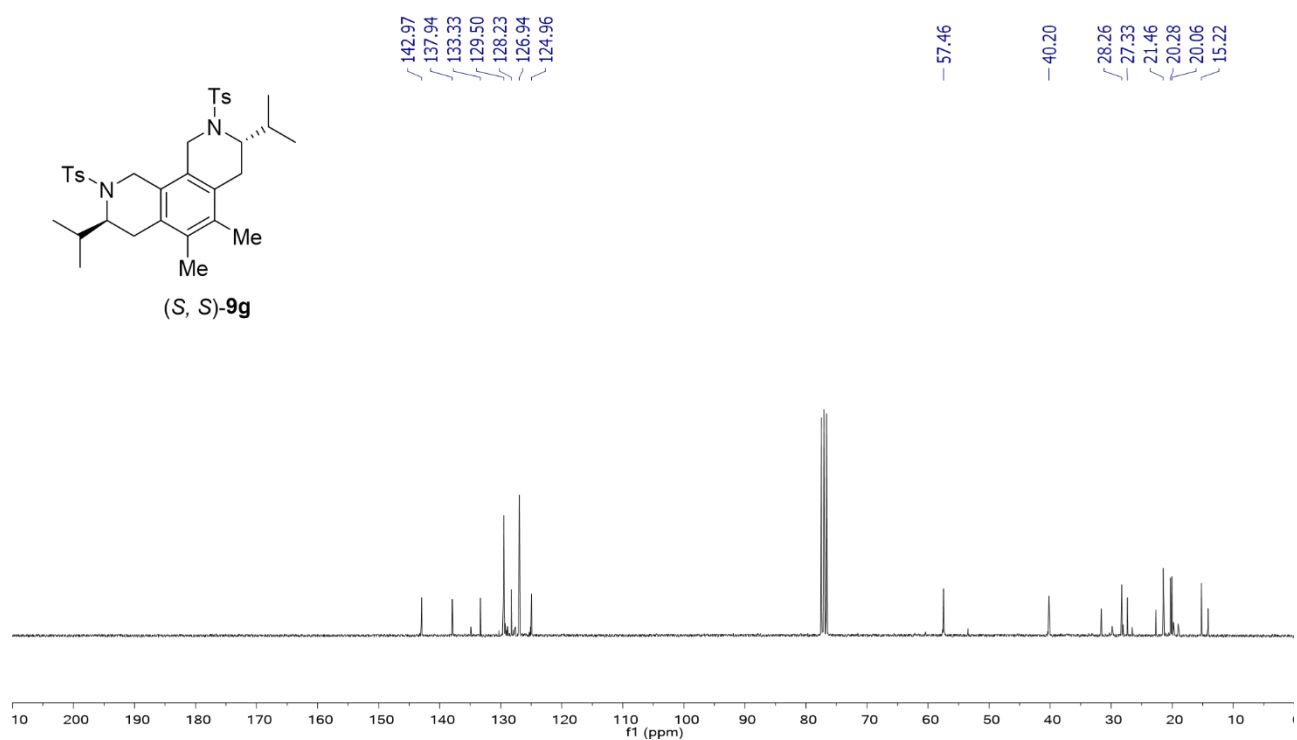

<sup>1</sup>H NMR spectrum of compound (S,S)-9h (300 MHz, CDCl<sub>3</sub>)

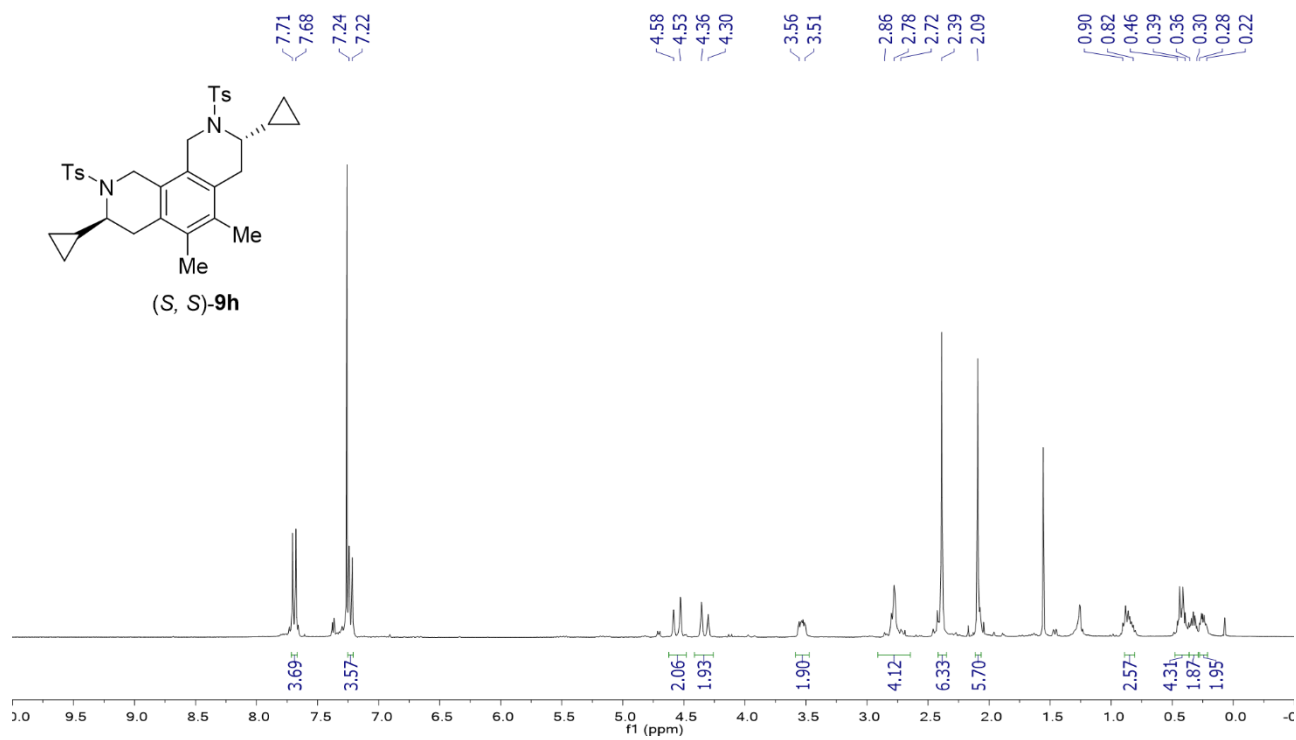

<sup>13</sup>C NMR spectrum of compound (S,S)-9h (75 MHz, CDCl<sub>3</sub>)

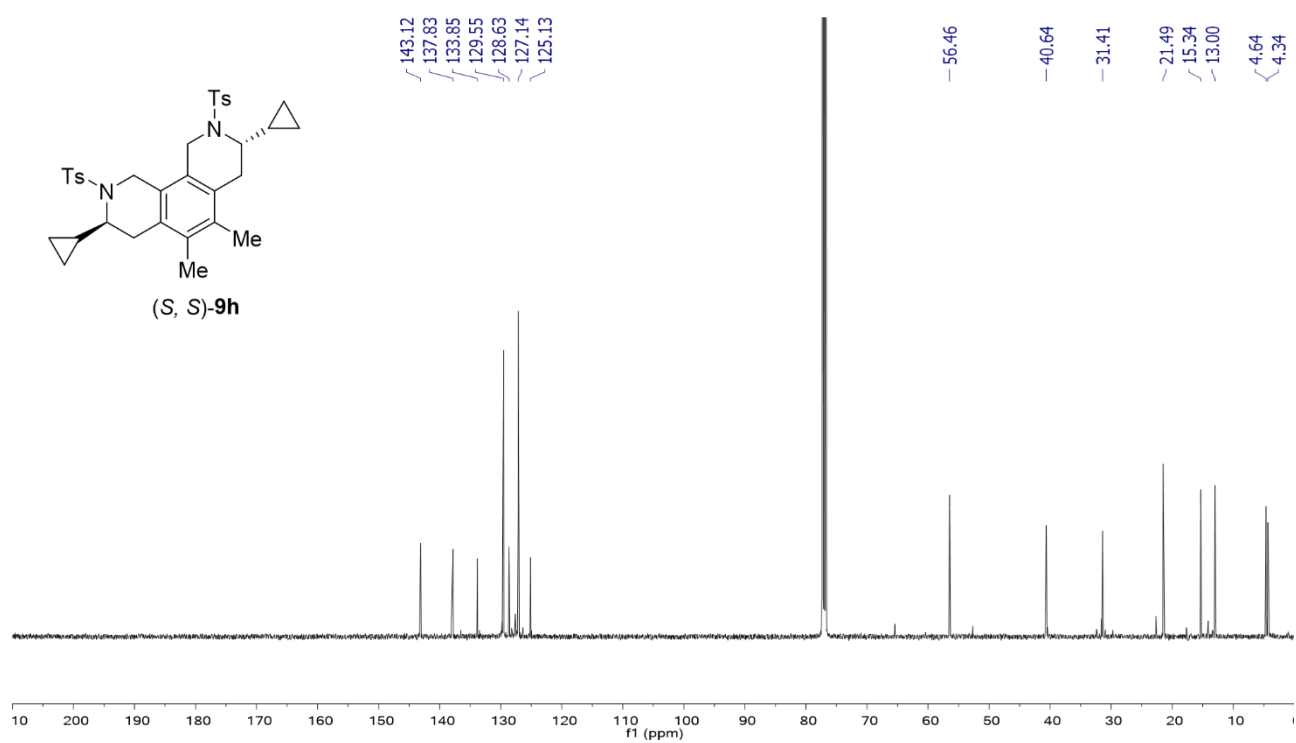

<sup>1</sup>H NMR spectrum of compound (S,S)-9i (300 MHz, CDCl<sub>3</sub>)

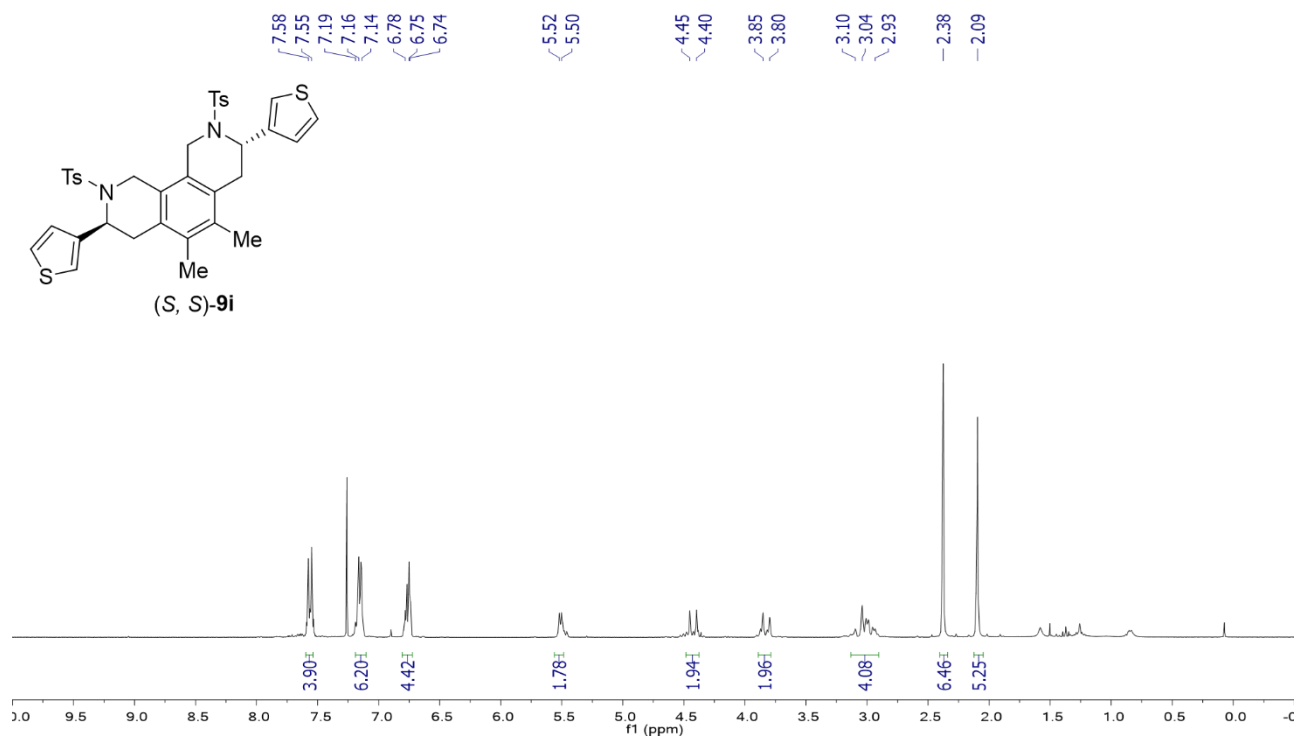

<sup>13</sup>C NMR spectrum of compound (S,S)-9i (75 MHz, CDCl<sub>3</sub>)

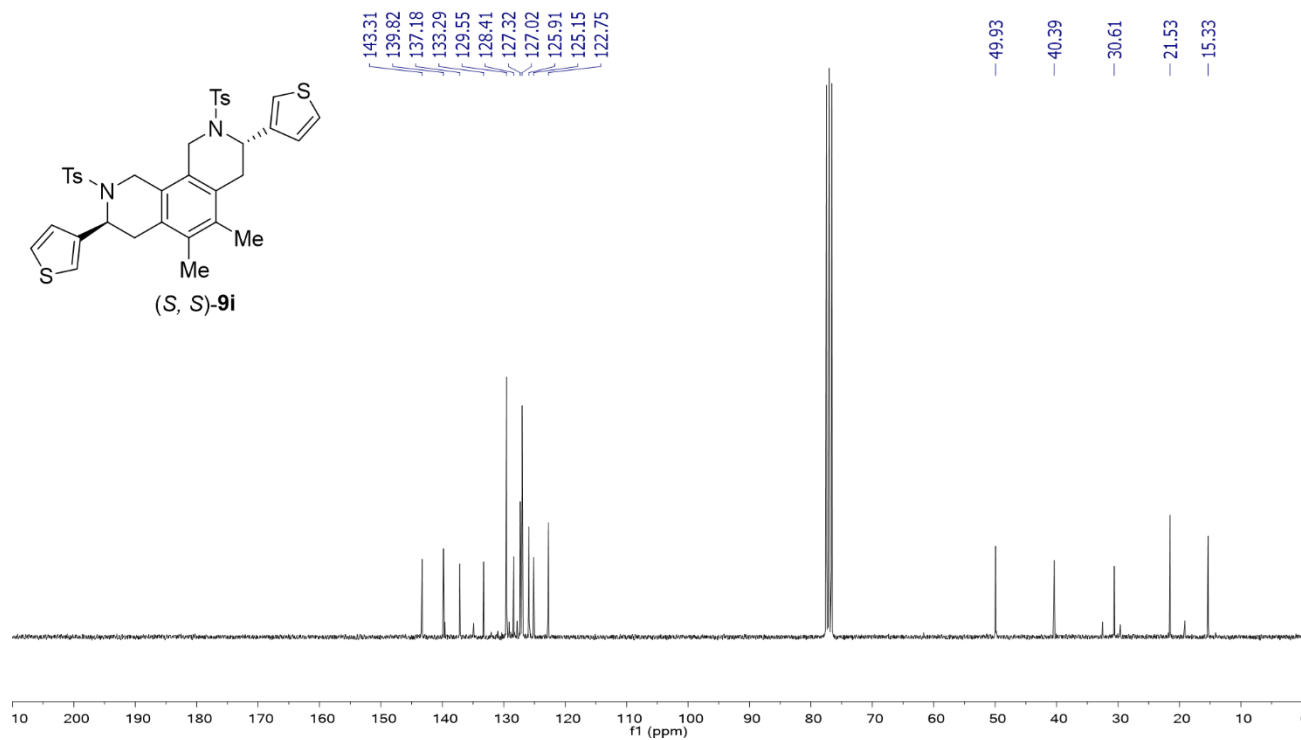

<sup>1</sup>H NMR spectrum of compound (*S,S*)-**9j** (300 MHz, CDCl<sub>3</sub>)

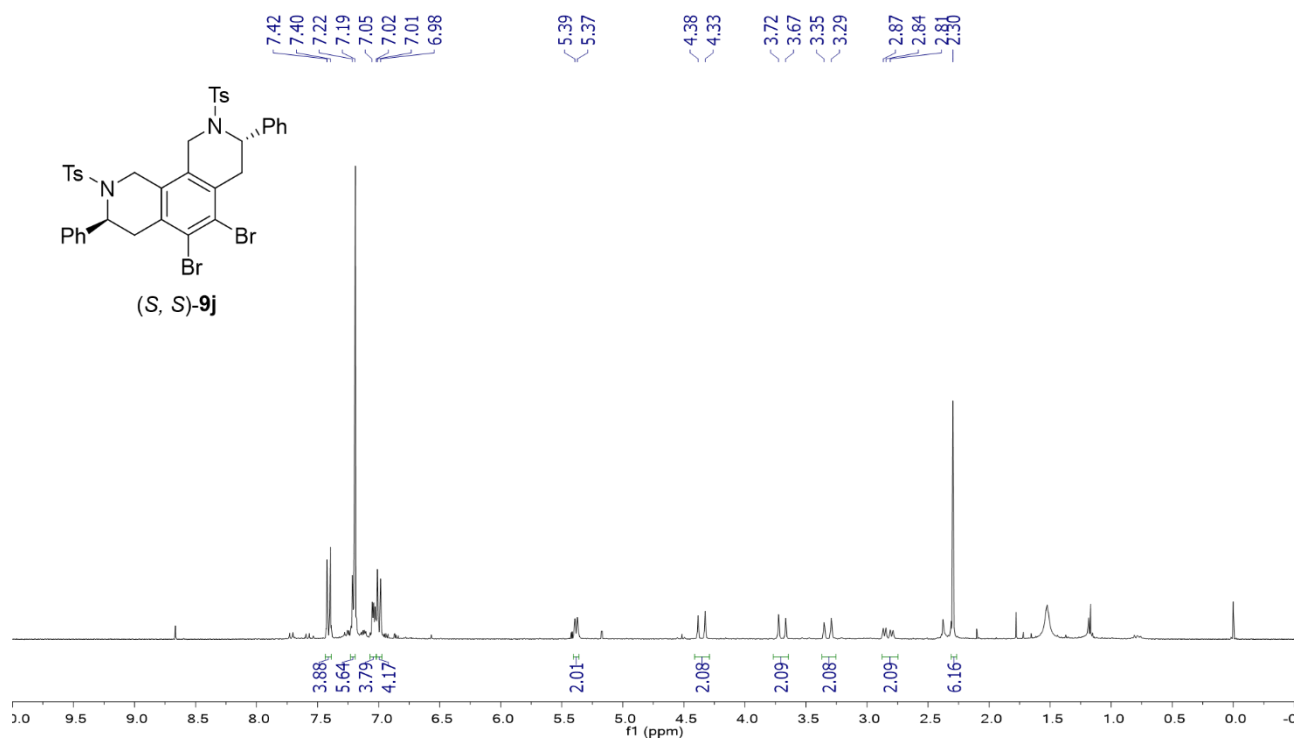

<sup>13</sup>C NMR spectrum of compound (*S,S*)-**9j** (75 MHz, CDCl<sub>3</sub>)

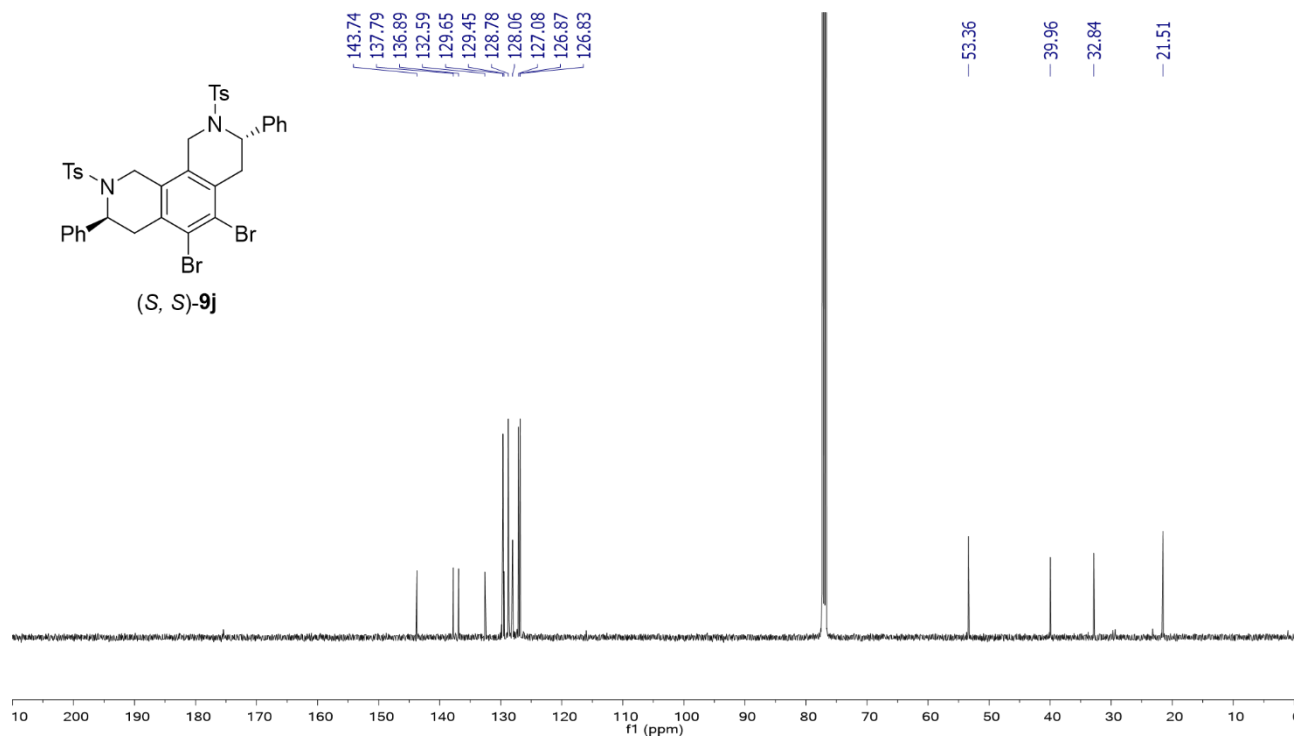



<sup>1</sup>H NMR spectrum of compound (S,S)-9k (300 MHz, CDCl<sub>3</sub>)

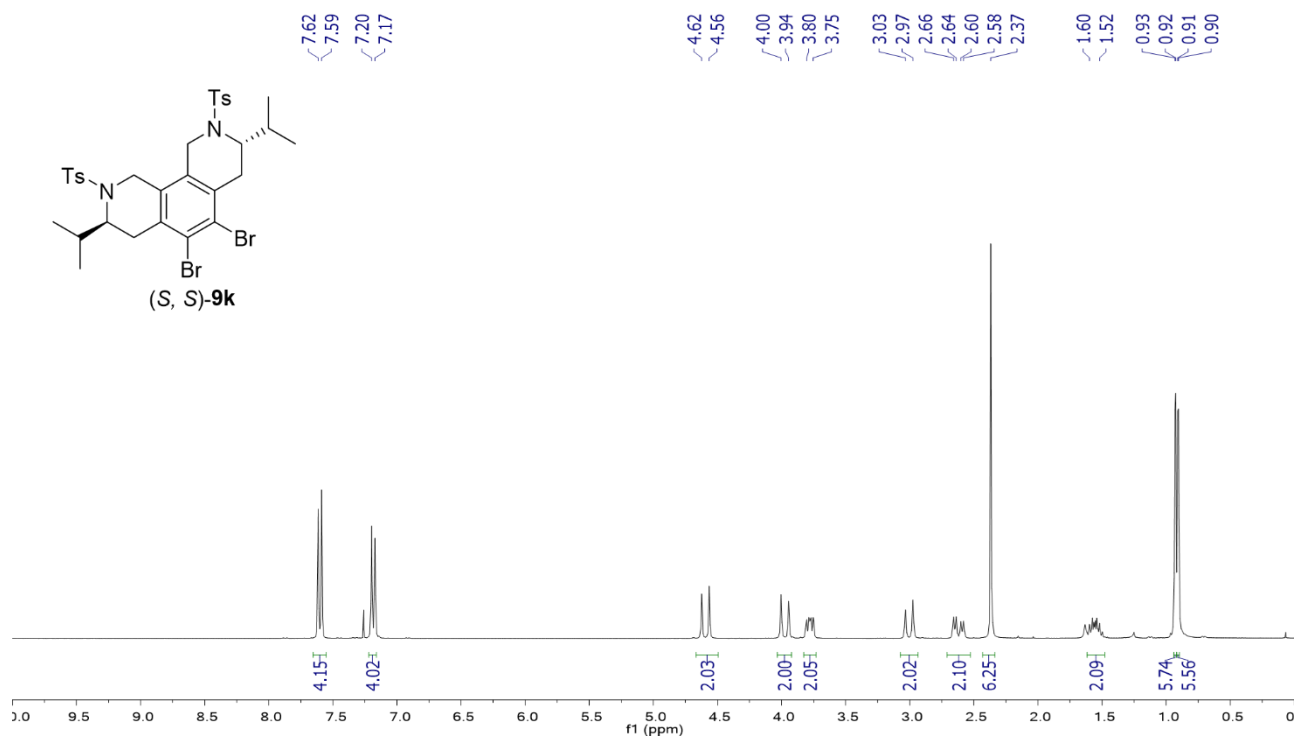

<sup>13</sup>C NMR spectrum of compound (S,S)-9k (75 MHz, CDCl<sub>3</sub>)

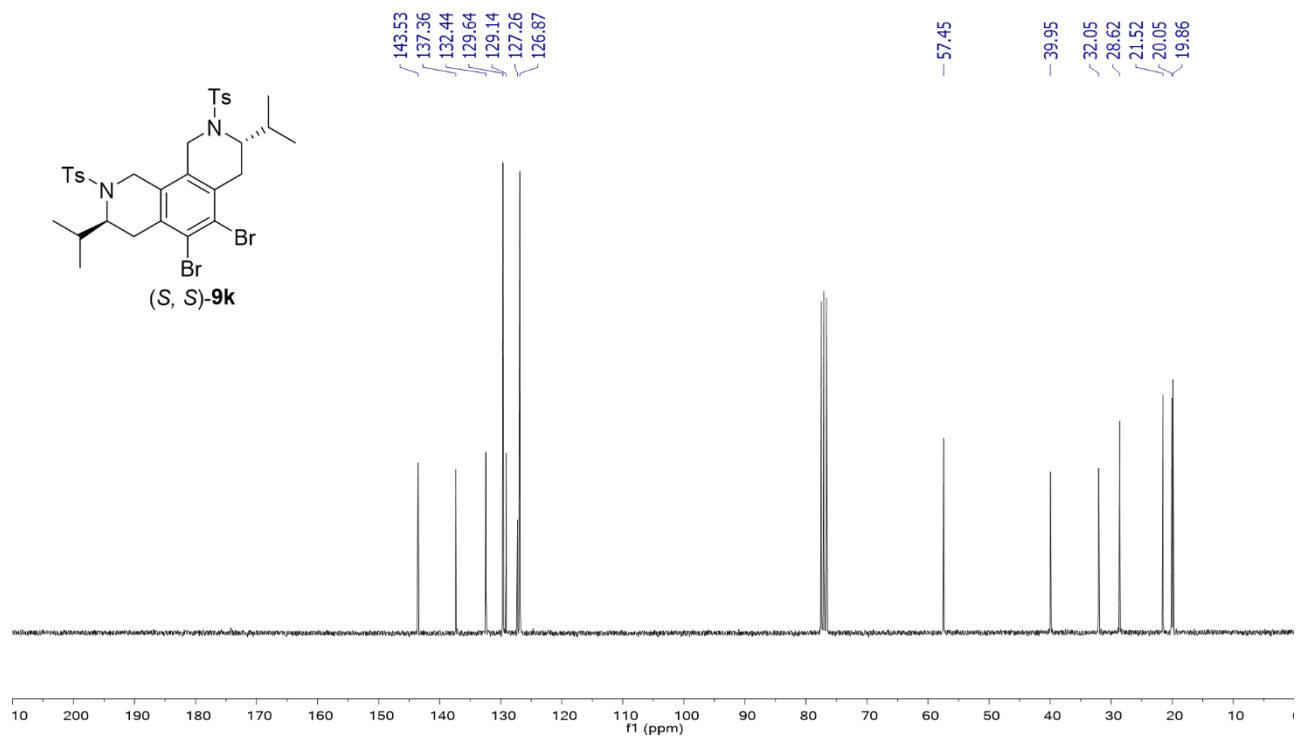

<sup>1</sup>H NMR spectrum of compound (S,S)-9I (300 MHz, CDCl<sub>3</sub>)

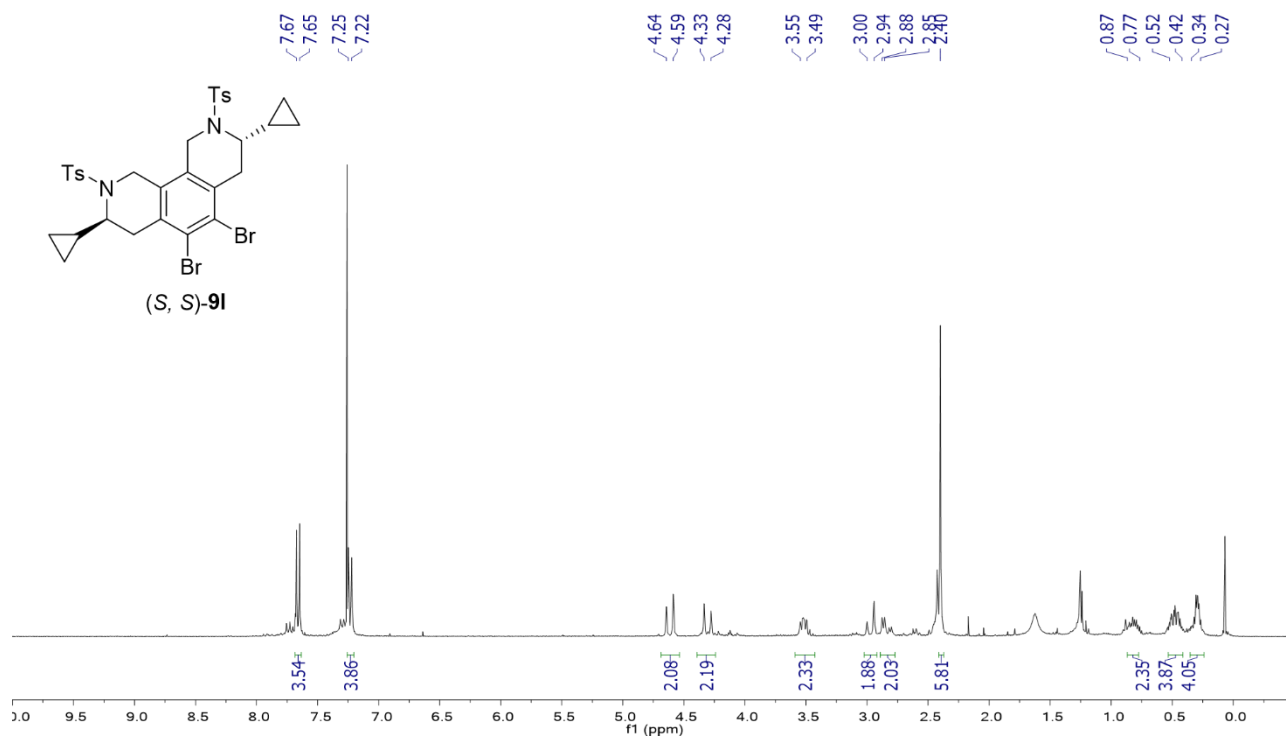

<sup>13</sup>C NMR spectrum of compound (S,S)-9I (75 MHz, CDCl<sub>3</sub>)

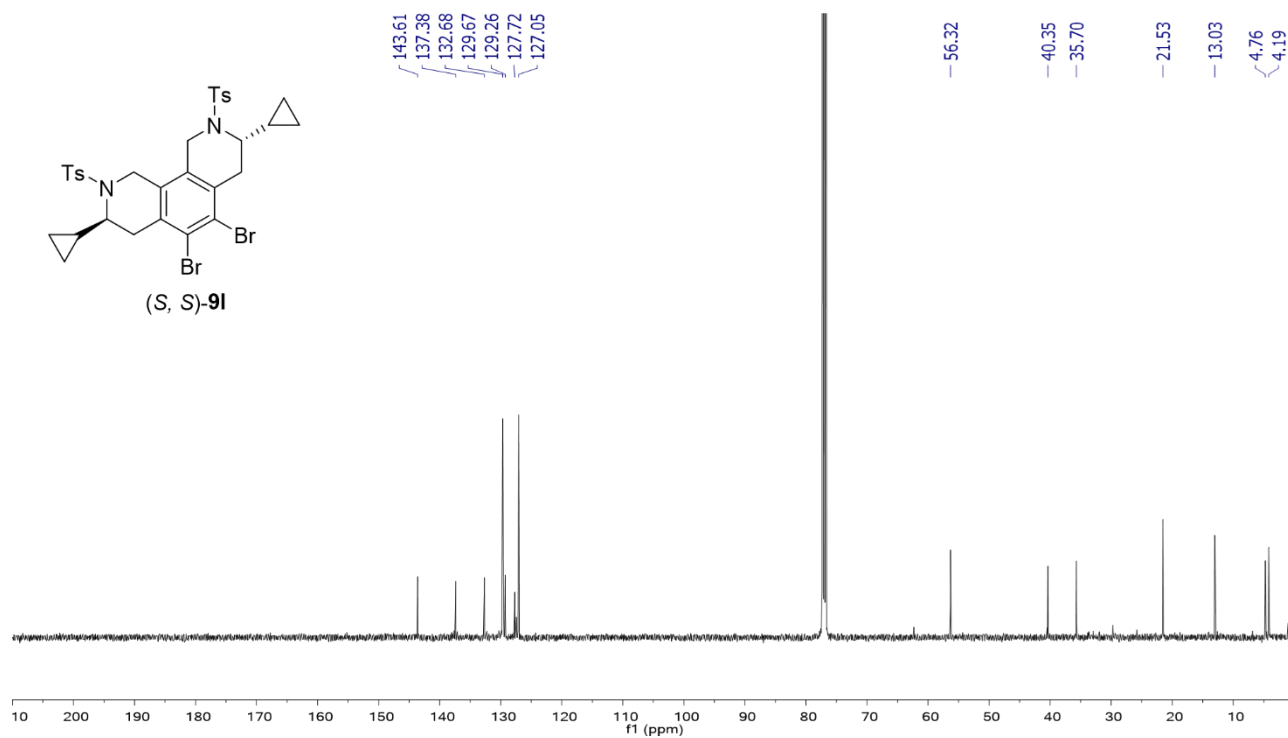

Supplement: d2ob00340f1.pdf [file d2ob00340f1.pdf]
